# Supplementary material for: Atomically dispersed Co2+ in a redox-active COF for electrochemical CO2 reduction to ethanol: unravelling mechanistic insight through operando studies
Source: Royal Society of Chemistry journal article supplement (doi:10.1039/d3ee02946h), 2024-01-01
Supplement: d3ee02946h3.pdf [file d3ee02946h3.pdf]

## Supporting Information

### **Atomically Dispersed Co<sup>2+</sup> in a Redox-Active COF for Electrochemical CO<sub>2</sub> Reduction to Ethanol: Unravelling Mechanistic Insight through Operando Studies**

Ashish Singh,<sup>#a</sup> Soumitra Barman,<sup>#a</sup> Faruk Ahamed Rahimi,<sup>a</sup> Anupam Dey,<sup>a</sup> Rohan Jena,<sup>a</sup>  
Ravi Kumar,<sup>b</sup> Nijita Mathew,<sup>a</sup> Dibyendu Bhattacharyya,<sup>b</sup> Tapas Kumar Maji<sup>a\*</sup>

a. Molecular Materials Laboratory, Chemistry and Physics of Materials Unit, School of Advanced Materials (SAMat), Jawaharlal Nehru Centre for Advanced Scientific Research Bangalore-560064, India.

E-mail: [tmaji@jncasr.ac.in](mailto:tmaji@jncasr.ac.in)

b. Homi Bhabha National Institute, Training School Complex, Anushaktinagar, Mumbai 400094, India

Atomic and Molecular Physics Division, Bhabha Atomic Research Centre, Mumbai 400085, India

<sup>#</sup> Contributed equally

## Experimental Section

### *Physical Measurements*

Infrared (IR) spectroscopy measurements were performed in Bruker FT-IR spectrometer and samples were prepared by making KBr pellets. Thermal stability of the materials was studied using Mettler Toledo TGA 850 instrument in the temperature range of 30-800 °C with a heating rate of 5 °C/min in N<sub>2</sub> atmosphere. Elemental analysis was performed using Thermo Scientific Flash 2000 CHN analyser. Powder X-ray diffraction experiment was performed in Bruker D8 discover instrument using Cu-K $\alpha$  radiation. Field Emission Scanning Electron Microscope (FESEM) images were collected using Lica-S440I FESEM instrument. Samples were prepared on silicon wafers for FESEM studies, and a high vacuum with 100 kV accelerating voltage was used for FESEM analysis. Transmission Electron Microscopic (TEM) images were captured using JEOL JEM-3010 TEM with an accelerating voltage of 300 kV. The EDS elemental mapping images were recorded in a JEOL JEM-F200 TEM. The polymer was dispersed in ethanol and drop cast over carbon-coated copper grid prior to TEM analysis. Solid-state <sup>13</sup>C NMR was performed on a Varian infinity plus 300WB spectrometer at a MAS rate of 5 kHz and a CP contact time of 1.4 ns. The gas adsorption studies (N<sub>2</sub> adsorption at 77 K) were performed using QUANTACHROME QUADRASORD-SI analyzer. Samples were activated at 150 °C under 1x10<sup>-1</sup> Pa vacuum for 12 h prior to measurement of the adsorption isotherm. Electron paramagnetic resonance (EPR) study was carried out at room temperature in the solid-state using Bruker EMX 1444 EPR spectrometer. All the electrochemical experiments were performed using the three-electrode system in Autolab Nova 2.1.3 potentiostat/galvanostat instrument assembled with a Metrohm RDE-2 rotator and CHI 760E potentiostat instrument. HADAAF-STEM experiment was performed in 60 – 300 kV low base Titan® Themis™ instrument. ATR-FTIR spectra were recorded in the FT-IR spectrophotometer (BRUKER, VERTEX 70B). XAS experiments at 300 K were performed at PETRA III, beamline P65, of DESY, Germany. Measurements of Co-K edge at ambient pressure were performed in fluorescence as well as transmission mode using gas ionization chambers to monitor the incident and transmitted X-ray intensities. Monochromatic X-rays were obtained using a Si (111) double crystal monochromator which was calibrated by defining the inflection point (first derivative maxima) of Co foil as 7709 eV. The beam was focused by employing a Kirkpatrick-Baez (K-B) mirror optic. Rhodium-coated X-ray mirror was used to suppress higher-order harmonics. A CCD detector was used to record the transmitted signals. Pellets for the *ex-situ* measurements were made by

homogeneously mixing the sample with an inert Boron nitride matrix to obtain an X-ray absorption edge jump close to one. X-ray absorption near edge spectra (XANES) of the XAS spectra were obtained by subtracting the pre-edge background from the overall absorption and normalizing it to the spline fit using ATHENA software package. The  $k^2$ -weighted extended X-ray absorption fine structure (EXAFS) was Fourier transformed over the limited range of  $k$  from 3 to 14  $\text{\AA}^{-1}$ .

The normalized, energy-calibrated Co K-edge XANES spectra were obtained using standard data reduction techniques with Athena and Artemis software. The EXAFS oscillations  $\chi(k)$  as a function of photoelectron wave number  $k$  was extracted by following standard procedures. The theoretical paths were generated using FEFF and the models were completed in a conventional way using a fitting program named Artemis5. The theoretical phase and amplitude functions of Co-N and Co-O and Co-Cl were calculated with FEFF. CIF file was obtained for Co-TAPA-OPE COF from the modeled structure of OPE-TAPA-COF from Materials Studio 2020. The values for the amplitude reduction factor ( $S_0^2$ ) and the mean square disorder ( $\sigma^2$ ) were determined by fitting the corresponding CIF with FEFF. The EXAFS parameters were obtained by a least-squares fit in the R-space of the  $k^2$ -weighted Fourier transform (FT) data.

### *Materials and method*

The reagents and chemicals used for the synthesis of the organic linker (OPE-pyr) were purchased from Sigma-Aldrich Chemical Co. Ltd and used as such. KBr pellets were made for recording the FT-IR spectra.

### *Computational Details*

The models of the COF were built using the Forcite module of the Accelrys Materials Studio software package. For the modeling, we applied the space group with the highest possible symmetry, taking into account the rotation of the phenyl group w.r.t the basic plane of TAPA unit. The lattice models were geometry optimized using the MS Forcite molecular dynamics module (Universal force fields). Structure refinements using the Pawley method were then carried out as implemented in the Reflex module of the Materials Studio software. Pseudo-Voigt peak profiles were used, and peak asymmetry was corrected using the Berar-Baldinozzi method. The unit cell parameters  $a$ ,  $b$ ,  $c$ , crystallite size along  $a$ ,  $b$ ,  $c$ , FWHM parameters,  $U$ ,  $V$ ,  $W$ , profile parameters  $NA$ ,  $NB$ , and zero-point were refined based on previous studies.<sup>1-4</sup> As for the AB stacked COF model, in addition to the above

parameters, alpha, beta, and gamma parameters were also refined. The background was refined with 20<sup>th</sup>-order polynomial. The eclipsed (AA-stacked) model with  $P\bar{3}$  space group was refined to give lattice parameters,  $a = b = 55.932229 \text{ \AA}$ ,  $c = 4.121883 \text{ \AA}$  and  $\alpha = \beta = 90^\circ$ ,  $\gamma = 120^\circ$  with a weighted-profile R factor  $R_{wp} = 4.09\%$  and unweighted-profile R factor  $R_p = 3.14\%$  (Fig. S3-S4, Table S2). However, the staggered (AB-stacked) model (space group symmetry  $P1$ ,  $a = 55.837446 \text{ \AA}$ ,  $b = 55.826763 \text{ \AA}$ ,  $c = 9.348897 \text{ \AA}$  and  $\alpha = 90.18597^\circ$ ,  $\beta = 90.04859^\circ$ ,  $\gamma = 119.66183^\circ$ ) showed better agreement with the experimental PXRD pattern with  $R_{wp} = 3.73\%$  and  $R_p = 2.83\%$ . Thus, the staggered model is likely to be the model for TAPA-OPE COF.

Furthermore, the computational studies were carried out for repeating units of TAPA-OPE and Co-TAPA-OPE. Density functional theoretical (DFT) calculations have been carried out using the Gaussian16 program package utilizing structural units of TAPA-OPE and Co-TAPA-OPE as the model systems.<sup>5</sup> The calculations were performed utilizing B3LYP exchange-correlation functional along with 6-31+G(d) basis set for all atoms except for Co atom, for which LANL2DZ, which utilizes a widely used effective core potential (ECP)- type basis set, was used.<sup>6-13</sup> The calculations were performed in absence of any solvent. Grimme's d3 dispersion was also used to tackle weak interactions. The harmonic vibrational frequency analysis of the optimized geometries was performed to confirm the nature of stationary points. All the optimized intermediates revealed the absence of any imaginary vibrational mode, indicating the optimized geometries as minima on the potential energy surface (PES). All thermochemical data were obtained with the ideal gas-rigid rotor-simple harmonic oscillator approximations at 298.15 K and 1 atm. Zero point-energy corrections were included in the Gibbs free energy values along with entropy effect and enthalpy effect. The pictures of the optimized structures were taken from Gauss View 6.0.16.

### *Electrochemical Experiment*

All electrochemical experiments were done in a three-electrode cell configuration with a glassy carbon (GC) electrode as the working electrode (WE), platinum as a counter electrode (CE), and Ag/AgCl as a reference electrode (RE). An electro-chemical ink was prepared by making a dispersion of a mixture of COF (2 mg) and Vulcan carbon (2 mg) in the solvent mixture of isopropanol (500  $\mu\text{L}$ ) and water (500  $\mu\text{l}$ ). Further, Nafion (13  $\mu\text{L}$ ) was added as a binder to the electrochemical ink. Upon sonication for 30 minutes, a well-dispersed ink (3.5

$\mu\text{L}$ ) was drop casted over the GC electrode and allowed to dry for 3 h under ambient conditions. This was done thrice, and therefore cumulatively,  $10.5 \mu\text{L}$  ink was drop-cast. LSVs were performed with the scan rate of  $5 \text{ mV/s}$ . The potentials are reported with respect to reversible hydrogen electrode (RHE). All current densities were calculated using the geometric surface area of the electrode. All potentials were rescaled to the pH-independent reversible hydrogen electrode (RHE) and reported without  $iR$  compensation.

### *Electrolysis in H-type cell*

Carbon fibre paper (CFP) (Global Nanotech, thickness  $\sim 270 \mu\text{m}$ ) was used as received and cut into  $1 \text{ cm}^2$  as the working electrode while performing controlled potential electrolysis in an H-type cell (Fig. S15). The two compartments were separated using Nafion 117 membrane. The cathodic compartment was comprised of CFP as working electrode and Ag/AgCl as reference electrode, whereas Pt plate was used as counter electrode in anodic compartment. An aliquot of  $100 \mu\text{L}$  of the catalyst ink was drop-casted onto a CFP and allowed to dry in air overnight, resulting in the catalyst loading of  $0.2 \text{ mg cm}^{-2}$ .

$0.2 \text{ M KHCO}_3$  electrolyte was used for both chambers. The total volume of the working electrode chamber is  $85.0 \text{ mL}$ .  $40.0 \text{ mL}$  of electrolyte was added to this chamber. A  $\text{CO}_2$ -saturated electrolyte was prepared by purging  $\text{CO}_2$  (99.99%) into aqueous solution of  $\text{KHCO}_3$  for 30 min, and a flow of  $10 \text{ sccm CO}_2$  was maintained over the electrolyte throughout the electrochemical measurements. At first, 20 cycles of CV sweep between  $-0.07 \text{ V}$  and  $-0.47 \text{ V}$  vs. RHE were conducted to generate stable CV curves. Chronoamperometry was performed for 2 h at each potential for  $\text{CO}_2$  reduction tests in the H-type cell.

### *Electrolysis in flow cell*

The flow cell uses a three-electrode system with an electrochemical workstation as a potentiostat. In the flow cell,  $1 \text{ M KHCO}_3$  was used for the electrolyte. Using a peristaltic pump,  $30 \text{ mL}$  of cathode was circulated through the cathode chamber at a constant rate of  $20 \text{ mL min}^{-1}$ . An additional  $30 \text{ mL}$  of anode fluid was circulated through the anode chamber at the same rate. Carbon dioxide gas was used to flow at  $30 \text{ standard cubic centimeters per minute (sccm)}$  on the back of the GDE, controlled by a mass flowmeter. The  $400 \mu\text{L}$  catalyst ink was sprayed on GDL to prepare the GDEs with a load of  $\sim 1 \text{ mg cm}^{-2}$ , which was further dried at room temperature for use.

The partial current density of the products was calculated according to:

$$j_{\text{partial}} = j_{\text{tot}} \cdot FE_{\text{product}}$$

### *Calculation of overpotential*

The overpotential  $\eta$  is the difference between the actual electrode reduction potential and the thermodynamic potential, defined by the following equation:

$$\text{Overpotential } (\eta) = E \text{ (RHE)} - E_{CO_2/EtOH}^0 \text{ (RHE)}$$

In the equation, E is the applied potential (vs. RHE) and  $E_{CO_2/EtOH}^0$  is the standard electrode for CO<sub>2</sub> to ethanol conversion, which is 0.09 V (vs. RHE).<sup>n</sup>

## **Synthesis**

### *OPE-pyr aldehyde synthesis*

The synthesis and characterization of 1,4-diethynyl-2,5-bis(pentyloxy)benzene (**D**) (Scheme S1) was reported previously by our group. Further, details about synthetic procedure and characterization data for newly synthesized 5,5'-((2,5-bis(pentyloxy)-1,4-phenylene)bis(ethyne-2,1-diyl))dipicolinaldehyde (OPE-pyr) is given below. We have characterized OPE-pyr organic linker using various experimental techniques like <sup>1</sup>H-NMR, IR and Mass spectrometry.

The compound 5,5'-((2,5-bis(pentyloxy)-1,4-phenylene)bis(ethyne-2,1-diyl))dipicolinaldehyde (OPE-pyr) was synthesized by the Sonogashira-Hagihara coupling reaction. The earlier reported 1,4-diethynyl-2,5-bis(pentyloxy)benzene (**D**) (2.3 mmol, 1 equiv.) and 5-bromopicolinaldehyde (4.6 mmol, 2 equiv.) were taken together in mixed of dried solvent tetrahydrofuran (THF) (40 mL) and triethyl amine (20 mL) followed by addition of Cu(I) (20 mol%) which acts as co-catalyst. The N<sub>2</sub> gas was purged into the reaction mixture for 30 minutes to ensure the removal of dissolved oxygen from the solvents. In the last, 10 mol% of Palladium catalyst [Pd (0)] was added and again, the reaction mixture was degassed for 20 minutes by N<sub>2</sub> purging. Subsequently, the reaction mixture (R.M.) was stirred under an inert atmosphere at 75 °C for 48 hrs. Reaction progress was monitored by

TLC analysis. Once the reactant was finished, then the R.M. was cooled to room temperature and the solvent was evaporated under reduced pressure. The solid product was dissolved in ethyl acetate and washed thrice using water, 2 N HCL and saturated brine solution. The organic layer was dried over anhydrous sodium sulphate. The solvent was evaporated in a rotary evaporator that yielded a crude product of OPE-pyr. The crude product was further purified separately by column chromatography packed in silica gel (60-120 mesh size) using hexane: ethyl acetate solvent system. The yield of column purified OPE-pyr product is found to be 58%. Characterization data for OPE-pyr is given as follows.

*5,5'-((2,5-bis(pentyloxy)-1,4-phenylene)bis(ethyne-2,1-diyl))dipicolinaldehyde (OPE-pyr)*

$R_f$ : 0.5 (7% ethyl acetate: hexane), IR (KBr)  $\nu_{\max}/\text{cm}^{-1}$  = 2936, 2862, 2819, 2205, 2035, 1960, 1709, 1574, 1503, 1393, 1294, 1219, 1015, 836, 761, 723, 618, 530.  $^1\text{H}$  NMR ( $\text{CDCl}_3$ , 600 MHz):  $\delta$  0.92-0.95 (t, 6H,  $-2\text{CH}_3$ ), 1.39-1.45 (m, 4H,  $-2\text{CH}_2$ ), 1.50-1.55 (m, 4H,  $-2\text{CH}_2$ ), 1.85-1.90 (pentate, 4H,  $-2\text{CH}_2$ ), 4.04-4.06 (t, 4H,  $-2\text{OCH}_2$ ), 7.06 (s, 2H, 2ArH), 7.96 (broad, 4H, 4ArH), 8.89 (s, 2H, 2ArH), 10.08 (s, 2H, 2CHO).  $^{13}\text{C}$  NMR ( $\text{CDCl}_3$ , 150 MHz): 14.1, 22.4, 28.2, 28.9, 69.6, 91.3, 92.8, 113.7, 116.7, 121.1, 124.9, 139.1, 150.9, 152.4, 153.9, 192.5. ESI-MS+  $m/z$  Calcd. for  $\text{C}_{32}\text{H}_{32}\text{N}_2\text{O}_4$ : 509.2440  $[\text{M}+\text{H}]^+$ , found 509.2437.

*Synthesis of TAPA-OPE*

The linker, 4,4'-((2,5-bis(pentyloxy)-1,4-phenylene)bis(ethyne-2,1-diyl))dipicolinaldehyde (OPE-5) was synthesized through Sonogashira-Hagihara coupling reaction by adapting a reported procedure (Scheme S1 and Fig. S1-S2). Next, the COF, namely, **TAPA-OPE**, was synthesized by the Schiff base condensation between OPE-5 and commercially available *tris*-(4-aminophenyl) amine (TAPA). In brief, OPE-5 (15 mg, 0.03 mmol) and TAPA (6 mg, 0.02 mmol) were mixed together in a Pyrex tube, followed by adding 1 mL of a binary solvent system comprising of *n*-butanol and *o*-dichlorobenzene in a volume ratio of 3:7 (Fig. 1a & S2). The reaction mixture was sonicated for 15 minutes to homogenize, followed by the addition of the catalytic amount of 6 M acetic acid (100  $\mu\text{L}$ ). The reaction mixture was degassed by flash-frozen in liquid nitrogen upon applying high vacuum through three freeze pump-thaw cycles. The degassed sample was sealed under a high vacuum and kept at 120  $^\circ\text{C}$  for 72 h. An orange-colored material was obtained, which was washed thrice with fresh *n*-butanol (30 mL), tetrahydrofuran (THF) (30 mL), and hot DMF (150 mL) to remove oligomeric species. Purified COF (TAPA-OPE) was washed with acetone (50 mL) and dried at 150  $^\circ\text{C}$  for 12 h. The yield of COF was found to be 60-65%.

### *Covalent integration of Co<sup>II</sup> in TAPA-OPE (Co-TAPA-OPE)*

Prior to cobalt complexation, TAPA-OPE (20 mg) was activated at 150 °C for 12 h (Fig. 3a). Now, activated TAPA-OPE COF was dispersed in acetonitrile (10 mL). A solution of CoCl<sub>2</sub>.6H<sub>2</sub>O (5 mg) in acetonitrile (5 mL) was slowly added to the dispersed solution of TAPA-OPE and allowed to stir at reflux conditions for 4 h. This has resulted in Co<sup>II</sup> coordinated TAPA-OPE (**Co-TAPA-OPE**). The Co-TAPA-OPE was isolated by centrifugation and washed with fresh acetonitrile (10 mL) multiple times to remove unreacted cobalt salt and then dried at 120 °C overnight for further use.

### *Electrical conductivity*

A fine dispersion of 2 mg of TAPA-OPE in 0.2 mL THF was made upon sonication and subsequently spin-coated on the glass surface at 1200 rpm for 60 seconds. A thin coating of TAPA-OPE on the glass surface was dried at 60 °C for 1 hr. Next, aluminium metal (Al) was deposited under vacuum by physical vapor deposition (PVD) method on TAPA-OPE coated glass by masking the polymer layer using Teflon tape. Electrical conductivity was then measured for the Al deposited thin film of TAPA-OPE. The conductivity for TAPA-OPE was calculated by the following formula;

$$\text{Conductivity} = \text{Slope} \times (\text{WT/L})$$

Where L= length of the coated surface (1 cm), W= width of the coated surface (1 cm), T= Film Thickness (T = 345 nm).



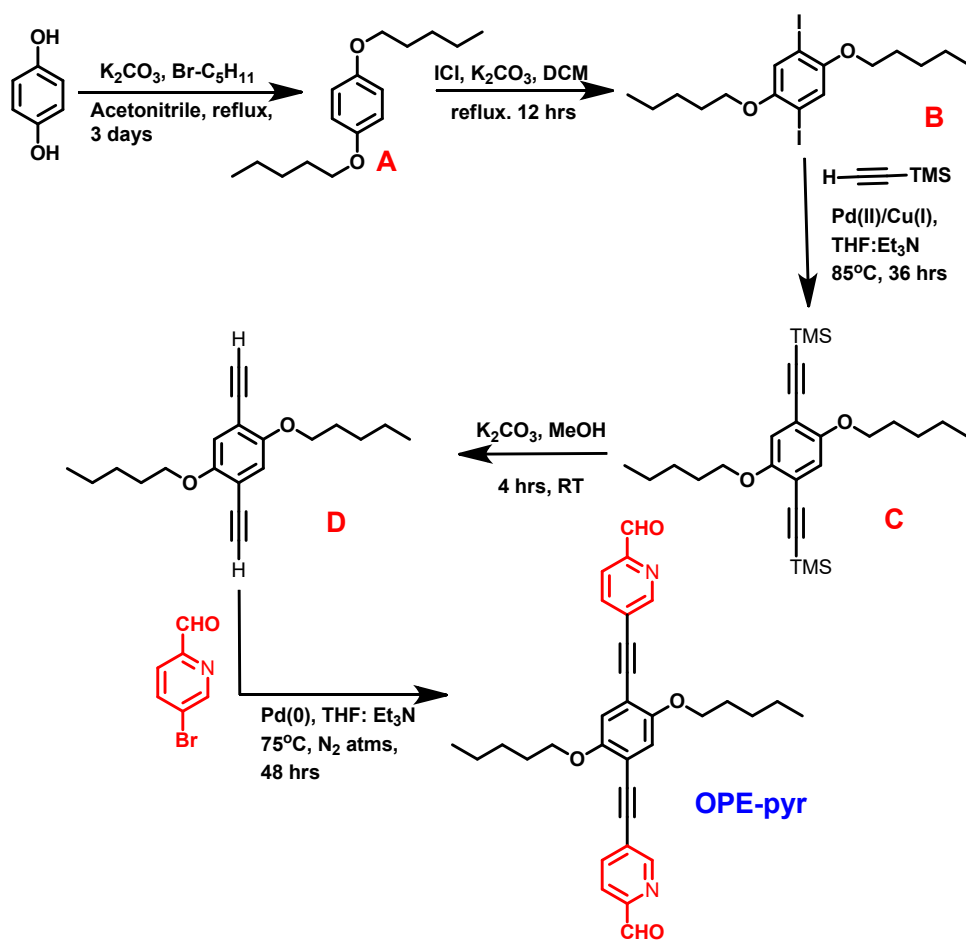

**Scheme S1.** Synthetic scheme for OPE-pyr organic linker.

**Scheme for COF synthesis (TAPA-OPE):**

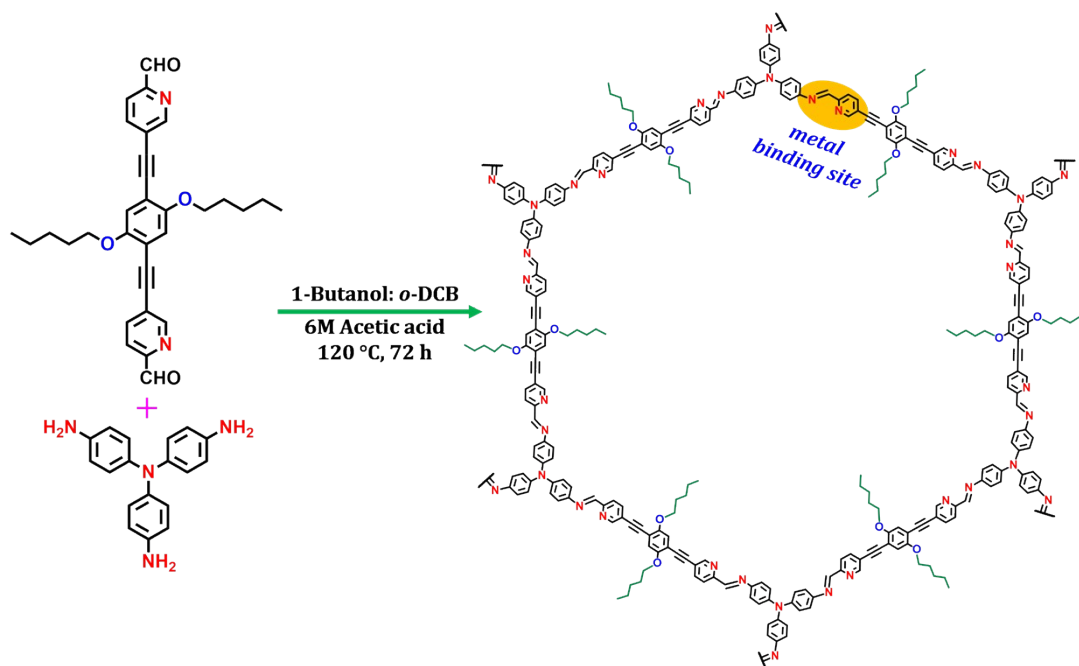

**Scheme S2.** Synthetic scheme for TAPA-OPE COF.

**NMR spectra for organic linker (OPE-pyr):**

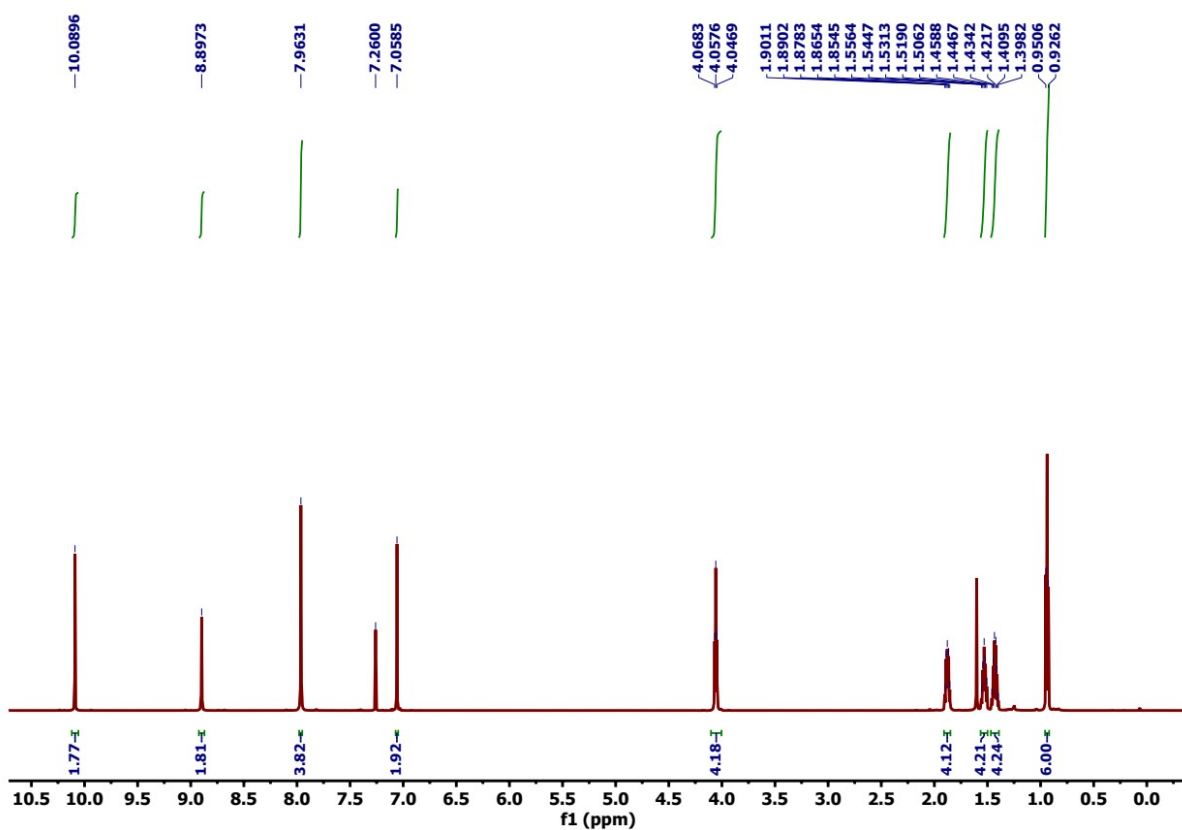

Fig. S1.  $^1\text{H}$ -NMR spectrum for OPE-pyr recorded in  $\text{CDCl}_3$ .

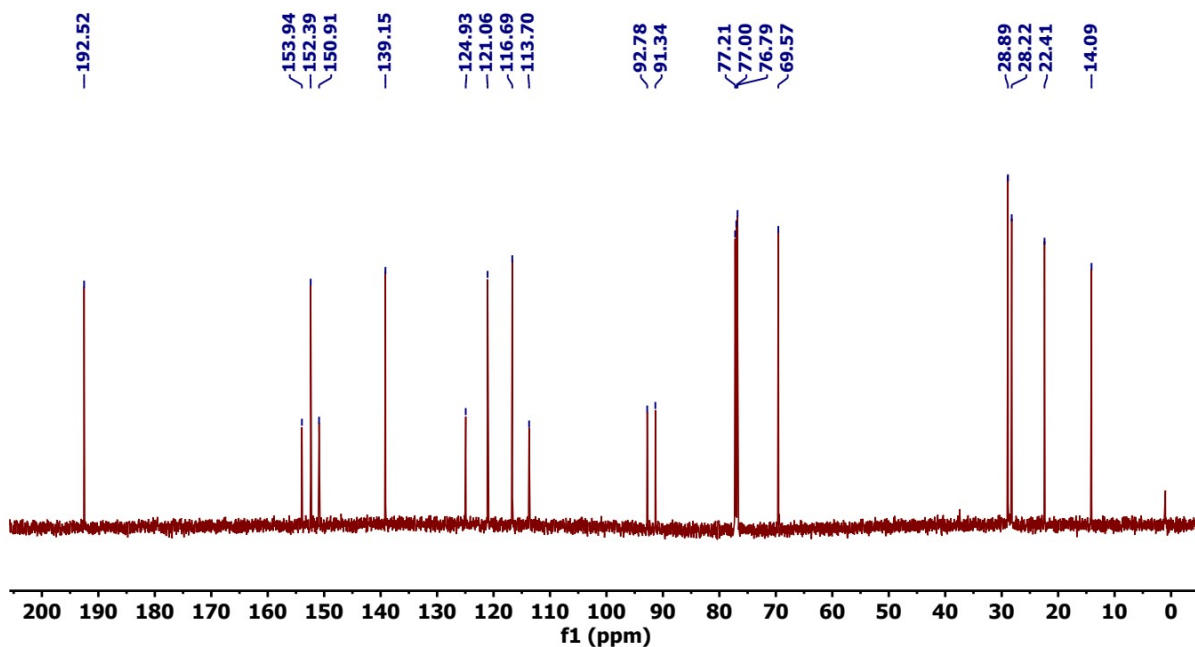

Fig. S2.  $^{13}\text{C}$ -NMR spectrum for OPE-pyr recorded in  $\text{CDCl}_3$ .

**Characterization of TAPA-OPE:**

**PXRD for eclipsed model of TAPA-OPE:**

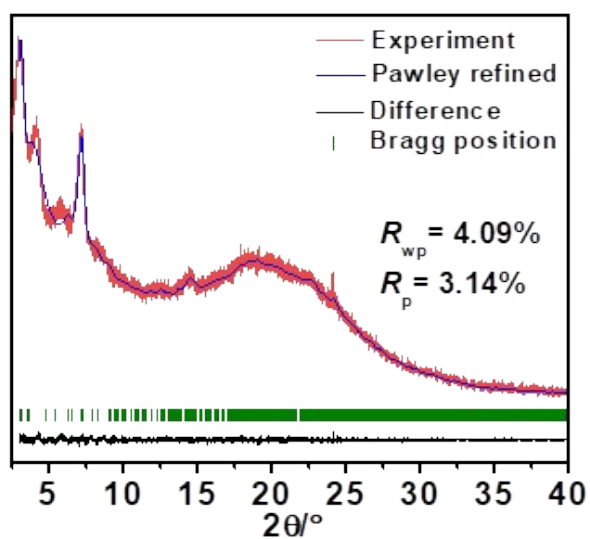

**Fig. S3.** Experimental and simulated PXRD for the eclipsed model of TAPA-OPE COF.

**Modelled structure for eclipsed conformation of TAPA-OPE:**

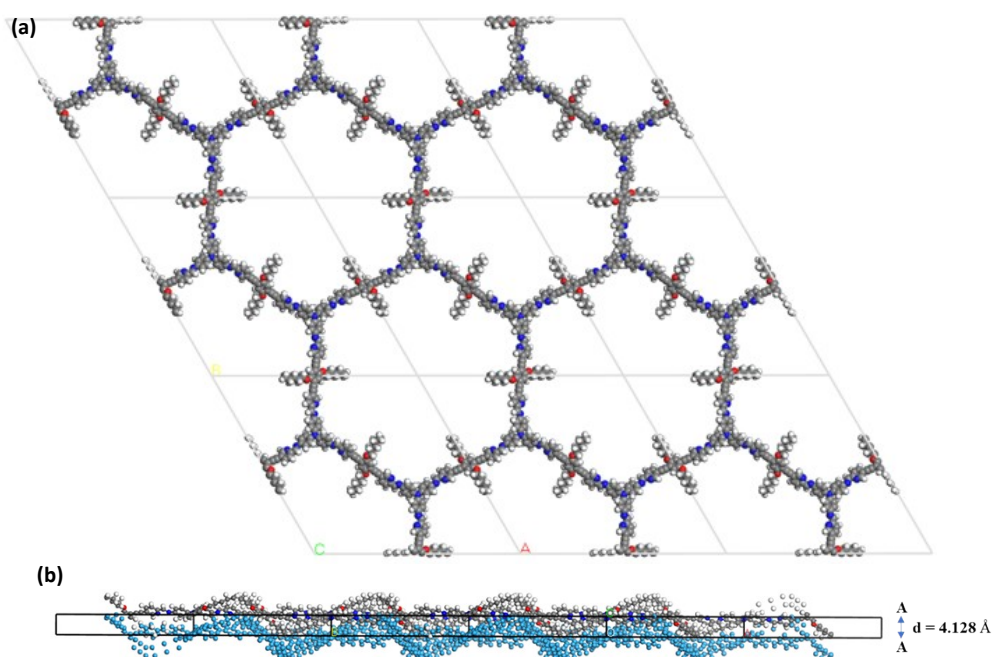

**Fig. S4.** Simulated structure of TAPA-OPE in eclipsed conformation, and extended 2D structure.

**IR-Spectrum for TAPA-OPE:**

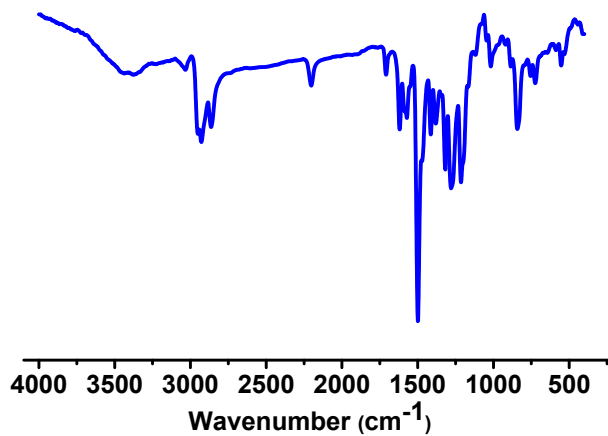

**Fig. S5.** IR-spectrum for TAPA-OPE.

**TGA plot:**

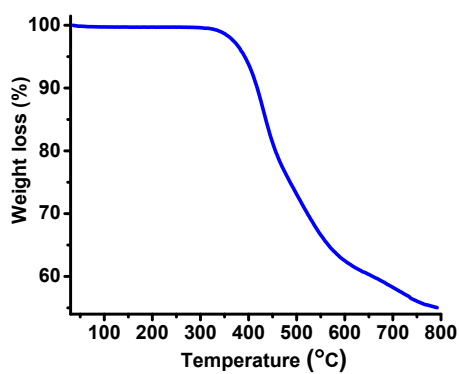

**Fig. S6.** TGA graph for TAPA-OPE under N<sub>2</sub> atmosphere.

**Pore size distribution in TAPA-OPE:**

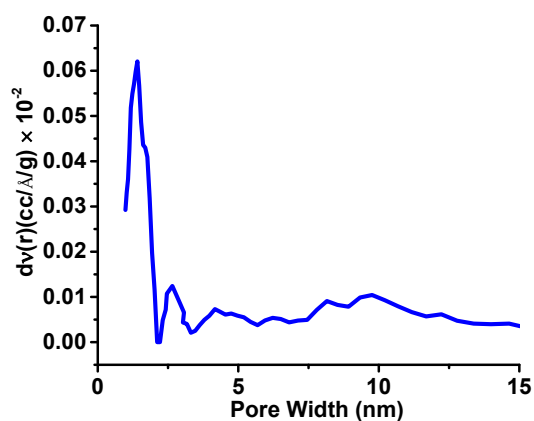

**Fig. S7.** Pore size distribution (from  $N_2$  adsorption data) for TAPA-OPE.

**Electrochemical band gap for TAPA-OPE:**

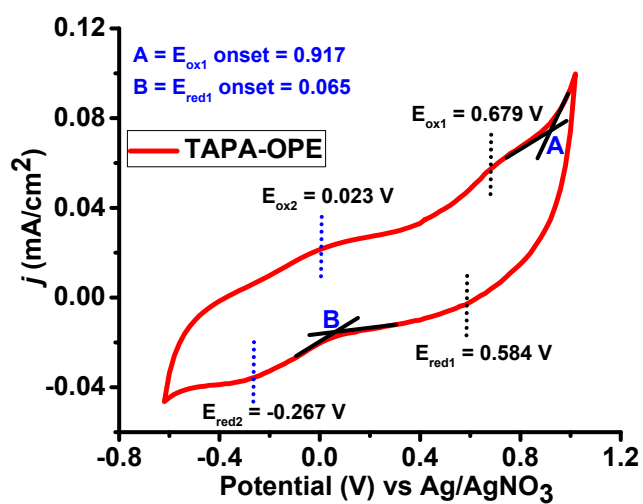

**Fig. S8.** CV for electrochemical band gap for TAPA-OPE.

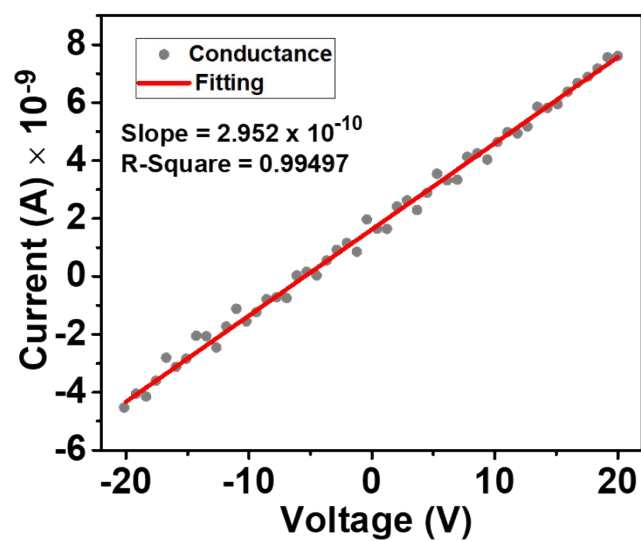

Fig. S9. Electrical Conductivity for TAPA-OPE COF.

**Characterization of Co-TAPA-OPE:**

**ATR-FTIR spectra:**

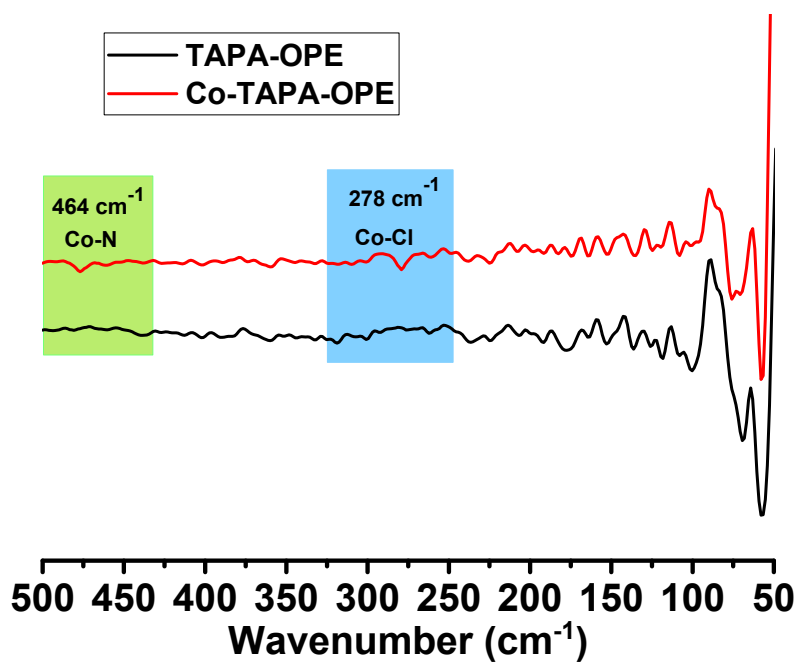

**Fig. S10.** ATR-FTIR spectra for as-synthesized COF and metalated COF.

**TGA-Mass analysis for Co-TAPA-OPE:**

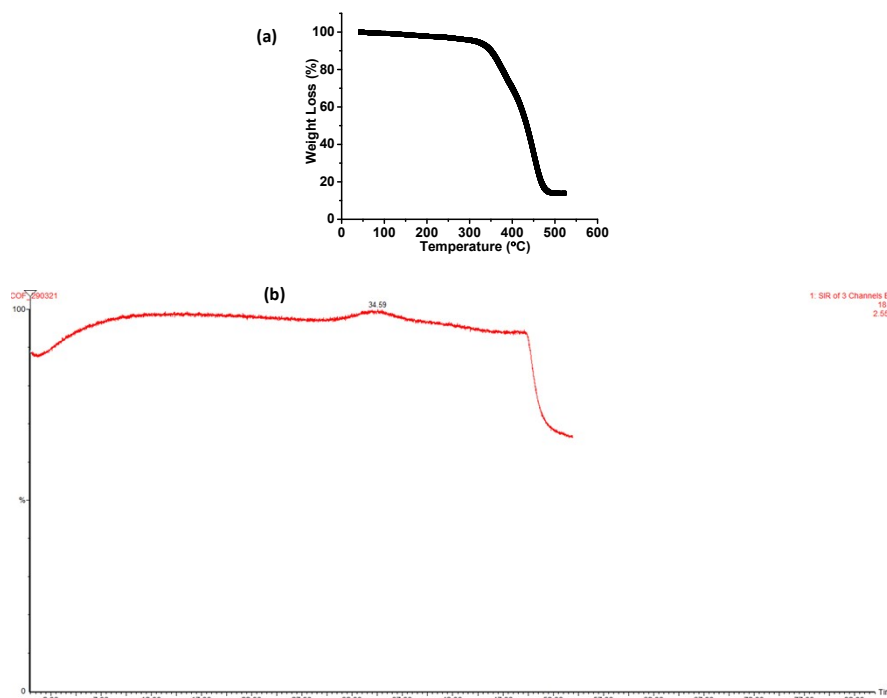

**Fig. S11.** TGA-Mass analysis for Co-TAPA-OPE. (a) TGA plot under Ar atmosphere. (b) Weight loss observed for water molecule in the TGA-Mass spectrometry.

**PXRD pattern for Co-TAPA-OPE:**

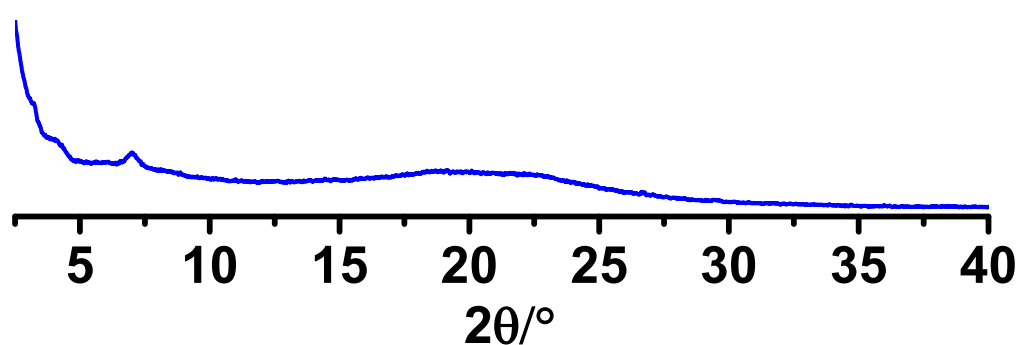

**Fig. S12.** PXRD pattern for Co-TAPA-OPE.



### EDX analysis for Co-TAPA-OPE:

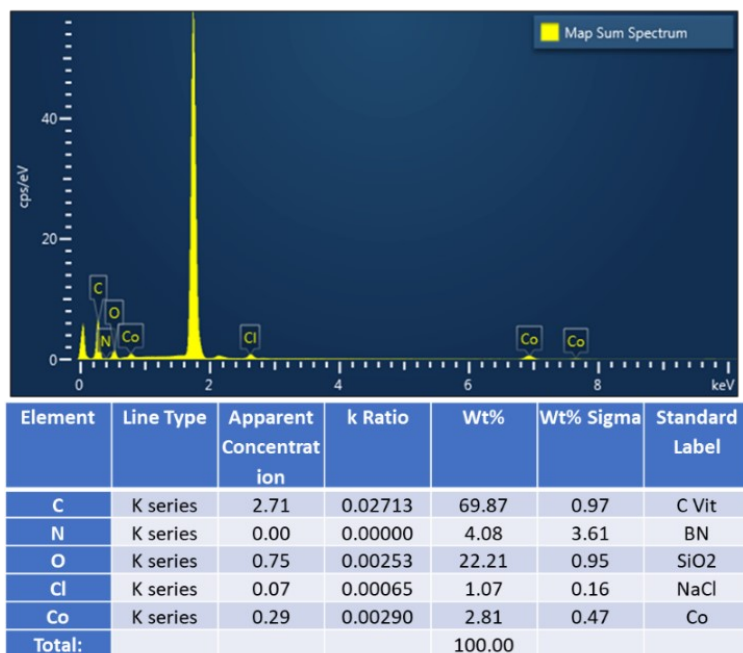

Fig. S13. EDX analysis for Co-TAPA-OPE.

### Co K-edge EXAFS experiment for Co-TAPA-OPE:

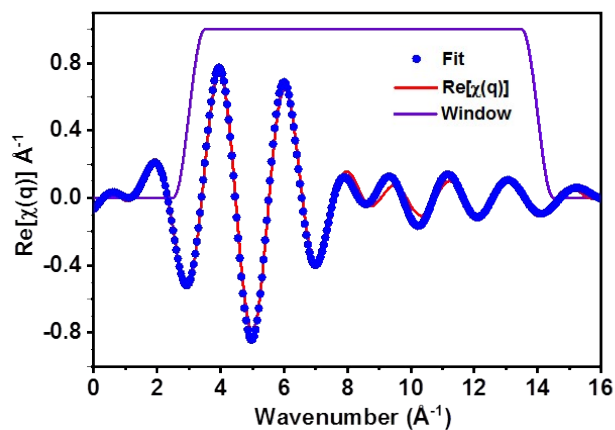

Fig. S14. Co K-edge EXAFS experimental data for Co-TAPA-OPE and corresponding fitting in Fourier transformed back into the wavevector space ( $q$ -space).

**Table S1.** CN, coordination number; R, the distance between absorber and backscatter atoms;  $\sigma^2$ , Debye-Waller factor (a measure of thermal and static disorder in absorber-scatterer distances); R factor is used to value the goodness of the fitting;  $S_0^2=1$

| Sample             | Path  | CN    | R(Å) | $\sigma^2(10^{-3}\text{Å}^2)$ | R factor |
|--------------------|-------|-------|------|-------------------------------|----------|
| Co-TAPA-OPE<br>COF | Co-N  | 2.004 | 1.96 | 5.9                           | 0.0014   |
|                    | Co-O  | 2.006 | 2.1  | 7.3                           |          |
|                    | Co-Cl | 1.98  | 2.16 | 10.06                         |          |

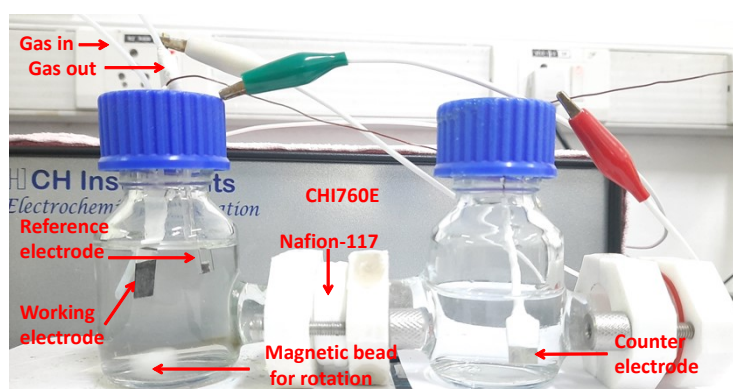

**Fig. S15.** Photograph of the used H-type cell during electrochemical CO<sub>2</sub>RR.

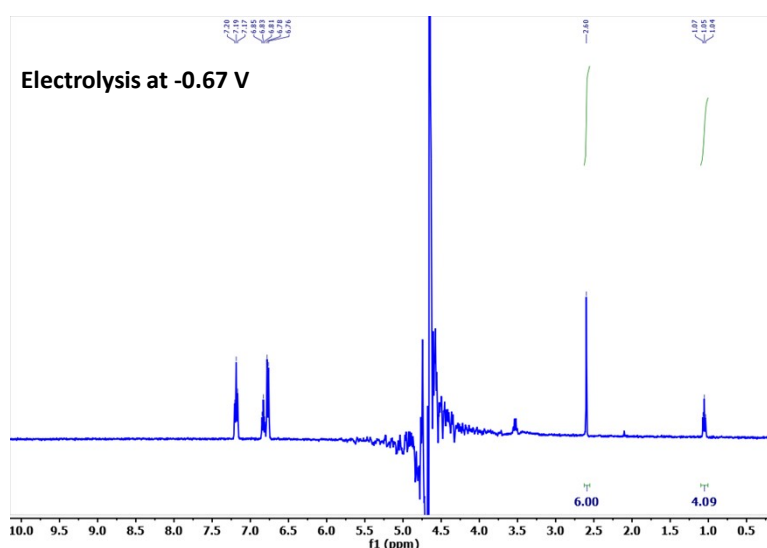

**Fig. S16.** <sup>1</sup>H-NMR spectra of electrolyte solution after controlled potential electrolysis at -0.67 V for 2h with the integration value of ethanol.

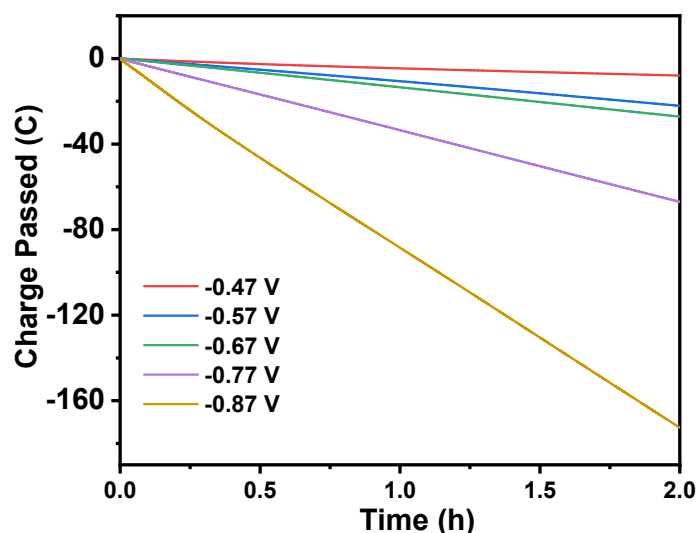

**Fig. S17.** Total charge passed (Q) during controlled potential electrolysis in CO<sub>2</sub>RR which was used for the calculation of FE.

**Calculation of Faradaic efficiency for liquid product**

The Faradaic efficiency of liquid product was calculated using the following equation<sup>14</sup>:

$$FE = \frac{z \cdot n \cdot F}{Q}$$

Where, z= the number of electron exchanged (here in case of CO<sub>2</sub> reduction to ethanol, z=12)

N= Number of moles of product

F= Faraday's constant (F=96485 C/mol)

Q= Total charge passed (C)

From Fig. S16, the ratio of [DMSO] and [EtOH] was obtained using integration value.

$$[DMSO]/[EtOH] = [6/6]/[4.09/3] = 0.733$$

$$[EtOH] = [DMSO]/0.733 \text{ -----(1)}$$

Now, during NMR sample preparation 600 μL aliquot was taken along with 50 μL D<sub>2</sub>O and 50 μL external standard.

So effective strength of DMSO in the NMR tube is 0.286 mM;

From equation 1, we found [EtOH] = 0.39 mM

The amount of EtOH in 0.6 mL = 0.234 μmol

In a total of 40 mL solution, the amount of EtOH = 15.6  $\mu\text{mol}$

From Fig. S17, we found the total amount of charge passed during 2 h to be 27 C.

$$\text{So, FE\%} = \frac{15.6 \times 10^{-6} \text{ mol} \times 12 \times 96485 \text{ C mol}^{-1}}{27 \text{ C}} \times 100\% = \mathbf{66.8\%}$$

### Calculation of Faradaic efficiency for gaseous products

Faradaic efficiencies for the formation of gas products were calculated as follows<sup>14</sup>:

$$\text{FE\%} = \frac{n.F.V.v.P^0}{R.T.i} \times 100\%$$

Where, n is the number of electrons required for products (for CO formation it is 2), V (vol %) is the volume concentration of gas in the gasbag from electrochemical cell, v (mL min<sup>-1</sup> at room temperature and ambient pressure) is the gas flow rate, i (mA) is the steady-state cell current, P = 1.01 x 10<sup>5</sup> Pa, T = 273.15 K, F = 96485 C mol<sup>-1</sup>, and R = 8.314 J mol<sup>-1</sup> K<sup>-1</sup>.

**Table S2:** Product distribution table at different applied potentials.

| Potential vs. RHE | FE%(H <sub>2</sub> ) | FE% (CO) | FE% (HCOOH) | FE% (CH <sub>4</sub> ) | FE% (C <sub>2</sub> H <sub>5</sub> OH) | Total FE% |
|-------------------|----------------------|----------|-------------|------------------------|----------------------------------------|-----------|
| -0.47 V           | 28.1                 | 13.02    | 26.2        | N.D.                   | 30.8                                   | 98.12     |
| -0.57 V           | 22.02                | 18.1     | 8.5         | N.D.                   | 47                                     | 95.6      |
| -0.67 V           | 20.1                 | 8.2      | N.D.        | 4.32                   | 66.8                                   | 99        |
| -0.77 V           | 44.8                 | 15.5     | N.D.        | 6.17                   | 31.8                                   | 98.1      |
| -0.87 V           | 52.9                 | 18.7     | N.D.        | 15.2                   | 12.8                                   | 99.6      |

N.D- not detected

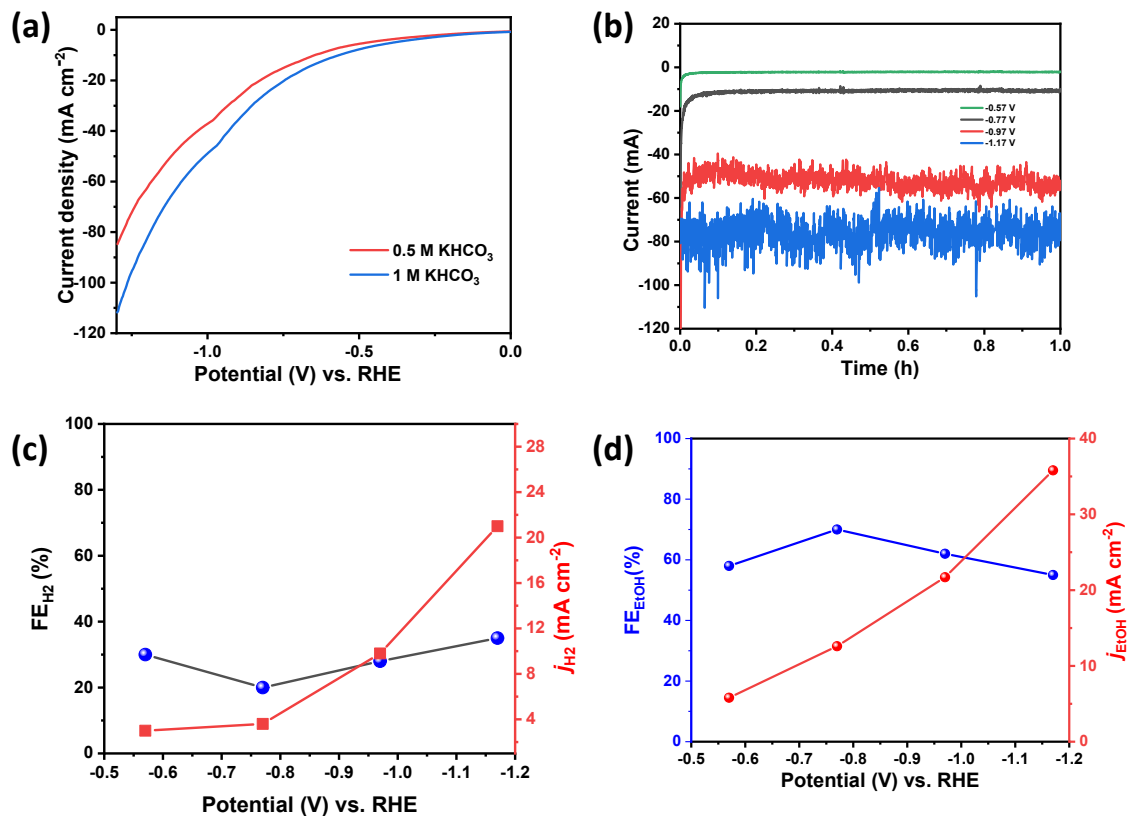

**Fig. S18.** (a) LSV plot in flow cell under  $\text{CO}_2$ . (b) i-t plots at different applied potential in 1M  $\text{KHCO}_3$  solution. (c) FE% and partial current density of ethanol. (d) FE% and partial current density of  $\text{H}_2$ .

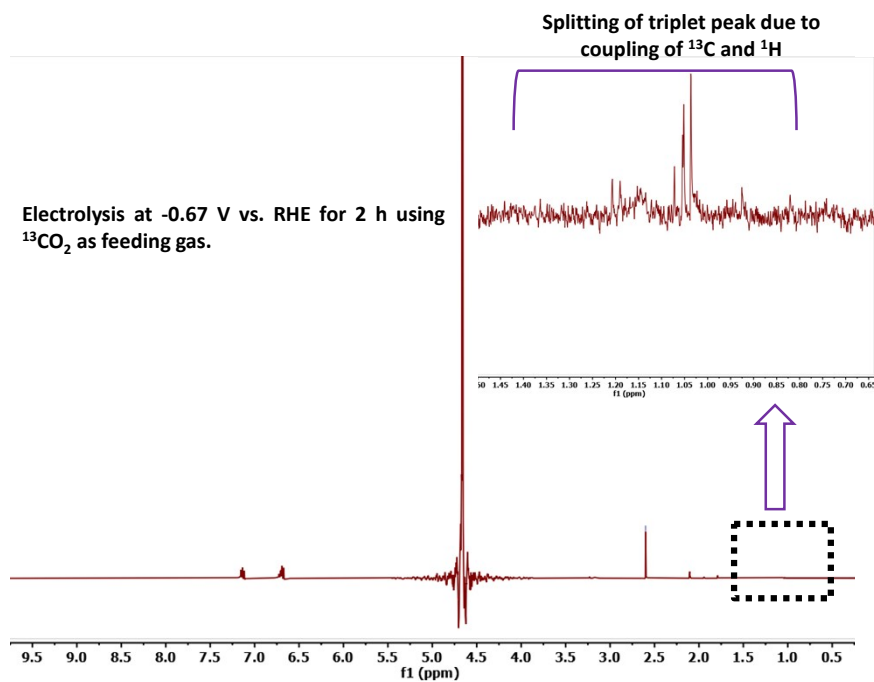

**Fig. S19.**  $^1\text{H}$ -NMR spectra of the electrolytes containing  $^{13}\text{CH}_3^{13}\text{CH}_2\text{OH}$  while using  $^{13}\text{CO}_2$  as feeding gas at  $-0.67\text{ V}$  vs. RHE.

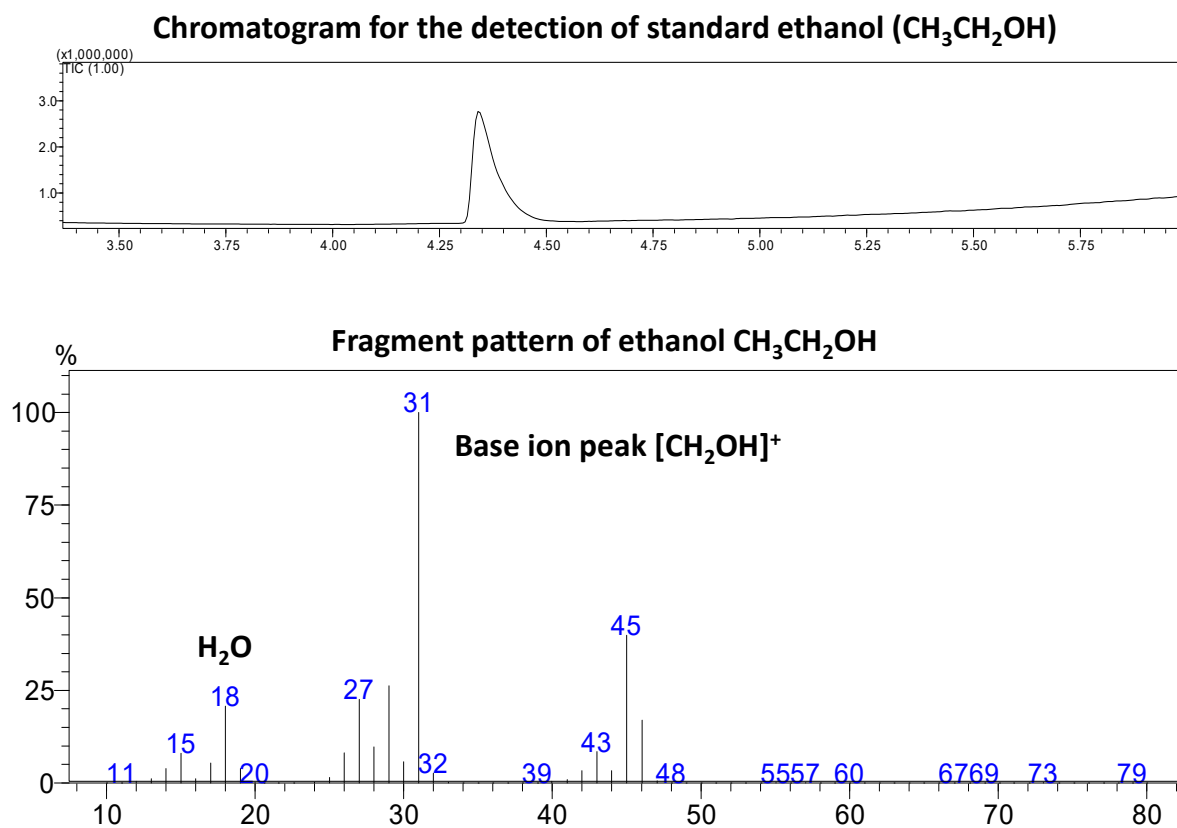

**Fig. S20a.** GC-MS chromatogram and corresponding mass spectrum of standard ethanol sample using Stabilwax®-DA column (30 m; 0.18 mm ID; 0.18 $\mu\text{m}$ ).

### Chromatogram for the detection of isotopic ethanol ( $^{13}\text{CH}_3^{13}\text{CH}_2\text{OH}$ )

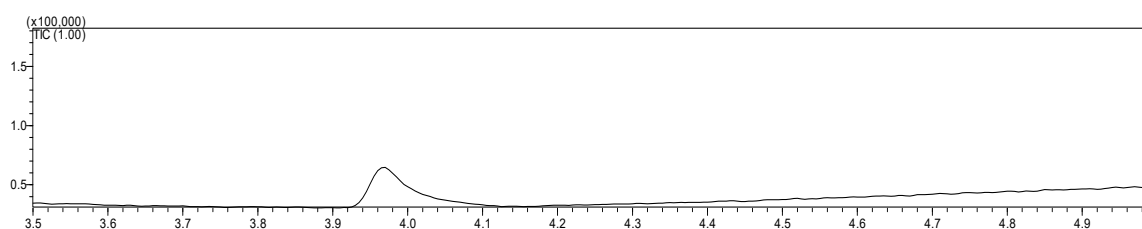

### Fragment pattern of isotopic ethanol ( $^{13}\text{CH}_3^{13}\text{CH}_2\text{OH}$ )

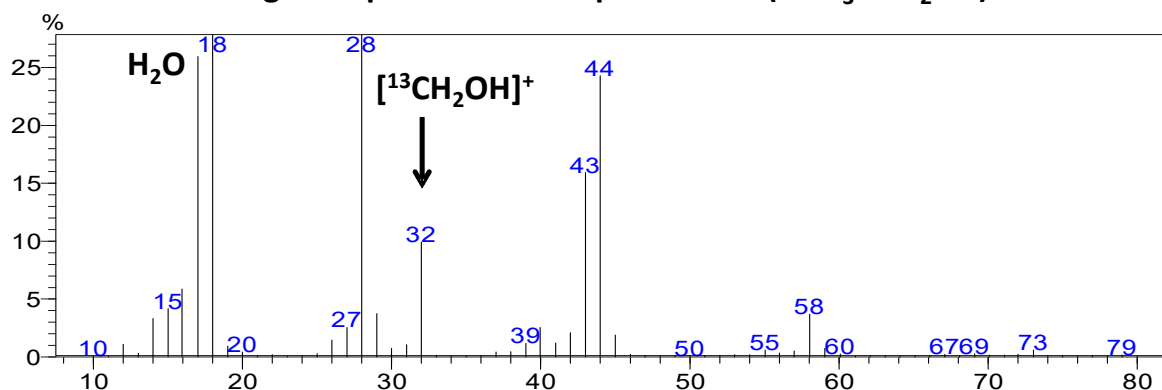

**Fig. S20b.** GC-MS chromatogram and corresponding mass spectrum of the sample using  $^{13}\text{CO}_2$  as feeding gas during controlled potential electrolysis at  $-0.67$  V vs. RHE. The electrolyte solution was directly injected to GC-MS and acquired spectra using Stabilwax®-DA column (30 m; 0.18 mm ID;  $0.18\mu\text{m}$ ).

#### Electrochemical double layer capacitance determination:

Electrochemical double layer capacitance (EDLC) measurement was performed on Co-TAPA-OPE electrode before and after electrolysis. Cyclic voltammetry (CV) curves were then taken between 0 and 0.2 V vs. Ag/AgCl (1 M KCl) at various scan rate (mV/s) while keeping the solution still. Then, currents were extracted at 0.1 V vs. Ag/AgCl (1 M KCl) as a function of the scan rate, leading to a slope for each sample before and after electrolysis. The slope of the plot equals the capacitance of measured samples.

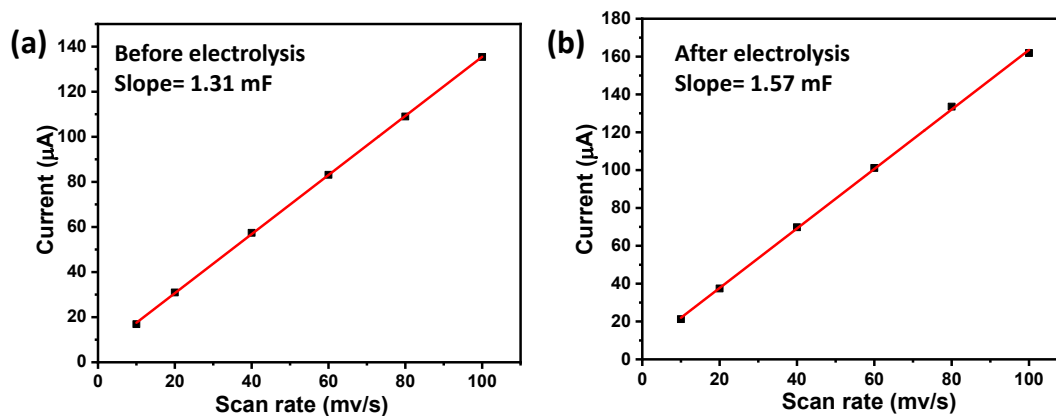

**Fig. S21.** Electrochemical double-layer capacitance with the CV curves acquired at different scanning rates from 10, 20 40, 60, 80, 100,  $\text{mV s}^{-1}$ . Current densities ( $j = j_{\text{anode}} - j_{\text{cathode}}$ ) as a function of scanning rates of with the corresponding slope being twice that of the  $C_{\text{dl}}$  values (a) before and (b) after electrolysis.

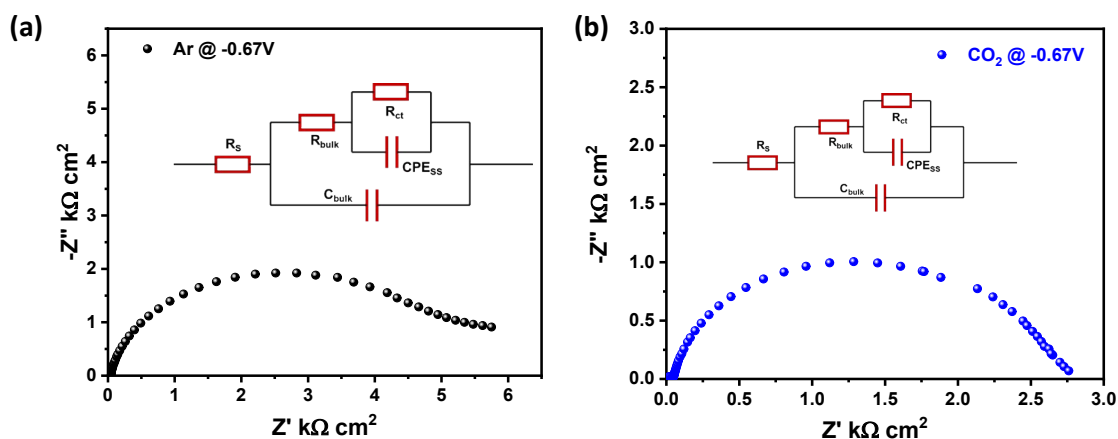

**Fig. S22.** Impedance spectra showing charge transfer resistance ( $R_{\text{ct}}$ ) in (a) Ar and, (b)  $\text{CO}_2$  at  $-0.67 \text{ V}$ .



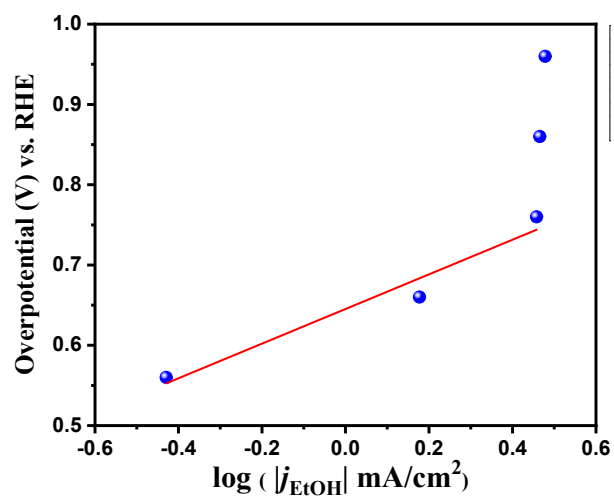

**Fig. S23.** Tafel plots of polarization overpotential ( $\eta$ ) versus ethanol partial current density.

**FE-SEM image of Co-TAPA-OPE after CO<sub>2</sub>RR measurement:**

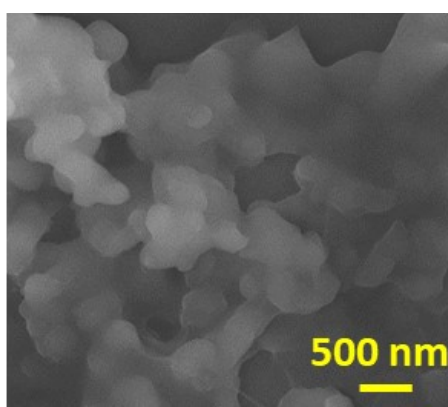

**Fig. S24a.** FE-SEM image for Co-TAPA-OPE after CO<sub>2</sub>RR measurement. The sample for SEM was collected by scratching the carbon paper after electrolysis.

### Elemental mapping of Co-TAPA-OPE after CO<sub>2</sub>RR:

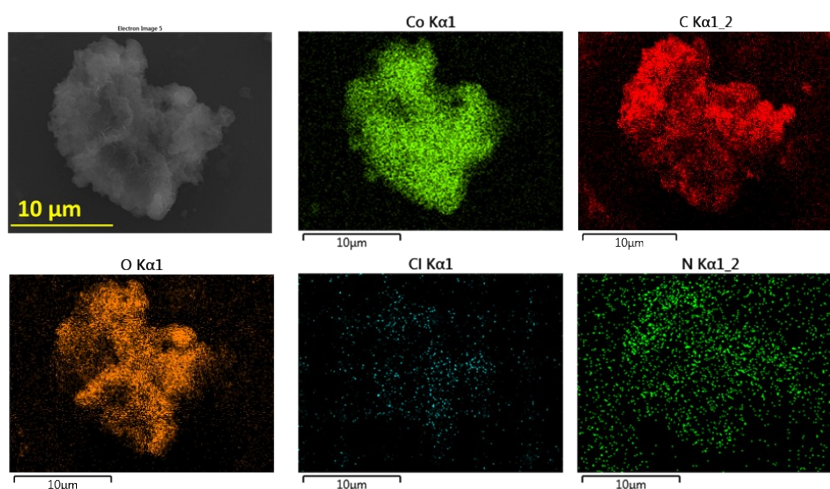

**Fig. S24b.** Elemental mapping for Co-TAPA-OPE after CO<sub>2</sub>RR.

### EDAX analysis for Co-TAPA-OPE after electrocatalytic CO<sub>2</sub>RR:

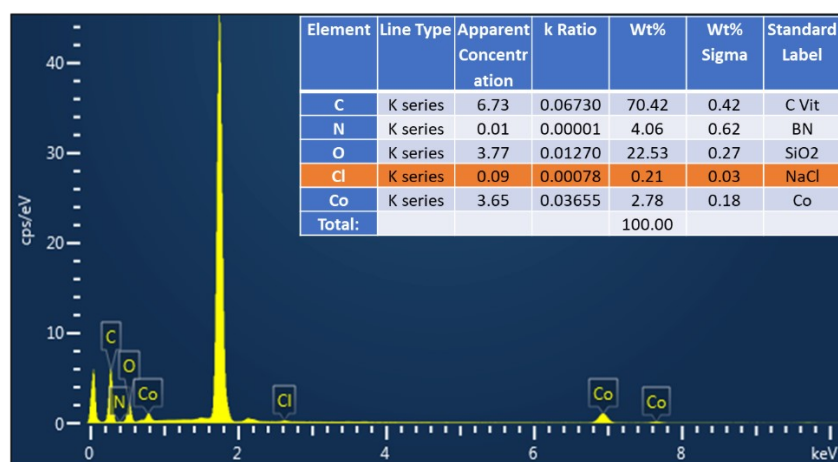

**Fig. S24c.** EDAX analysis for Co-TAPA-OPE after CO<sub>2</sub>RR.

**Table S3.** Comparison of electrochemical CO<sub>2</sub> reduction to ethanol performance with state-of-art single atom-based catalysts in H-type cell in aqueous medium.

| Sl. No. | Catalysts                        | Potential (V) vs. RHE | Partial Current density (mA cm <sup>-2</sup> ) | FE (%) for Ethanol | Electrolyte              | Ref.                                                  |
|---------|----------------------------------|-----------------------|------------------------------------------------|--------------------|--------------------------|-------------------------------------------------------|
| 1.      | Cu/C-0.4 (Cu single atom)        | -0.7 V                | 1.23                                           | 91                 | 0.1 M KHCO <sub>3</sub>  | <i>Nat. Energy</i> 2020, <b>5</b> , 623.              |
| 2.      | Cu-N-C                           | -1.2 V                | 16*                                            | 55                 | 0.1 M CsHCO <sub>3</sub> | <i>Angew. Chem., Int. Ed.</i> 2019, <b>58</b> , 15098 |
| 3.      | Co-Corrole                       | -0.8 V                | -2.5                                           | 48                 | 0.1 M NaClO <sub>4</sub> | <i>Nat. Commun.</i> 2019, <b>10</b> , 3864            |
| 4.      | Co-TAPA-OPE COF (Co single atom) | -0.67 V               | 2.9                                            | 66.8               | 0.2 M KHCO <sub>3</sub>  | <b>This work</b>                                      |

\* Total current density

**Table S4.** Comparison of electrochemical CO<sub>2</sub> reduction performance with COF-based catalysts in H-type cell.

| Sl. No. | Catalysts       | Potential (V) vs. RHE | Main product | FE (%) | Electrolyte             | Ref.                                             |
|---------|-----------------|-----------------------|--------------|--------|-------------------------|--------------------------------------------------|
| 1.      | COF-366-Co      | -1.05 V               | CO           | 91     | 0.5 M KHCO <sub>3</sub> | <i>Science</i> 2015, <b>349</b> , 1208.          |
| 2.      | COF-366-F-Co    | -0.67 V               | CO           | 87     | 0.5 M KHCO <sub>3</sub> | <i>J. Am. Chem. Soc.</i> 2018, <b>140</b> , 1116 |
| 3.      | TT-Por (Co)-COF | -0.9 V                | CO           | 93.2   | 0.5 M KHCO <sub>3</sub> | <i>ACS Energy Lett.</i> 2021, <b>6</b> , 3496    |

|            |                             |                |                 |             |                                   |                                                              |
|------------|-----------------------------|----------------|-----------------|-------------|-----------------------------------|--------------------------------------------------------------|
| 4.         | TTF-Por<br>(Co)-COF         | -0.7 V         | CO              | 95          | 0.5 M KHCO <sub>3</sub>           | <i>ACS Energy Lett.</i><br>2020, <b>5</b> , 1005             |
| 5.         | Co-TTCOF                    | -0.7 V         | CO              | 91.3        | 0.5 M KHCO <sub>3</sub>           | <i>Nat. Commun.</i><br>2020, <b>11</b> , 497.                |
| 6.         | CoPc-PDQ-<br>COF            | -0.66 V        | CO              | 96          | 0.5 M KHCO <sub>3</sub>           | <i>Angew. Chem. Int. Ed.</i> 2020, <b>59</b> ,<br>16587.     |
| 7.         | CoPc-PI-<br>COF-1           | -0.8 V         | CO              | 97          | 0.5 M KHCO <sub>3</sub>           | <i>J. Am. Chem. Soc</i><br>2021, <b>143</b> , 7104           |
| 8.         | Cu-Tph-<br>COF-Dct          | -0.9 V         | CH <sub>4</sub> | 80          | 1 M KOH                           | <i>Angew. Chem. Int. Ed.</i> 2022, <b>61</b> ,<br>e202114648 |
| 9.         | FN-CTF-<br>400              | -0.9 V         | CH <sub>4</sub> | 99.3        | 0.1 M KHCO <sub>3</sub>           | <i>Angew. Chem. Int. Ed.</i> 2018, <b>57</b> ,<br>13120      |
| <b>10.</b> | <b>Co-TAPA-<br/>OPE COF</b> | <b>-0.67 V</b> | <b>Ethanol</b>  | <b>66.8</b> | <b>0.2 M<br/>KHCO<sub>3</sub></b> | <b>This work</b>                                             |

### Electrocatalytic CO<sub>2</sub>RR using TAPA-OPE COF:

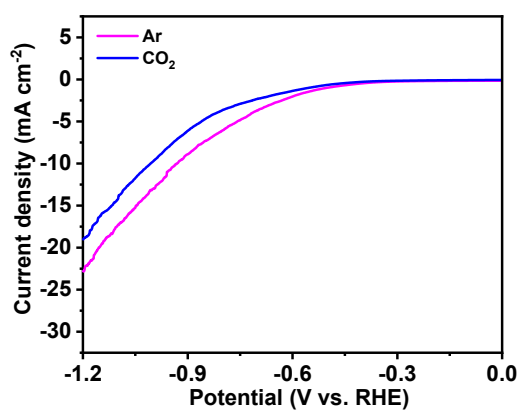

**Fig. S25.** LSV plot showing the current density in Ar and CO<sub>2</sub> atmosphere using TAPA-OPE COF.

### Chronoamperometric curve for TAPA-OPE COF:

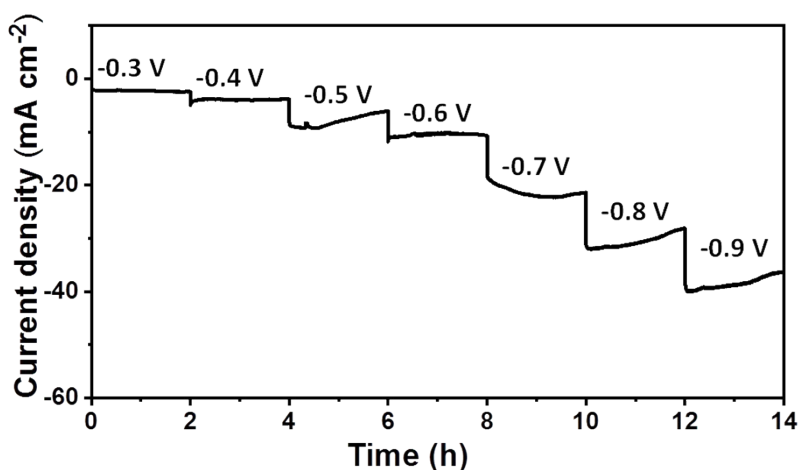

**Fig. S26.** Typical chronoamperometric curve of TAPA-OPE COF under bias from -0.3 V to -0.9 V in CO<sub>2</sub> saturated 0.2 M KHCO<sub>3</sub> solution.

### <sup>1</sup>H-NMR spectra for TAPA-OPE COF:

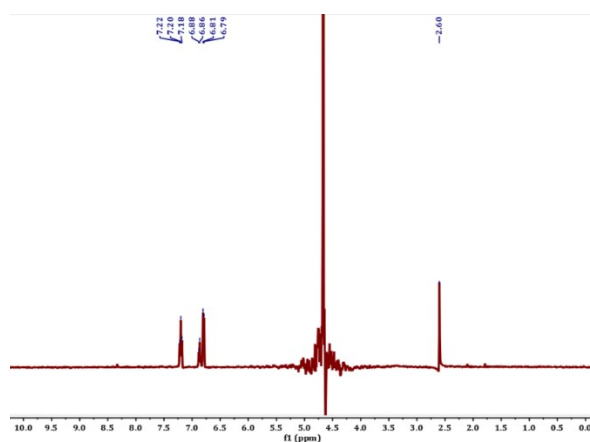

**Fig. S27.** <sup>1</sup>H-NMR spectra of the solution after performing chronoamperometric measurement with TAPA-OPE COF using bias from -0.3 V to -0.9 V through solvent presaturation method.

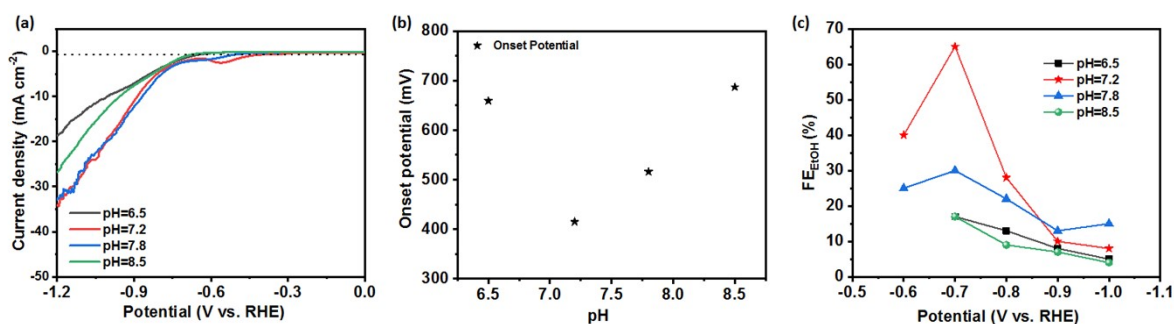

**Fig. S28.** (a) LSV plot at different pH in CO<sub>2</sub> (b) Onset potential at 1 mA cm<sup>2</sup> (c) FE<sub>EtOH</sub> calculated over potential range from -0.6 to -1 V at different pH.

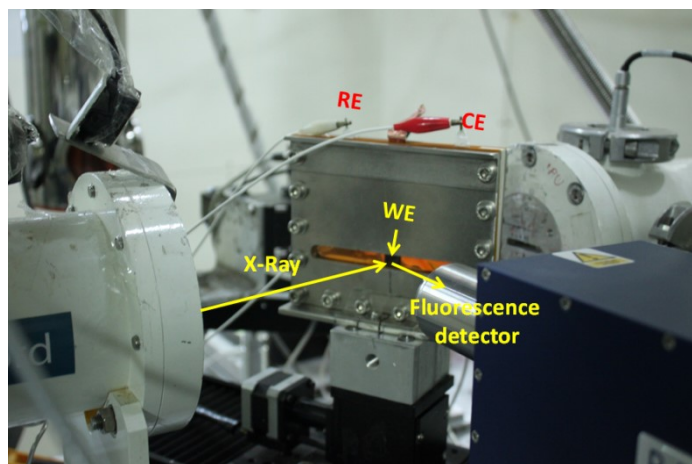

**Fig. S29.** Photograph of real time *in-situ* XAS set-up for electrochemical CO<sub>2</sub>RR. (b) EXAFS fitting in k space (c) After catalysis Co K-edge EXAFS experimental data for Co TAPA-OPE COF and corresponding fitting in Fourier transformed back into the wavevector space (q - space).

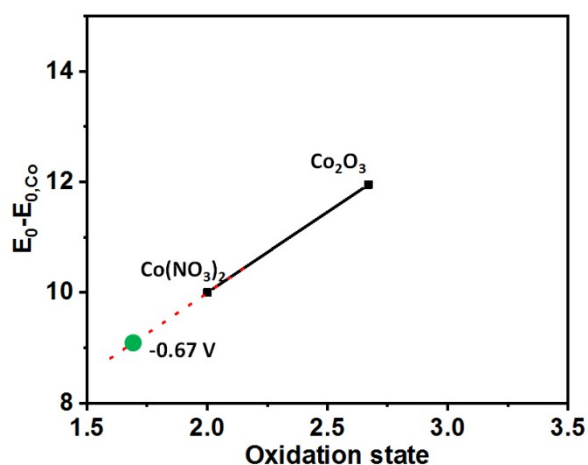

**Fig. S30.** Oxidation-state analysis by edge position fitting of XANES of Co-TAPA-OPE COF during electrolysis.

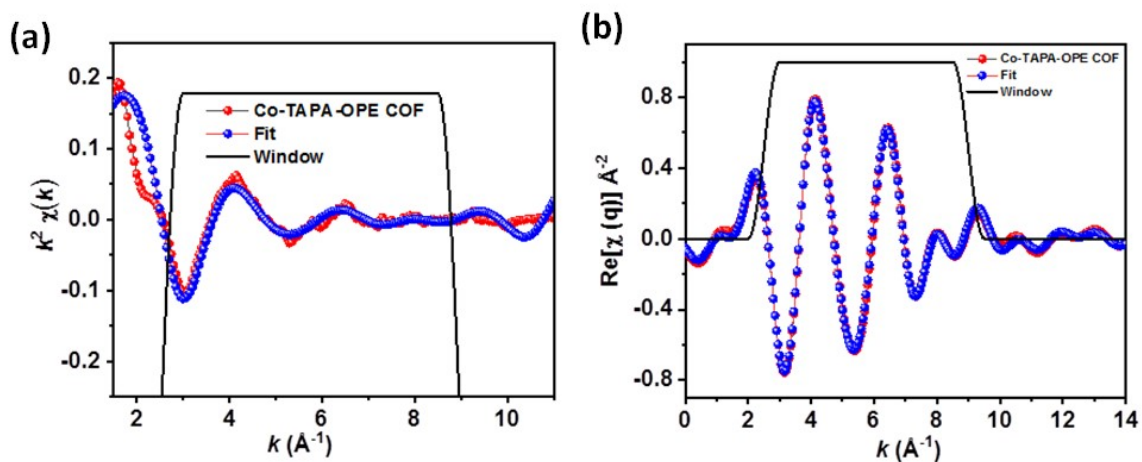

**Fig. S31.** (a) EXAFS fitting in k space (b) After catalysis Co K-edge EXAFS experimental data for Co-TAPA-OPE COF and corresponding fitting in Fourier transformed back into the wavevector space (q -space).

**Table S5.** CN, coordination number; R, the distance between absorber and backscatter atoms;  $\sigma^2$ , Debye-Waller factor (a measure of thermal and static disorder in absorber-scatterer distances); R factor is used to value the goodness of the fitting;  $S_0^2= 1$

| Sample                                  | Path  | CN    | R( $\text{\AA}$ ) | $\sigma^2(10^{-3}\text{\AA}^2)$ | R factor |
|-----------------------------------------|-------|-------|-------------------|---------------------------------|----------|
| Co-TAPA-OPE<br>COF (After<br>catalysis) | Co-N  | 2.002 | 2.07              | 12.1                            | 0.005    |
|                                         | Co-O  | 2.02  | 1.86              | 8.8                             |          |
|                                         | Co-Cl | 1.98  | 2.5               | 13.7                            |          |

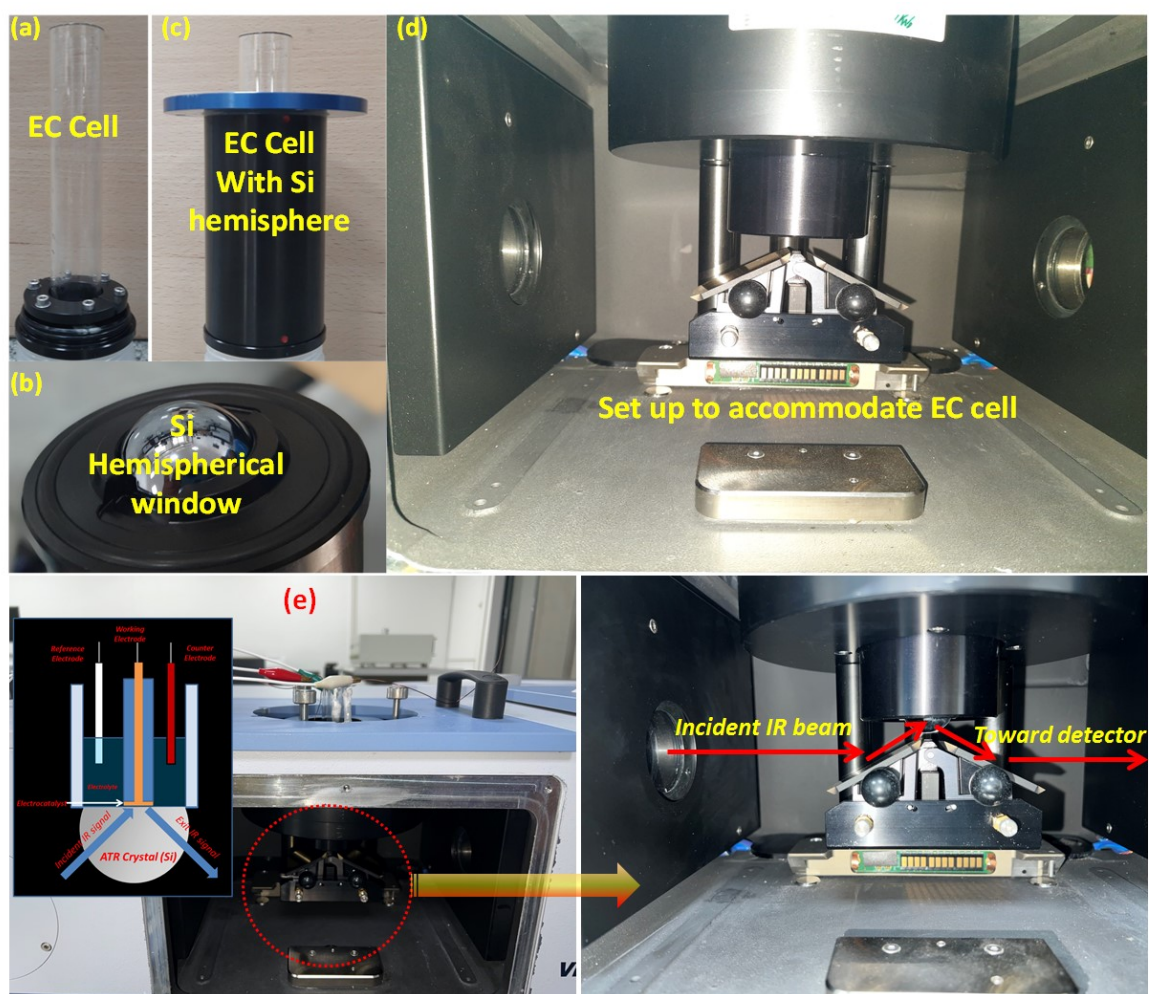

**Fig. S32.** (a) Electrochemical cell (EC) used for *in-situ* IR measurement (b) Picture of Si-hemisphere used during *in-situ* measurement (c) Photograph of EC cell connected with Si hemisphere (d) Attachments used during *in-situ* measurement. (e) Photograph of the overall set up including the schematic of the measurement process.

### **Computational details for mechanistic study:**

The electrocatalytic mechanisms were investigated based on Nørskov's computational hydrogen electrode (CHE) model. This model offers an effective method for examining proton-electron transport in electrocatalysis without explicitly treating solvated protons and is commonly used in theoretical studies of electrocatalysis. In CHE model, the energy of an [ $e^- + H^+$ ] pair is considered to be equal to half of the gaseous hydrogen ( $1/2 H_2$ ) at an equilibrium potential. Thus, the total Gibbs free energy of a proton-electron pair is calculated as:

$$G(e^- + H^+) = 1/2 G(H_2) - neU$$



where  $n$  is the number of electrons involved in the reaction ( $n = 1$ ),  $e$  is the electronic charge, and  $U$  is the external potential. For CO<sub>2</sub>RR, the corrections of zero-point energy ( $E_{ZPE}$ ), heat capacity ( $C_p$ ), temperature ( $T$ ) and entropy ( $S$ ) are introduced into the DFT-calculated total energy ( $E_{total}$ ) to determine the Gibbs free energy ( $G$ ) of each intermediate species at 298.15 K:

$$G = E_{total} + E_{ZPE} + \int C_p dT - TS$$

The Gibbs free energies ( $G$ ) for all the intermediate species were calculated by using  $E_{total}$  along with the aforementioned corrections and listed in Table S34. Hence, the Gibbs free reaction energy for each elementary step at 298.15 K should be:

$$\Delta G = \Delta E_{total} + \Delta E_{ZPE} + \int C_p dT - T\Delta S$$

where  $\Delta E_{total}$  is the difference of total electronic energy derived from DFT,  $\Delta E_{ZPE}$  is the difference of zero-point energy correction (ZPE),  $\int C_p dT$  is the enthalpy correction and  $T\Delta S$  is the entropy change, as shown in Table S34. The Gibbs free energy change ( $\Delta G$ ) for each elementary step was calculated as:

$$\Delta G = \sum G(\text{Product}) - \sum G(\text{Reactant})$$

For the elementary steps involving proton-coupled reduction:

$$\Delta G(U) = \sum G(U=0) + neU$$

where  $n$  is the number of electrons involved in the reaction,  $e$  is the electronic charge and  $U$  is the applied external potential.

In Fig. S29, all the possible pathways for CO<sub>2</sub> electroreduction to ethanol on Co<sup>2+</sup> metalated covalent organic framework based single atom catalyst were summarized.

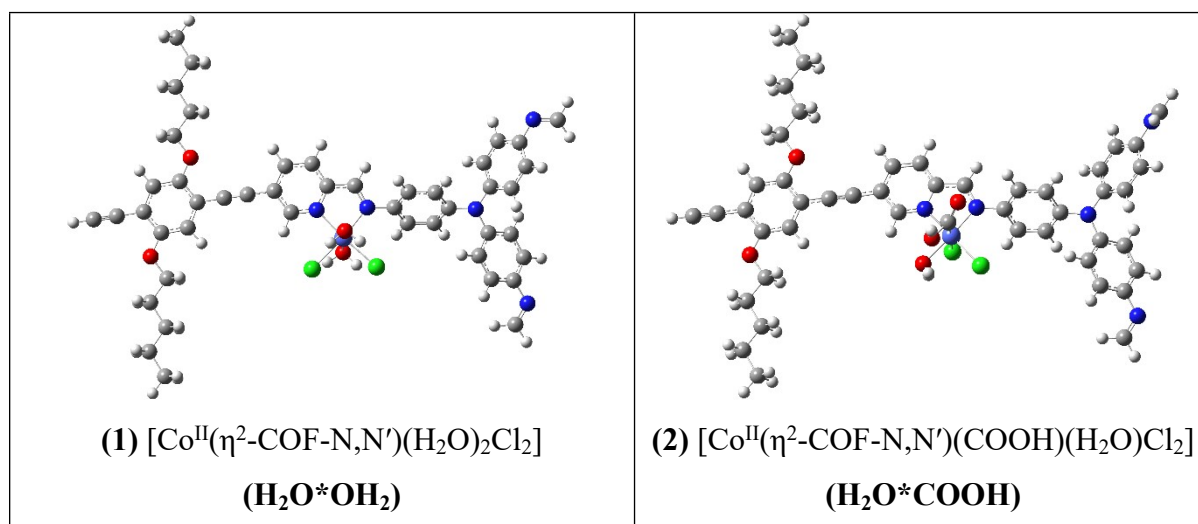

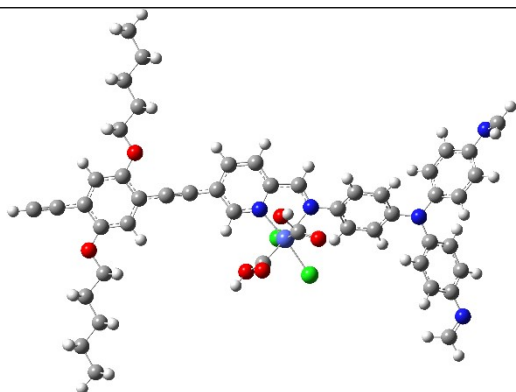

**(3)**  $[\text{Co}^{\text{II}}(\eta^2\text{-COF-N,N}')(\text{COOH})_2\text{Cl}_2]$   
**(HOOC\*COOH)**

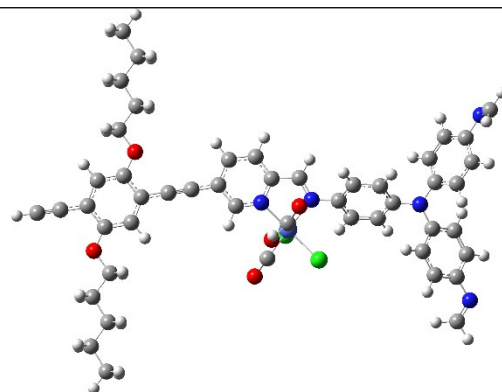

**(4)**  $[\text{Co}^{\text{II}}(\eta^2\text{-COF-N,N}')(\text{COOH})(\text{CO})\text{Cl}_2]$   
**(OC\*COOH)**

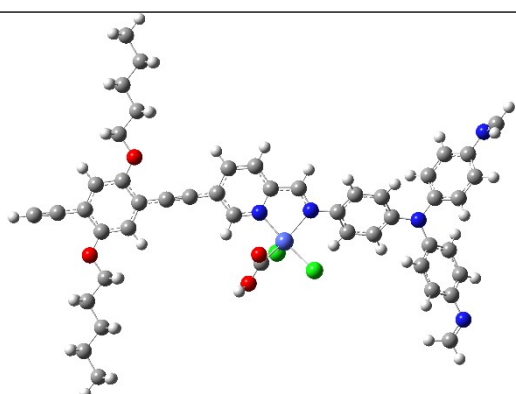

**(4a)**  $[\text{Co}^{\text{II}}(\eta^2\text{-COF-N,N}')(\text{COOH})\text{Cl}_2]$   
**(\*COOH)**

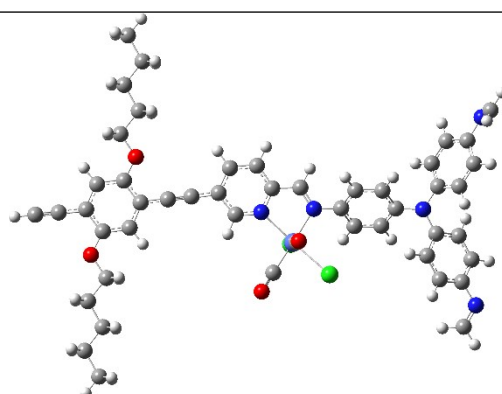

**(5)**  $[\text{Co}^{\text{II}}(\eta^2\text{-COF-N,N}')(\text{CO})_2\text{Cl}_2]$   
**(OC\*CO)**

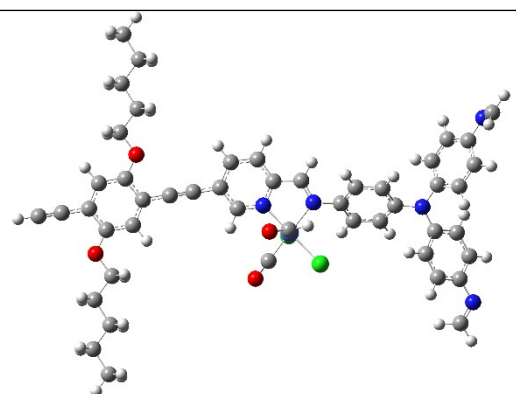

**(6)**  $[\text{Co}^{\text{II}}(\eta^2\text{-COF-N,N}')(\text{CHO})(\text{CO})\text{Cl}_2]$   
**(OC\*CHO)**

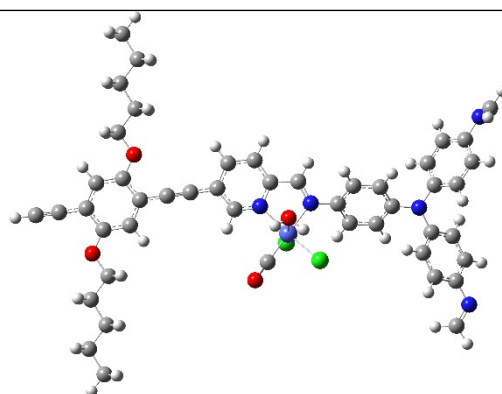

**(6a)**  $[\text{Co}^{\text{II}}(\eta^2\text{-COF-N,N}')(\text{H}_2\text{O})(\text{CO})\text{Cl}_2]$   
**(OC\*OH<sub>2</sub>)**

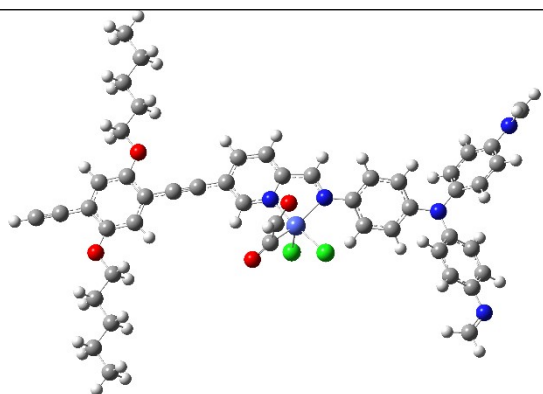

**(6b)**  $[\text{Co}^{\text{II}}(\eta^2\text{-COF-N,N}')(\text{COCHO})\text{Cl}_2]$   
 (\*COCHO)

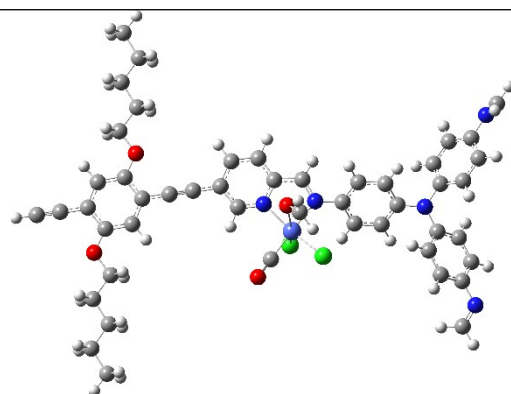

**(7)**  $[\text{Co}^{\text{II}}(\eta^2\text{-COF-N,N}')(\text{OCH}_2)(\text{CO})\text{Cl}_2]$   
 (OC\*OCH<sub>2</sub>)

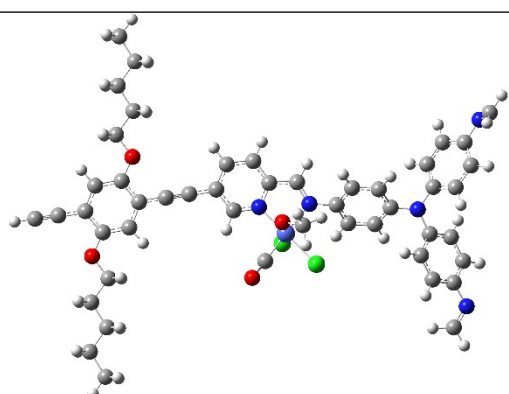

**(8)**  $[\text{Co}^{\text{II}}(\eta^2\text{-COF-N,N}')(\text{OCH}_3)(\text{CO})\text{Cl}_2]$   
 (OC\*OCH<sub>3</sub>)

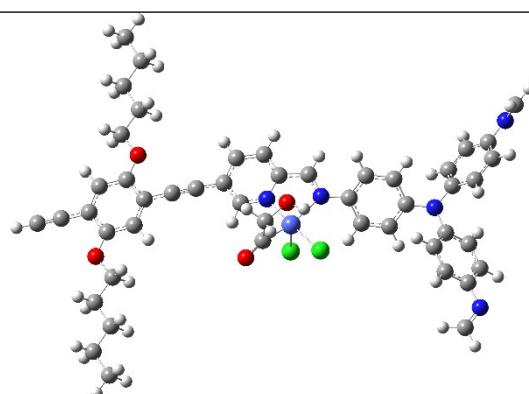

**(8a)**  $[\text{Co}^{\text{II}}(\eta^2\text{-COF-N,N}')(\text{COCH}_2\text{OH})\text{Cl}_2]$   
 (\*COCH<sub>2</sub>OH)

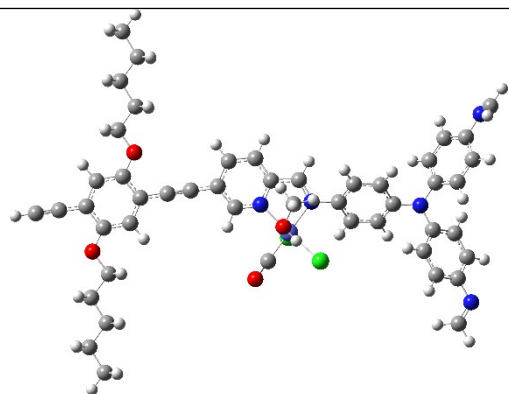

**(9)**  $[\text{Co}^{\text{II}}(\eta^2\text{-COF-N,N}')(\text{HOCH}_3)(\text{CO})\text{Cl}_2]$   
 (OC\*HOCH<sub>3</sub>)

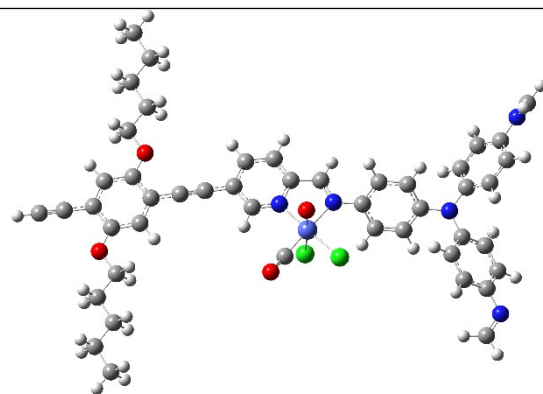

**(9a)**  $[\text{Co}^{\text{II}}(\eta^2\text{-COF-N,N}')(\text{O})(\text{CO})\text{Cl}_2]$   
 (OC\*O)

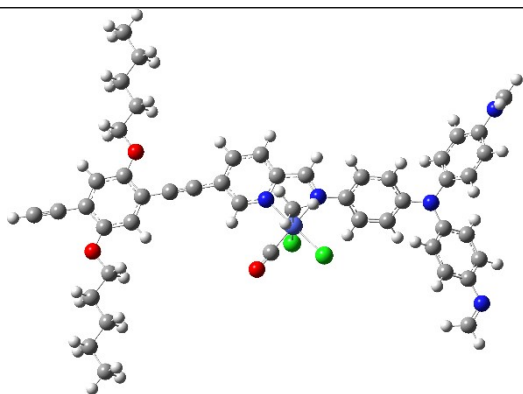

**(10)**  $[\text{Co}^{\text{II}}(\eta^2\text{-COF-N,N}')(\text{CH}_3)(\text{CO})\text{Cl}_2]$   
**(OC\*CH<sub>3</sub>)**

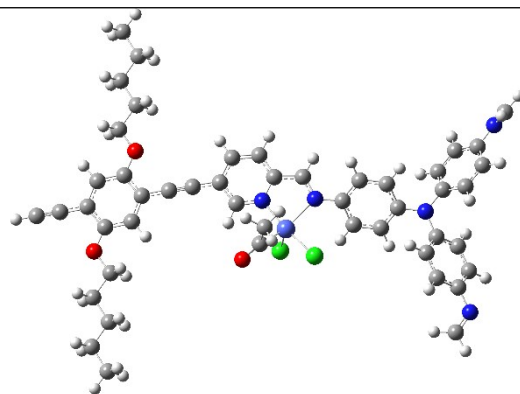

**(10a)**  $[\text{Co}^{\text{II}}(\eta^2\text{-COF-N,N}')(\text{COCH}_3)\text{Cl}_2]$   
**(\*COCH<sub>3</sub>)**

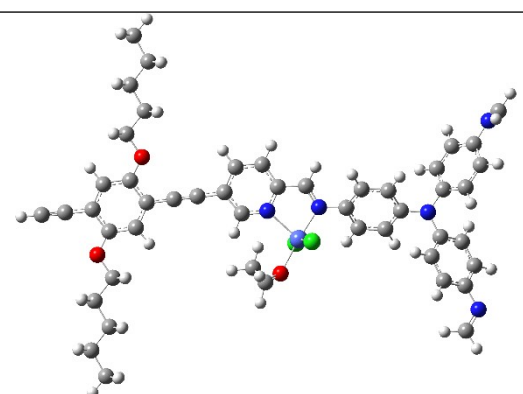

**(11)**  $[\text{Co}^{\text{II}}(\eta^2\text{-COF-N,N}')(\text{OCHCH}_3)\text{Cl}_2]$   
**(\*OCHCH<sub>3</sub>)**

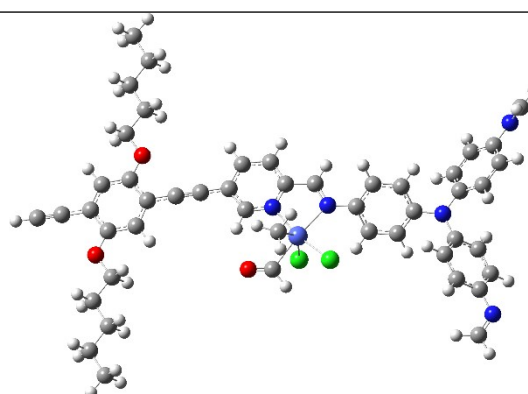

**(11a)**  $[\text{Co}^{\text{II}}(\eta^2\text{-COF-N,N}')(\text{CH}_3)(\text{CHO})\text{Cl}_2]$   
**(OHC\*CH<sub>3</sub>)**

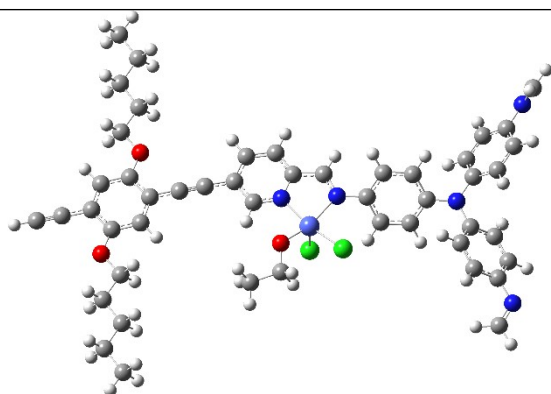

**(12)**  $[\text{Co}^{\text{II}}(\eta^2\text{-COF-N,N}')(\text{OCH}_2\text{CH}_3)\text{Cl}_2]$   
**(\*OCH<sub>2</sub>CH<sub>3</sub>)**

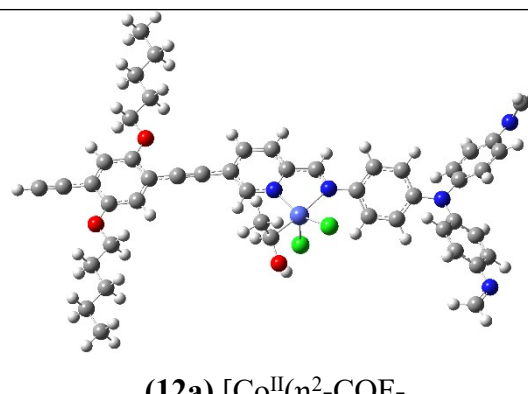

**(12a)**  $[\text{Co}^{\text{II}}(\eta^2\text{-COF-N,N}')(\text{CH}(\text{OH})\text{CH}_3)\text{Cl}_2]$   
**(\*CH(OH)CH<sub>3</sub>)**

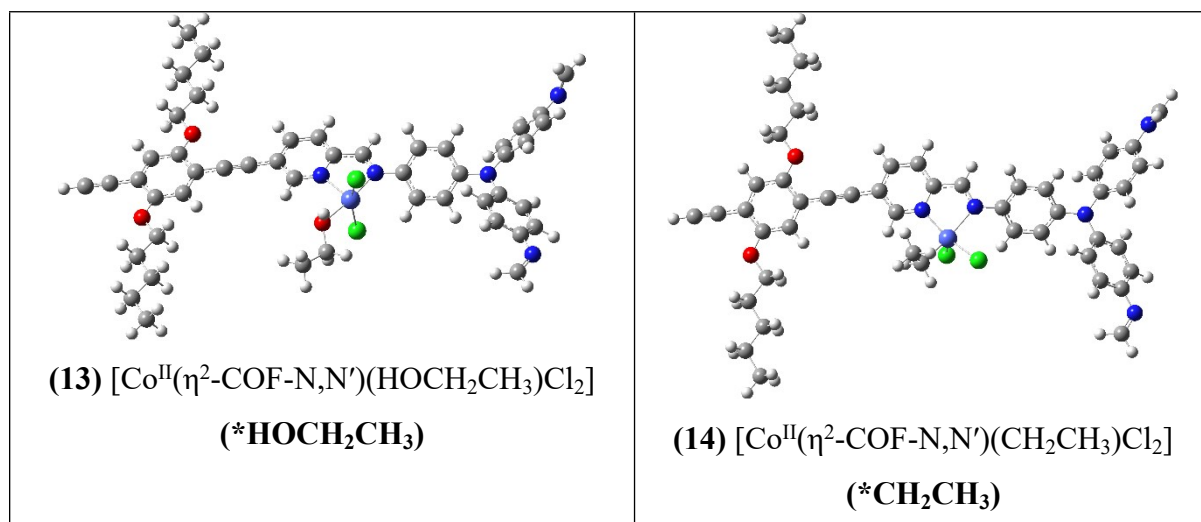

Fig. S33. Optimized geometries of all possible intermediates.

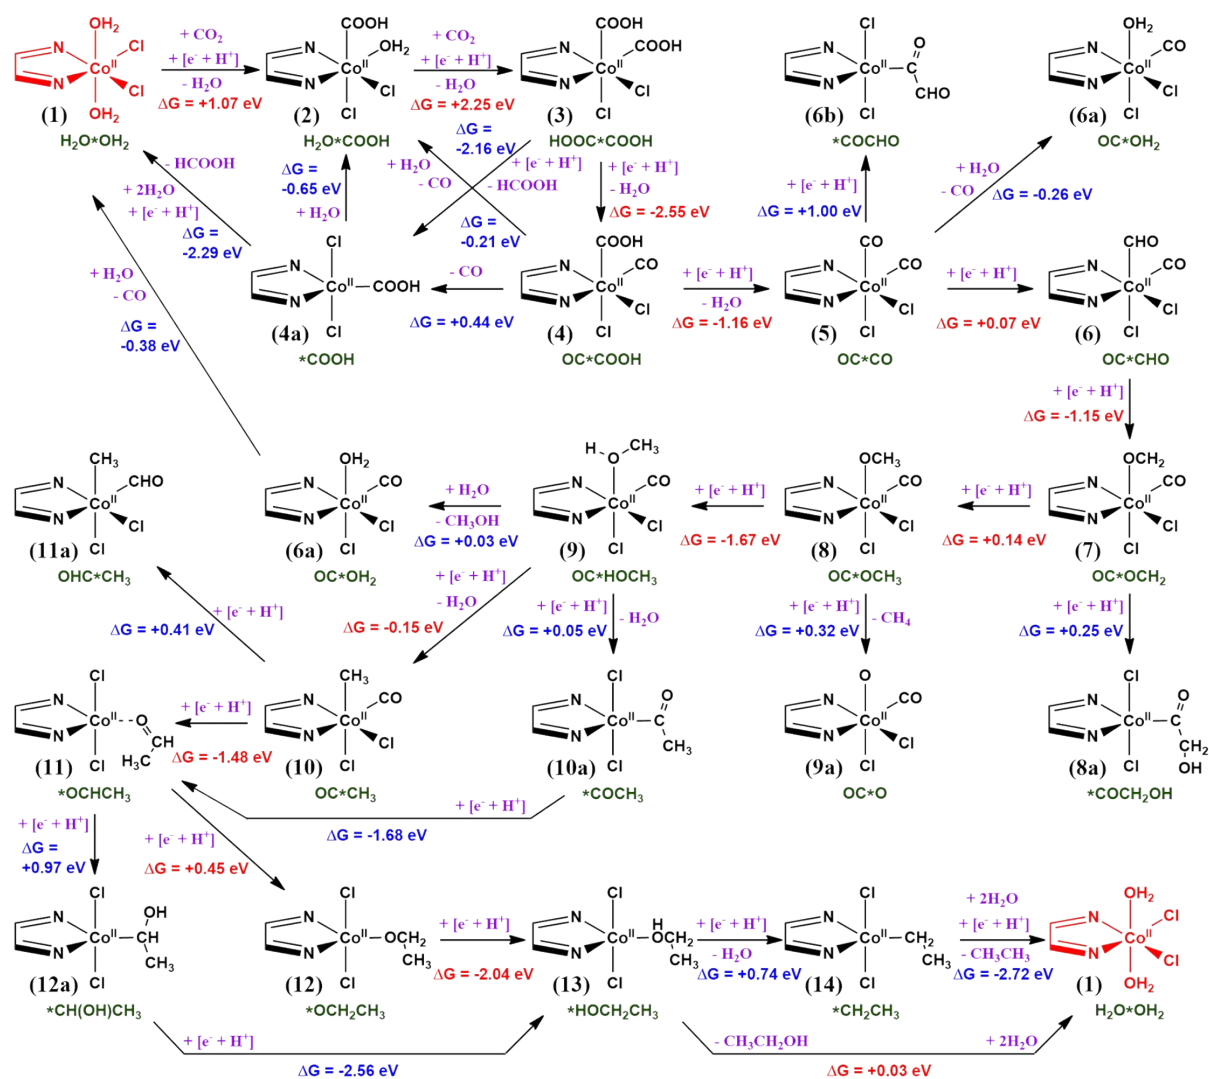

**Fig. S34.** Complete mechanism for electrocatalytic reduction of CO<sub>2</sub> to CH<sub>3</sub>CH<sub>2</sub>OH with respective relative Gibbs free energy values computed by DFT, at an applied potential of -0.67 V vs. RHE.

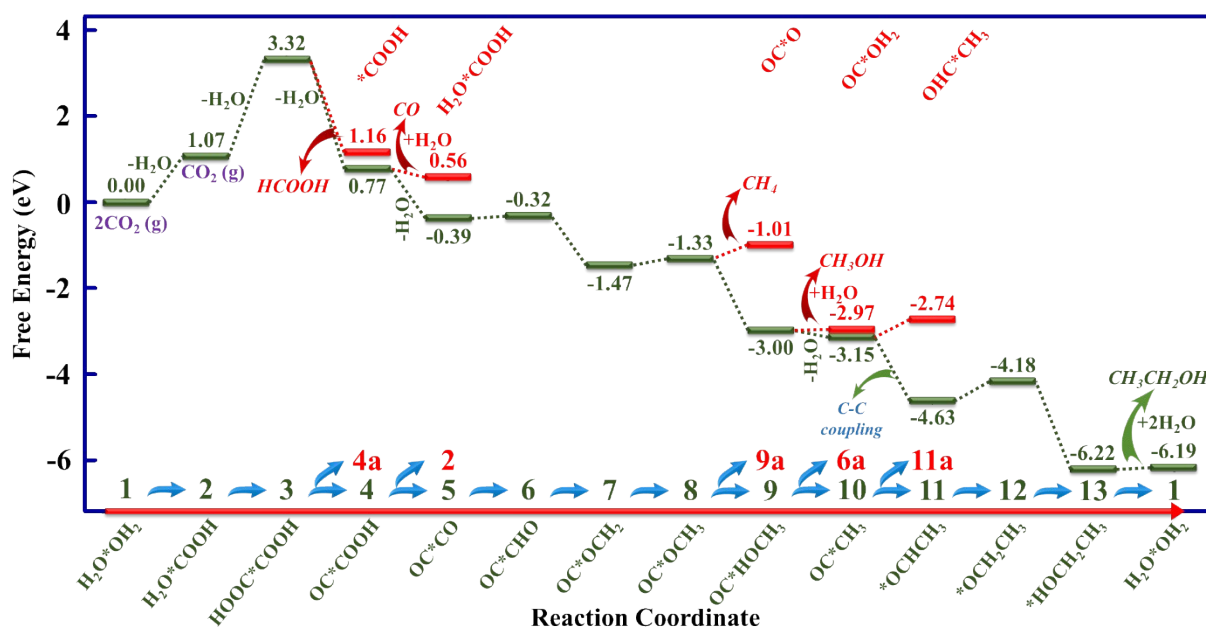

**Fig. S35.** Relative Gibbs free energy ( $\Delta G$ ) diagram computed by DFT, at an applied potential of -0.67 V vs. RHE for CO<sub>2</sub> to CH<sub>3</sub>CH<sub>2</sub>OH reduction process occurring on Co-TAPA-OPE COF. Asterisk (\*) denotes Co-catalytic center adsorbed with intermediate species. The CH<sub>3</sub>CH<sub>2</sub>OH synthesis main pathway is drawn in green, whereas the other side products formation pathways are shown in red.

### Cartesian coordinates of the computed structures

Coordinates are given in standard XYZ format

DFT-optimized geometry of **(1)** [Co<sup>II</sup>( $\eta^2$ -COF-N,N')(H<sub>2</sub>O)<sub>2</sub>Cl<sub>2</sub>] (doublet) (H<sub>2</sub>O\*OH<sub>2</sub>), computed at the UB3LYP-D3/ LANL2DZ (Co)/ 6-31+G\* (HCNOCl) level in absence of any solvent.

| Atom | x           | y          | z           |
|------|-------------|------------|-------------|
| C    | -5.41513200 | 0.85701600 | -0.07343500 |
| C    | -4.20941100 | 1.02914200 | -0.07378200 |
| C    | -2.80937100 | 1.22777200 | -0.07072900 |

|    |             |             |             |
|----|-------------|-------------|-------------|
| C  | -2.23449900 | 2.51390800  | -0.11109400 |
| C  | -1.93880300 | 0.11308600  | -0.01893000 |
| C  | -0.85069400 | 2.63497100  | -0.10779100 |
| H  | -2.87476600 | 3.38968400  | -0.14472000 |
| N  | -0.61384800 | 0.23564600  | -0.01468700 |
| H  | -2.31867800 | -0.90080300 | 0.03537400  |
| C  | -0.06324700 | 1.47973800  | -0.06374000 |
| H  | -0.37454200 | 3.61047200  | -0.14023800 |
| C  | 1.38238900  | 1.49487900  | -0.10165300 |
| N  | 2.01121600  | 0.36378600  | -0.10667100 |
| H  | 1.91429900  | 2.44531400  | -0.16539200 |
| C  | 3.42646500  | 0.36925800  | -0.12309700 |
| C  | 4.15882700  | 1.16229900  | 0.77228400  |
| C  | 4.10605900  | -0.44355300 | -1.04151000 |
| C  | 5.55019300  | 1.13552500  | 0.75943800  |
| H  | 3.63565100  | 1.74621700  | 1.52506600  |
| C  | 5.49222200  | -0.43851800 | -1.08311800 |
| H  | 3.53471000  | -1.05634000 | -1.72752300 |
| C  | 6.23663200  | 0.33433600  | -0.17040700 |
| H  | 6.11026600  | 1.71744500  | 1.48424800  |
| H  | 6.01240100  | -1.05616100 | -1.80782400 |
| N  | 7.64818900  | 0.27810200  | -0.17400300 |
| C  | 8.41261800  | 1.43524700  | 0.12903600  |
| C  | 8.30757000  | -0.96364600 | -0.38752900 |
| C  | 8.07697100  | 2.67926500  | -0.43294700 |
| C  | 9.50754400  | 1.35977200  | 1.00544800  |
| C  | 7.81614200  | -2.14409800 | 0.19402600  |
| C  | 9.47614500  | -1.02243100 | -1.16552100 |
| C  | 8.81079000  | 3.81769000  | -0.11630400 |
| H  | 7.22855900  | 2.74674800  | -1.10732400 |
| C  | 10.26425200 | 2.49326100  | 1.29125900  |
| H  | 9.75767800  | 0.40813200  | 1.46471500  |
| C  | 8.45910300  | -3.35933700 | -0.02579000 |
| H  | 6.92722000  | -2.10689800 | 0.81659700  |
| C  | 10.13857200 | -2.23170000 | -1.35127200 |
| H  | 9.86770300  | -0.11227500 | -1.60981900 |
| C  | 9.93383000  | 3.73815500  | 0.72463700  |
| H  | 8.54260800  | 4.78191200  | -0.53827000 |
| H  | 11.08866500 | 2.42213700  | 1.99573600  |
| C  | 9.62388300  | -3.42298700 | -0.81254500 |
| H  | 8.07876600  | -4.25759900 | 0.45285200  |
| H  | 11.05037500 | -2.27627300 | -1.93970400 |
| Co | 0.77199400  | -1.21015800 | 0.17465900  |
| Cl | -0.84285700 | -2.83905600 | 0.57347500  |
| Cl | 2.49513900  | -2.72133000 | 0.50664600  |
| O  | 0.76533600  | -1.96902000 | -2.02498600 |
| O  | 0.84844100  | -0.85450000 | 2.46818600  |
| H  | 1.45804000  | -2.62021900 | -1.79902900 |
| H  | -0.06094300 | -2.47757000 | -1.93054600 |
| H  | 1.64851500  | -1.40610900 | 2.56158100  |
| H  | 0.11674900  | -1.47723300 | 2.63743900  |
| C  | -6.81262900 | 0.62921100  | -0.06960200 |
| C  | -7.71922800 | 1.71639400  | -0.14169800 |
| C  | -7.30868800 | -0.68879500 | 0.00786900  |
| C  | -9.09022700 | 1.45921300  | -0.13502700 |
| O  | -7.16520800 | 2.95671800  | -0.21342600 |
| C  | -8.67891200 | -0.94420800 | 0.01505100  |
| H  | -6.59027400 | -1.49700600 | 0.06306600  |
| C  | -9.58550600 | 0.14413500  | -0.05770500 |
| H  | -9.80893500 | 2.26723100  | -0.18910200 |

|   |              |             |             |
|---|--------------|-------------|-------------|
| C | -8.02084500  | 4.10098200  | -0.28575500 |
| O | -9.23194900  | -2.18237300 | 0.08815200  |
| C | -10.99164900 | -0.08414800 | -0.05271000 |
| H | -8.65924700  | 4.03039900  | -1.17889000 |
| H | -8.67093500  | 4.13413300  | 0.60108100  |
| C | -7.13389200  | 5.33552200  | -0.35182100 |
| C | -8.37430700  | -3.32630500 | 0.16724700  |
| C | -12.19149000 | -0.25650500 | -0.04981700 |
| H | -6.47448800  | 5.24823300  | -1.22551600 |
| H | -6.48703300  | 5.35138900  | 0.53536700  |
| C | -7.94952500  | 6.63232100  | -0.43355900 |
| H | -7.72381100  | -3.36252500 | -0.71923900 |
| H | -7.73621000  | -3.24901800 | 1.06000900  |
| C | -9.25798200  | -4.56238600 | 0.23988500  |
| H | -13.24590400 | -0.42139900 | -0.04623100 |
| H | -8.61624800  | 6.70470200  | 0.43900500  |
| H | -8.60312400  | 6.60219800  | -1.31844700 |
| C | -7.07033500  | 7.88846100  | -0.50022600 |
| H | -9.91733900  | -4.47269300 | 1.11309800  |
| H | -9.90600000  | -4.58432800 | -0.64607700 |
| C | -8.43613400  | -5.85507200 | 0.32728900  |
| H | -6.40427700  | 7.81658100  | -1.37225600 |
| H | -6.41744200  | 7.91897300  | 0.38409500  |
| C | -7.88641900  | 9.18379000  | -0.58186100 |
| H | -7.78086000  | -5.81769100 | 1.21059400  |
| H | -7.77015600  | -5.92951500 | -0.54567200 |
| C | -9.31003400  | -7.11441200 | 0.40207700  |
| H | -8.53842800  | 9.29527200  | 0.29411700  |
| H | -7.23563300  | 10.06501200 | -0.62846000 |
| H | -8.52532300  | 9.19206300  | -1.47439900 |
| H | -9.97492700  | -7.04072900 | 1.27480900  |
| H | -9.96472300  | -7.15217600 | -0.48062700 |
| C | -8.48796000  | -8.40566400 | 0.48892800  |
| H | -7.84688000  | -8.40628200 | 1.37989600  |
| H | -9.13486800  | -9.28953700 | 0.54154300  |
| H | -7.83691400  | -8.51883100 | -0.38754200 |
| N | 10.63918400  | 4.92935900  | 0.99803200  |
| N | 10.33873500  | -4.61692400 | -1.04772000 |
| C | 9.71188300   | -5.70951200 | -1.24352800 |
| H | 10.28542400  | -6.62643900 | -1.38179300 |
| H | 8.61647700   | -5.78608900 | -1.29444100 |
| C | 11.90875600  | 4.91147800  | 1.11071300  |
| H | 12.42701300  | 5.83680900  | 1.36352200  |
| H | 12.52429300  | 4.01385500  | 0.95523800  |

-----

Total electronic Energy ( $E_{\text{total}}$ ) = -3422.662896 (Hartree/Particle).

DFT-optimized geometry of **(2)**  $[\text{Co}^{\text{II}}(\eta^2\text{-COF-N,N})(\text{COOH})(\text{H}_2\text{O})\text{Cl}_2]$  (singlet) **( $\text{H}_2\text{O}^*\text{COOH}$ )**, computed at the B3LYP-D3/ LANL2DZ (Co)/ 6-31+G\* (HCNOCl) level in absence of any solvent.

-----

| Atom | x          | y          | z          |
|------|------------|------------|------------|
| C    | 5.42209700 | 0.77769800 | 0.07301600 |
| C    | 4.21758800 | 0.95762700 | 0.08428000 |

-----



|    |              |             |             |
|----|--------------|-------------|-------------|
| C  | 2.82396000   | 1.19588900  | 0.10056500  |
| C  | 2.29354800   | 2.49868900  | 0.21933000  |
| C  | 1.91324700   | 0.12072500  | -0.00545500 |
| C  | 0.91646300   | 2.67924100  | 0.23515400  |
| H  | 2.96901800   | 3.34427200  | 0.29998500  |
| N  | 0.60003100   | 0.31181300  | 0.00823100  |
| H  | 2.24763600   | -0.90468800 | -0.10409100 |
| C  | 0.08372200   | 1.56158600  | 0.12949900  |
| H  | 0.48178100   | 3.66932100  | 0.33193500  |
| C  | -1.36058400  | 1.58589500  | 0.17980900  |
| N  | -1.97889100  | 0.45269800  | 0.11877800  |
| H  | -1.90240400  | 2.52098000  | 0.31178800  |
| C  | -3.39094200  | 0.40165400  | 0.14623900  |
| C  | -4.14295200  | 1.19875800  | -0.72760900 |
| C  | -4.03205600  | -0.46022600 | 1.04800200  |
| C  | -5.53217300  | 1.13362900  | -0.70428800 |
| H  | -3.63326600  | 1.80220100  | -1.47314500 |
| C  | -5.41738600  | -0.49354800 | 1.09340100  |
| H  | -3.42864200  | -1.07179400 | 1.70923500  |
| C  | -6.18844100  | 0.28737700  | 0.20850000  |
| H  | -6.11366700  | 1.71608200  | -1.41144900 |
| H  | -5.91560900  | -1.14398500 | 1.80463100  |
| N  | -7.59765600  | 0.19746700  | 0.22113500  |
| C  | -8.39048300  | 1.34370900  | -0.05235600 |
| C  | -8.22866100  | -1.05865600 | 0.43636800  |
| C  | -8.08759900  | 2.57771400  | 0.54944300  |
| C  | -9.50278800  | 1.25890000  | -0.90433200 |
| C  | -7.72622300  | -2.22327400 | -0.16701700 |
| C  | -9.37937000  | -1.14791300 | 1.23765600  |
| C  | -8.87105900  | 3.69817700  | 0.29440700  |
| H  | -7.24116500  | 2.64515300  | 1.22627900  |
| C  | -10.28310400 | 2.38396700  | -1.16338800 |
| H  | -9.76071400  | 0.30391000  | -1.35202700 |
| C  | -8.33946900  | -3.45325700 | 0.05518400  |
| H  | -6.85137500  | -2.16133000 | -0.80729700 |
| C  | -10.01343600 | -2.37193500 | 1.42568500  |
| H  | -9.77967400  | -0.25003300 | 1.69884000  |
| C  | -9.96506800  | 3.62558300  | -0.58460500 |
| H  | -8.65024800  | 4.64718400  | 0.77456700  |
| H  | -11.15728200 | 2.29203400  | -1.80209200 |
| C  | -9.48577100  | -3.54753300 | 0.86561900  |
| H  | -7.95131200  | -4.33979200 | -0.43885600 |
| H  | -10.91136900 | -2.44013300 | 2.03285600  |
| Co | -0.78536500  | -1.05495400 | -0.12633700 |
| C  | 6.82186600   | 0.56474200  | 0.06074000  |
| C  | 7.71155800   | 1.66566200  | 0.14027900  |
| C  | 7.33868100   | -0.74437200 | -0.02969900 |
| C  | 9.08654900   | 1.43049300  | 0.12594500  |
| O  | 7.13822100   | 2.89558700  | 0.22609100  |
| C  | 8.71271800   | -0.97749400 | -0.04278400 |
| H  | 6.63366800   | -1.56410600 | -0.08721400 |
| C  | 9.60226800   | 0.12441900  | 0.03534600  |
| H  | 9.79229600   | 2.24951800  | 0.18461800  |
| C  | 7.97485500   | 4.05305300  | 0.31833400  |
| O  | 9.28621100   | -2.20608000 | -0.12630800 |
| C  | 11.01176500  | -0.08171700 | 0.02340000  |
| H  | 8.61558300   | 3.97644500  | 1.20915400  |
| H  | 8.62250100   | 4.11330700  | -0.56878700 |
| C  | 7.06686300   | 5.27058200  | 0.40862500  |
| C  | 8.44888900   | -3.36416100 | -0.20019500 |

|    |              |             |             |
|----|--------------|-------------|-------------|
| C  | 12.21410700  | -0.23496300 | 0.01459500  |
| H  | 6.41166800   | 5.15622200  | 1.28234200  |
| H  | 6.41746500   | 5.29119100  | -0.47663900 |
| C  | 7.86009800   | 6.57971800  | 0.51164800  |
| H  | 7.80368400   | -3.41155100 | 0.68977800  |
| H  | 7.80489800   | -3.29886300 | -1.09004400 |
| C  | 9.35377900   | -4.58469100 | -0.27693400 |
| H  | 13.27115400  | -0.38217000 | 0.00665500  |
| H  | 8.52287300   | 6.67946500  | -0.36121900 |
| H  | 8.51660100   | 6.54501900  | 1.39417300  |
| C  | 6.95916300   | 7.81877600  | 0.60336300  |
| H  | 10.00821800  | -4.48291300 | -1.15245700 |
| H  | 10.00523400  | -4.59543500 | 0.60658500  |
| C  | 8.55497900   | -5.89182200 | -0.36183900 |
| H  | 6.29705000   | 7.71941000  | 1.47565800  |
| H  | 6.30332200   | 7.85384400  | -0.27860900 |
| C  | 7.75271300   | 9.12648700  | 0.70647400  |
| H  | 7.89710200   | -5.86640600 | -1.24389900 |
| H  | 7.89291400   | -5.97799400 | 0.51313300  |
| C  | 9.45074600   | -7.13561600 | -0.43869000 |
| H  | 8.40015700   | 9.26532900  | -0.16898000 |
| H  | 7.08666600   | 9.99505700  | 0.77076100  |
| H  | 8.39381100   | 9.12980500  | 1.59744100  |
| H  | 10.11244200  | -7.05004100 | -1.31268500 |
| H  | 10.10761200  | -7.16178500 | 0.44266600  |
| C  | 8.65156600   | -8.44121500 | -0.52393200 |
| H  | 8.00923100   | -8.45355200 | -1.41402800 |
| H  | 9.31391900   | -9.31340000 | -0.57765500 |
| H  | 8.00447000   | -8.56606400 | 0.35390800  |
| N  | -10.72112600 | 4.80008500  | -0.79127400 |
| N  | -10.16945000 | -4.75877200 | 1.10544800  |
| C  | -9.51398300  | -5.83721000 | 1.28527000  |
| H  | -10.06346200 | -6.76810900 | 1.42817900  |
| H  | -8.41639300  | -5.88774100 | 1.31856000  |
| C  | -11.20372900 | 5.05919100  | -1.94201500 |
| H  | -11.81659300 | 5.95247500  | -2.06578200 |
| H  | -11.03038100 | 4.43840700  | -2.83278400 |
| Cl | -2.35545700  | -2.65555800 | -0.52218200 |
| Cl | -0.66389900  | -1.38792500 | 2.22712600  |
| C  | -0.77944400  | -0.76516000 | -2.03644200 |
| O  | -1.28781700  | 0.14623300  | -2.65290800 |
| O  | -0.04402800  | -1.72601300 | -2.67789500 |
| H  | -0.10030800  | -1.54809100 | -3.63855000 |
| O  | 0.57472900   | -2.53310100 | -0.20946800 |
| H  | 0.22591400   | -3.14627700 | -0.88562700 |
| H  | 0.36559100   | -2.92457100 | 0.66733900  |

---

Total electronic Energy ( $E_{\text{total}}$ ) = -3535.376832 (Hartree/Particle).

DFT-optimized geometry of **(3)**  $[\text{Co}^{\text{II}}(\eta^2\text{-COF-N,N}')(\text{COOH})_2\text{Cl}_2]$  (doublet) (**HOOC\*COOH**), computed at the UB3LYP-D3/ LANL2DZ (Co)/ 6-31+G\* (HCNOCl) level in absence of any solvent.

---

| Atom | x | y | z |
|------|---|---|---|
|------|---|---|---|

---

|    |              |             |             |
|----|--------------|-------------|-------------|
| C  | 5.43091200   | 0.87030600  | 0.07311800  |
| C  | 4.22527200   | 1.04207800  | 0.05230300  |
| C  | 2.83012000   | 1.26968000  | 0.03055300  |
| C  | 2.28410900   | 2.56672300  | 0.11412700  |
| C  | 1.93226300   | 0.18383300  | -0.07611100 |
| C  | 0.90516500   | 2.72098700  | 0.11150400  |
| H  | 2.94519400   | 3.42369500  | 0.19395000  |
| N  | 0.61486800   | 0.34515100  | -0.10450500 |
| H  | 2.29877400   | -0.83306700 | -0.12205500 |
| C  | 0.08529600   | 1.59175000  | 0.00832600  |
| H  | 0.45281200   | 3.70418000  | 0.20069800  |
| C  | -1.35899100  | 1.65741900  | 0.08034300  |
| N  | -2.02856100  | 0.55511400  | 0.04121200  |
| H  | -1.84685600  | 2.62153800  | 0.23367900  |
| C  | -3.43039800  | 0.51879800  | 0.10766400  |
| C  | -4.22593900  | 1.41928300  | -0.62068000 |
| C  | -4.04014000  | -0.46158400 | 0.90708800  |
| C  | -5.61055000  | 1.33849500  | -0.55782700 |
| H  | -3.75646900  | 2.13401900  | -1.29181000 |
| C  | -5.42266100  | -0.51894100 | 0.99376000  |
| H  | -3.41445800  | -1.14376600 | 1.47008200  |
| C  | -6.23124900  | 0.36561100  | 0.25186500  |
| H  | -6.22026300  | 2.00538500  | -1.15852000 |
| H  | -5.88876200  | -1.26530400 | 1.62826800  |
| N  | -7.63526500  | 0.25754500  | 0.29580100  |
| C  | -8.45144100  | 1.41511400  | 0.18355400  |
| C  | -8.24883600  | -1.02341900 | 0.39587600  |
| C  | -8.14484800  | 2.57589500  | 0.91494000  |
| C  | -9.59279400  | 1.40798600  | -0.63323700 |
| C  | -7.77913900  | -2.10058000 | -0.37232800 |
| C  | -9.34926400  | -1.21837700 | 1.24648300  |
| C  | -8.95363300  | 3.70339800  | 0.81961500  |
| H  | -7.27672200  | 2.57963400  | 1.56725500  |
| C  | -10.39865800 | 2.54046800  | -0.73195000 |
| H  | -9.85324600  | 0.50613100  | -1.17895200 |
| C  | -8.37389100  | -3.35483400 | -0.26424400 |
| H  | -6.94410400  | -1.95243400 | -1.05060200 |
| C  | -9.96710300  | -2.46270300 | 1.32314400  |
| H  | -9.72384500  | -0.38574300 | 1.83436300  |
| C  | -10.07776500 | 3.71231100  | -0.02362400 |
| H  | -8.73026800  | 4.59383000  | 1.40021700  |
| H  | -11.29472400 | 2.50661000  | -1.34548600 |
| C  | -9.46923700  | -3.55667800 | 0.59547000  |
| H  | -8.01292500  | -4.17234600 | -0.88224000 |
| H  | -10.82721800 | -2.61271100 | 1.96903900  |
| Co | -0.75515000  | -1.12011200 | -0.17396300 |
| C  | 6.83157500   | 0.66523000  | 0.10127100  |
| C  | 7.71460300   | 1.77340400  | 0.14667700  |
| C  | 7.35611500   | -0.64383800 | 0.08639600  |
| C  | 9.09054200   | 1.54522800  | 0.17391100  |
| O  | 7.13430300   | 3.00315400  | 0.15991000  |
| C  | 8.73103700   | -0.87005700 | 0.11541000  |
| H  | 6.65617200   | -1.46922200 | 0.05400000  |
| C  | 9.61388400   | 0.23911500  | 0.15887300  |
| H  | 9.79131500   | 2.36989600  | 0.20792000  |
| C  | 7.96421000   | 4.16783300  | 0.21114500  |
| O  | 9.31133200   | -2.09819200 | 0.10564400  |
| C  | 11.02414500  | 0.04026100  | 0.18832800  |
| H  | 8.58680800   | 4.13921600  | 1.11753100  |
| H  | 8.62978900   | 4.18688800  | -0.66449400 |

|    |              |             |             |
|----|--------------|-------------|-------------|
| C  | 7.04981700   | 5.38388500  | 0.22179200  |
| C  | 8.48056900   | -3.26287700 | 0.07274300  |
| C  | 12.22700700  | -0.10685500 | 0.21392700  |
| H  | 6.37806200   | 5.31085700  | 1.08733400  |
| H  | 6.41781700   | 5.35620200  | -0.67579300 |
| C  | 7.83570800   | 6.70046200  | 0.27331000  |
| H  | 7.81581000   | -3.26783000 | 0.94949700  |
| H  | 7.85658500   | -3.24650700 | -0.83349500 |
| C  | 9.39155200   | -4.48123900 | 0.07899800  |
| H  | 13.28456100  | -0.24872800 | 0.23679200  |
| H  | 8.51491800   | 6.75898000  | -0.59061000 |
| H  | 8.47509800   | 6.71388300  | 1.16887500  |
| C  | 6.92833800   | 7.93815500  | 0.28455000  |
| H  | 10.06482300  | -4.42164600 | -0.78605500 |
| H  | 10.02322800  | -4.44319900 | 0.97601400  |
| C  | 8.59959000   | -5.79483300 | 0.04436500  |
| H  | 6.24994700   | 7.88010200  | 1.14803700  |
| H  | 6.28945000   | 7.92501700  | -0.61039700 |
| C  | 7.71458200   | 9.25332400  | 0.33585100  |
| H  | 7.96155900   | -5.81831000 | -0.85223000 |
| H  | 7.91857300   | -5.83877800 | 0.90787500  |
| C  | 9.50128100   | -7.03670200 | 0.05191800  |
| H  | 8.37828800   | 9.35048200  | -0.53301300 |
| H  | 7.04404100   | 10.12079900 | 0.34295000  |
| H  | 8.33833300   | 9.30522200  | 1.23755100  |
| H  | 10.18178500  | -6.99345600 | -0.81067400 |
| H  | 10.13857200  | -7.01391000 | 0.94763000  |
| C  | 8.70881100   | -8.34869200 | 0.01728600  |
| H  | 8.08646300   | -8.41041800 | -0.88485300 |
| H  | 9.37532100   | -9.21933100 | 0.02365400  |
| H  | 8.04289000   | -8.43079500 | 0.88602700  |
| N  | -10.85910200 | 4.88755800  | -0.06465600 |
| N  | -10.13265100 | -4.79542900 | 0.72636900  |
| C  | -9.46079000  | -5.87838400 | 0.75071100  |
| H  | -9.99536900  | -6.82675900 | 0.81118800  |
| H  | -8.36255700  | -5.91729100 | 0.72672000  |
| C  | -11.38590300 | 5.27074400  | -1.15999100 |
| H  | -12.01712700 | 6.15976700  | -1.15673200 |
| H  | -11.23409600 | 4.76274700  | -2.12322100 |
| Cl | -2.09426300  | -2.92474100 | -0.17140800 |
| Cl | -0.53749800  | -1.17916000 | 2.10975600  |
| C  | -1.28413300  | -0.66113400 | -2.07271800 |
| C  | 0.40186400   | -2.38736900 | -1.19475800 |
| O  | -2.31144600  | -0.96085700 | -2.60703700 |
| O  | -0.33236800  | 0.11989900  | -2.64833200 |
| O  | 0.50053100   | -2.70377600 | -2.34762900 |
| O  | 1.18570400   | -2.87832100 | -0.20189800 |
| H  | -0.61232900  | 0.27804600  | -3.57305600 |
| H  | 1.71783900   | -3.60914500 | -0.58093900 |

-----  
Total electronic Energy ( $E_{\text{total}}$ ) = -3648.031980 (Hartree/Particle).

DFT-optimized geometry of **(4)**  $[\text{Co}^{\text{II}}(\eta^2\text{-COF-N,N})(\text{COOH})(\text{CO})\text{Cl}_2]$  (singlet) (**OC\*COOH**), computed at the B3LYP-D3/ LANL2DZ (Co)/ 6-31+G\* (HCNOCl) level in absence of any solvent.

| Atom | x           | y           | z           |
|------|-------------|-------------|-------------|
| C    | -5.41999200 | 0.83038800  | -0.07279600 |
| C    | -4.21541600 | 1.01049700  | -0.08180100 |
| C    | -2.82093500 | 1.24049900  | -0.09407600 |
| C    | -2.27613900 | 2.53690500  | -0.21387800 |
| C    | -1.91962400 | 0.15946200  | 0.01789800  |
| C    | -0.89774500 | 2.69808200  | -0.22788400 |
| H    | -2.94112100 | 3.39032300  | -0.29797800 |
| N    | -0.60065900 | 0.32577300  | 0.00799700  |
| H    | -2.28925600 | -0.85364600 | 0.11527900  |
| C    | -0.07385900 | 1.57323400  | -0.11882300 |
| H    | -0.45031700 | 3.68220700  | -0.32715600 |
| C    | 1.37027900  | 1.60536300  | -0.17332600 |
| N    | 1.99682600  | 0.47860300  | -0.11498800 |
| H    | 1.89905100  | 2.54854500  | -0.30663200 |
| C    | 3.40590200  | 0.43529600  | -0.14460500 |
| C    | 4.16166900  | 1.25022800  | 0.71094200  |
| C    | 4.04746300  | -0.44496300 | -1.02952300 |
| C    | 5.55024300  | 1.18586500  | 0.68520600  |
| H    | 3.65458900  | 1.86751000  | 1.44684600  |
| C    | 5.43264900  | -0.47774500 | -1.07882500 |
| H    | 3.44403100  | -1.06717000 | -1.68044100 |
| C    | 6.20575100  | 0.32184900  | -0.21245500 |
| H    | 6.13296200  | 1.78224600  | 1.37960700  |
| H    | 5.92904100  | -1.14108300 | -1.77930700 |
| N    | 7.61409000  | 0.23369500  | -0.22740900 |
| C    | 8.40778300  | 1.38327300  | 0.03012300  |
| C    | 8.24694900  | -1.02360100 | -0.43320400 |
| C    | 8.10394700  | 2.60999000  | -0.58581400 |
| C    | 9.52279800  | 1.30753300  | 0.87929100  |
| C    | 7.75592800  | -2.18105800 | 0.19247300  |
| C    | 9.38812700  | -1.11962700 | -1.24693800 |
| C    | 8.88916800  | 3.73278000  | -0.34688200 |
| H    | 7.25568300  | 2.66983300  | -1.26107700 |
| C    | 10.30486700 | 2.43496000  | 1.12224300  |
| H    | 9.78139800  | 0.35767200  | 1.33740000  |
| C    | 8.37071500  | -3.41204500 | -0.01998600 |
| H    | 6.88900100  | -2.11252800 | 0.84281300  |
| C    | 10.02417300 | -2.34401300 | -1.42589300 |
| H    | 9.77953700  | -0.22661100 | -1.72492900 |
| C    | 9.98587200  | 3.66974300  | 0.52951300  |
| H    | 8.66783100  | 4.67603500  | -0.83798700 |
| H    | 11.18114400 | 2.35008400  | 1.75902000  |
| C    | 9.50725700  | -3.51340000 | -0.84320700 |
| H    | 7.99203000  | -4.29316800 | 0.49076800  |
| H    | 10.91499400 | -2.41768400 | -2.04278900 |
| Co   | 0.78523700  | -1.06061800 | 0.14270500  |
| C    | -6.81905800 | 0.61434900  | -0.06414000 |
| C    | -7.71125700 | 1.71342400  | -0.13981600 |
| C    | -7.33189100 | -0.69703200 | 0.01839500  |
| C    | -9.08563500 | 1.47410300  | -0.12930400 |
| O    | -7.14109100 | 2.94512700  | -0.21832000 |
| C    | -8.70516600 | -0.93423300 | 0.02748800  |
| H    | -6.62484100 | -1.51522700 | 0.07260900  |
| C    | -9.59751300 | 0.16612000  | -0.04649100 |
| H    | -9.79368200 | 2.29132800  | -0.18506300 |
| C    | -7.98085600 | 4.10088600  | -0.30803300 |
| O    | -9.27530100 | -2.16425800 | 0.10309400  |

|    |              |             |             |
|----|--------------|-------------|-------------|
| C  | -11.00635000 | -0.04417100 | -0.03833200 |
| H  | -8.61940600  | 4.02556900  | -1.20045700 |
| H  | -8.63037700  | 4.15584100  | 0.57799900  |
| C  | -7.07618000  | 5.32128200  | -0.39200000 |
| C  | -8.43481300  | -3.32110900 | 0.17154800  |
| C  | -12.20818200 | -0.20122000 | -0.03268000 |
| H  | -6.41902300  | 5.21216300  | -1.26492400 |
| H  | -6.42858100  | 5.34055600  | 0.49462600  |
| C  | -7.87311700  | 6.62845800  | -0.49167500 |
| H  | -7.78805500  | -3.36110700 | -0.71755800 |
| H  | -7.79280500  | -3.25914200 | 1.06298700  |
| C  | -9.33641600  | -4.54447900 | 0.23931100  |
| H  | -13.26476000 | -0.35207600 | -0.02758600 |
| H  | -8.53781900  | 6.72298100  | 0.38029100  |
| H  | -8.52782000  | 6.59507300  | -1.37556600 |
| C  | -6.97566400  | 7.87049300  | -0.57708800 |
| H  | -9.99280200  | -4.44979600 | 1.11418500  |
| H  | -9.98608900  | -4.55188400 | -0.64556200 |
| C  | -8.53372800  | -5.84967700 | 0.31801400  |
| H  | -6.31161700  | 7.77631500  | -1.44849500 |
| H  | -6.32162600  | 7.90425200  | 0.30628200  |
| C  | -7.77291500  | 9.17620200  | -0.67690200 |
| H  | -7.87772100  | -5.82762100 | 1.20148900  |
| H  | -7.86956700  | -5.92861500 | -0.55597000 |
| C  | -9.42604600  | -7.09649300 | 0.38553400  |
| H  | -8.42242700  | 9.30989900  | 0.19780800  |
| H  | -7.10931900  | 10.04695000 | -0.73670600 |
| H  | -8.41229300  | 9.18091400  | -1.56908300 |
| H  | -10.08985900 | -7.01808200 | 1.25863200  |
| H  | -10.08095500 | -7.11932700 | -0.49740100 |
| C  | -8.62306300  | -8.40014200 | 0.46468700  |
| H  | -7.98255500  | -8.41585800 | 1.35599700  |
| H  | -9.28296700  | -9.27457300 | 0.51174500  |
| H  | -7.97364700  | -8.51773600 | -0.41238700 |
| N  | 10.74390900  | 4.84573900  | 0.71940200  |
| N  | 10.19201600  | -4.72571500 | -1.07402500 |
| C  | 9.53739400   | -5.80747900 | -1.23582000 |
| H  | 10.08761600  | -6.73893300 | -1.37193700 |
| H  | 8.43969300   | -5.86044900 | -1.25971700 |
| C  | 11.22890300  | 5.11906900  | 1.86581900  |
| H  | 11.84330400  | 6.01295400  | 1.97689000  |
| H  | 11.05616000  | 4.51013900  | 2.76484500  |
| Cl | 2.38784600   | -2.62816500 | 0.55512000  |
| Cl | 0.65319700   | -1.35789400 | -2.20032500 |
| C  | 0.77323500   | -0.73517800 | 2.05956600  |
| O  | 1.36706100   | 0.13900600  | 2.65009100  |
| O  | -0.06732600  | -1.58877000 | 2.71597000  |
| H  | -0.01177400  | -1.38347000 | 3.67268800  |
| C  | -0.28955300  | -2.55540200 | 0.20600200  |
| O  | -0.94548600  | -3.48537700 | 0.18583800  |

---

Total electronic Energy ( $E_{\text{total}}$ ) = -3572.259619 (Hartree/Particle).

DFT-optimized geometry of **(4a)** [ $\text{Co}^{\text{II}}(\eta^2\text{-COF-N,N})(\text{COOH})\text{Cl}_2$ ] (singlet) (\*COOH), computed at the B3LYP-D3/ LANL2DZ (Co)/ 6-31+G\* (HCNOCl) level in absence of any solvent.

| Atom | x            | y           | z           |
|------|--------------|-------------|-------------|
| C    | 5.35523200   | 0.85696400  | -0.02060700 |
| C    | 4.15348600   | 1.03299600  | -0.11079100 |
| C    | 2.76178300   | 1.26014400  | -0.21147300 |
| C    | 2.21343500   | 2.55984300  | -0.21775800 |
| C    | 1.86531900   | 0.17316100  | -0.30785600 |
| C    | 0.83592300   | 2.71829700  | -0.28503500 |
| H    | 2.87314500   | 3.41929900  | -0.15387300 |
| N    | 0.54889900   | 0.33597700  | -0.40367300 |
| H    | 2.22885600   | -0.84660500 | -0.29168800 |
| C    | 0.01469800   | 1.58694600  | -0.36324900 |
| H    | 0.38640600   | 3.70652300  | -0.26387500 |
| C    | -1.43469100  | 1.64415100  | -0.31358800 |
| N    | -2.08879700  | 0.52994000  | -0.28657600 |
| H    | -1.92278900  | 2.61660900  | -0.21605200 |
| C    | -3.48541700  | 0.49206900  | -0.16901800 |
| C    | -4.32929000  | 1.42542500  | -0.79757000 |
| C    | -4.04978000  | -0.53523200 | 0.60795400  |
| C    | -5.70731600  | 1.33307100  | -0.65551700 |
| H    | -3.90922600  | 2.18122700  | -1.45639500 |
| C    | -5.42337000  | -0.60236900 | 0.78185800  |
| H    | -3.38910600  | -1.24905600 | 1.08653500  |
| C    | -6.27718200  | 0.31870900  | 0.14190300  |
| H    | -6.35391800  | 2.02731900  | -1.18216300 |
| H    | -5.84796600  | -1.38473400 | 1.40188400  |
| N    | -7.67541400  | 0.20925300  | 0.27085300  |
| C    | -8.49287100  | 1.37187400  | 0.26518600  |
| C    | -8.28806300  | -1.07268900 | 0.36221600  |
| C    | -8.13792700  | 2.49579200  | 1.03123700  |
| C    | -9.68208400  | 1.40413100  | -0.47929100 |
| C    | -7.87779900  | -2.12053000 | -0.47728000 |
| C    | -9.33051900  | -1.29722200 | 1.27629100  |
| C    | -8.94738100  | 3.62683600  | 1.04012800  |
| H    | -7.23122600  | 2.46777000  | 1.62812200  |
| C    | -10.48877400 | 2.54031600  | -0.47399600 |
| H    | -9.97819500  | 0.52947500  | -1.05055200 |
| C    | -8.47210700  | -3.37577700 | -0.37922400 |
| H    | -7.08907000  | -1.94845500 | -1.20357900 |
| C    | -9.94966200  | -2.54133400 | 1.34536200  |
| H    | -9.65999000  | -0.48718600 | 1.92006000  |
| C    | -10.12099800 | 3.67654400  | 0.26879800  |
| H    | -8.68591600  | 4.48826600  | 1.64792000  |
| H    | -11.42083300 | 2.53669900  | -1.03233300 |
| C    | -9.50877200  | -3.60750400 | 0.54347900  |
| H    | -8.15889300  | -4.16950400 | -1.05185900 |
| H    | -10.76573400 | -2.71349500 | 2.04096000  |
| C    | 6.75067900   | 0.64214900  | 0.08652100  |
| C    | 7.64020500   | 1.74362300  | 0.15749100  |
| C    | 7.26283700   | -0.67132200 | 0.12472700  |
| C    | 9.01052700   | 1.50469700  | 0.26243500  |
| O    | 7.07134500   | 2.97829000  | 0.11628100  |
| C    | 8.63220900   | -0.90828600 | 0.23093700  |
| H    | 6.55782200   | -1.49128900 | 0.07099600  |
| C    | 9.52176100   | 0.19419200  | 0.30025300  |
| H    | 9.71617100   | 2.32405100  | 0.31775200  |
| C    | 7.90825200   | 4.13662000  | 0.18962800  |
| O    | 9.20061100   | -2.14112400 | 0.27489300  |
| C    | 10.92660900  | -0.01561900 | 0.40825300  |

|    |              |             |             |
|----|--------------|-------------|-------------|
| H  | 8.48168900   | 4.12025200  | 1.12821600  |
| H  | 8.61948300   | 4.13332200  | -0.64955800 |
| C  | 7.00616000   | 5.36038900  | 0.12898100  |
| C  | 8.36213400   | -3.29934500 | 0.21281600  |
| C  | 12.12502800  | -0.17219600 | 0.50046300  |
| H  | 6.28775100   | 5.30859900  | 0.95784400  |
| H  | 6.42356600   | 5.32194100  | -0.80103000 |
| C  | 7.80042900   | 6.67099200  | 0.20033700  |
| H  | 7.65059000   | -3.28641900 | 1.05185100  |
| H  | 7.78858100   | -3.29049200 | -0.72618400 |
| C  | 9.26050200   | -4.52490700 | 0.28514800  |
| H  | 13.17851100  | -0.32244800 | 0.58199100  |
| H  | 8.52543300   | 6.70879000  | -0.62671900 |
| H  | 8.39105300   | 6.69457300  | 1.12860500  |
| C  | 6.90538400   | 7.91631600  | 0.14200100  |
| H  | 9.98124200   | -4.48201700 | -0.54184100 |
| H  | 9.84181700   | -4.48041500 | 1.21533200  |
| C  | 8.46004000   | -5.83231800 | 0.22288700  |
| H  | 6.18111200   | 7.87881000  | 0.96859200  |
| H  | 6.31536300   | 7.89321800  | -0.78567700 |
| C  | 7.69999600   | 9.22549600  | 0.21363000  |
| H  | 7.87247500   | -5.86196900 | -0.70735800 |
| H  | 7.73168900   | -5.85967900 | 1.04748600  |
| C  | 9.34900700   | -7.08122300 | 0.29563800  |
| H  | 8.41025800   | 9.30212600  | -0.61974600 |
| H  | 7.03819700   | 10.09861300 | 0.17013400  |
| H  | 8.27492900   | 9.28757100  | 1.14660800  |
| H  | 10.07708400  | -7.05413400 | -0.52792000 |
| H  | 9.93540600   | -7.05261200 | 1.22532300  |
| C  | 8.54824600   | -8.38710300 | 0.23217000  |
| H  | 7.97696000   | -8.45488100 | -0.70272400 |
| H  | 9.20566700   | -9.26300400 | 0.28637400  |
| H  | 7.83379900   | -8.45293800 | 1.06288500  |
| N  | -10.89996200 | 4.85228800  | 0.33215500  |
| N  | -10.17025800 | -4.84772400 | 0.66925700  |
| C  | -9.50586300  | -5.93368000 | 0.60572200  |
| H  | -10.04180500 | -6.88139700 | 0.66418900  |
| H  | -8.41192400  | -5.97634400 | 0.50705200  |
| C  | -11.48774200 | 5.28993000  | -0.71044900 |
| H  | -12.11525400 | 6.17759300  | -0.62636400 |
| H  | -11.39269500 | 4.83090700  | -1.70501600 |
| Co | -0.76533500  | -1.10639600 | -0.62734800 |
| Cl | -2.34138400  | -2.54068400 | -1.24581600 |
| Cl | -0.48772200  | -1.73096800 | 1.47313000  |
| C  | 0.42336300   | -2.23281600 | -1.48216700 |
| O  | 0.59071800   | -1.80336100 | -2.61244900 |
| O  | 1.01908800   | -3.32222400 | -0.98811300 |
| H  | 1.51911900   | -3.74566300 | -1.71663700 |

---

Total electronic Energy ( $E_{\text{total}}$ ) = -3458.901227 (Hartree/Particle).

DFT-optimized geometry of **(5)**  $[\text{Co}^{\text{II}}(\eta^2\text{-COF-N,N}')(\text{CO})_2\text{Cl}_2]$  (doublet) ( $\text{OC}^*\text{CO}$ ), computed at the UB3LYP-D3/ LANL2DZ (Co)/ 6-31+G\* (HCNOCl) level in absence of any solvent.

---



| Atom | x            | y           | z           |
|------|--------------|-------------|-------------|
| C    | -5.51201200  | 0.83225200  | 0.00935600  |
| C    | -4.30200600  | 0.97410700  | 0.00485300  |
| C    | -2.90062600  | 1.15845400  | -0.00626900 |
| C    | -2.31504600  | 2.43802500  | -0.11168500 |
| C    | -2.02284400  | 0.05095700  | 0.08992000  |
| C    | -0.93115200  | 2.55635800  | -0.12532100 |
| H    | -2.95248400  | 3.31327800  | -0.18769300 |
| N    | -0.70414100  | 0.17180500  | 0.08643000  |
| H    | -2.42128700  | -0.95720600 | 0.16669300  |
| C    | -0.14541200  | 1.39880500  | -0.02672700 |
| H    | -0.45692100  | 3.52934500  | -0.21840400 |
| C    | 1.30675100   | 1.43454000  | -0.08690700 |
| N    | 1.99715300   | 0.34107900  | -0.06574500 |
| H    | 1.80034000   | 2.40002300  | -0.20837600 |
| C    | 3.40738300   | 0.37597100  | -0.10549500 |
| C    | 4.13848700   | 1.29232100  | 0.66950500  |
| C    | 4.08838400   | -0.54477000 | -0.91819600 |
| C    | 5.52744200   | 1.28124700  | 0.64541800  |
| H    | 3.61893900   | 1.96442400  | 1.34810300  |
| C    | 5.47278900   | -0.52610800 | -0.97252800 |
| H    | 3.51727400   | -1.24546300 | -1.51378900 |
| C    | 6.21711700   | 0.36675400  | -0.17620600 |
| H    | 6.08559600   | 1.95575400  | 1.28628700  |
| H    | 5.99052900   | -1.23058700 | -1.61442000 |
| N    | 7.62476900   | 0.31641000  | -0.17295100 |
| C    | 8.38675300   | 1.49911300  | 0.02504000  |
| C    | 8.29342700   | -0.93559800 | -0.29127400 |
| C    | 8.06756000   | 2.67556000  | -0.67513200 |
| C    | 9.48589600   | 1.50445700  | 0.89778700  |
| C    | 7.82357700   | -2.06411700 | 0.39962000  |
| C    | 9.44710200   | -1.05025300 | -1.08410300 |
| C    | 8.82202800   | 3.83006300  | -0.49502100 |
| H    | 7.23300400   | 2.67048800  | -1.36992100 |
| C    | 10.23705100  | 2.66364800  | 1.08153200  |
| H    | 9.75707200   | 0.59207500  | 1.42025100  |
| C    | 8.47275400   | -3.28889900 | 0.27074100  |
| H    | 6.94293400   | -1.98286000 | 1.02966000  |
| C    | 10.11719000  | -2.26599600 | -1.17914600 |
| H    | 9.82111200   | -0.17845600 | -1.61258500 |
| C    | 9.90189400   | 3.84970800  | 0.40405100  |
| H    | 8.58993500   | 4.73387600  | -1.05101600 |
| H    | 11.10250000  | 2.64093300  | 1.73803900  |
| C    | 9.62245200   | -3.41020900 | -0.53104900 |
| H    | 8.10696500   | -4.14707800 | 0.82759800  |
| H    | 11.01761900  | -2.35395300 | -1.77999600 |
| Co   | 0.93088000   | -1.38551600 | 0.06794400  |
| C    | -6.91803800  | 0.66532600  | 0.01320700  |
| C    | -7.77108300  | 1.79611500  | -0.04798000 |
| C    | -7.47802800  | -0.62772100 | 0.07612400  |
| C    | -9.15306800  | 1.60575300  | -0.04303200 |
| O    | -7.15785200  | 3.00826000  | -0.10780800 |
| C    | -8.85896300  | -0.81609700 | 0.07962400  |
| H    | -6.80078700  | -1.47136600 | 0.11970400  |
| C    | -9.71164200  | 0.31583100  | 0.02005200  |
| H    | -9.83145600  | 2.44839600  | -0.08813700 |
| C    | -7.95642300  | 4.19359400  | -0.18203500 |
| O    | -9.47261400  | -2.02640100 | 0.13655000  |
| C    | -11.12712100 | 0.15583800  | 0.02282700  |

|    |              |             |             |
|----|--------------|-------------|-------------|
| H  | -8.59564200  | 4.15371100  | -1.07632300 |
| H  | -8.60545400  | 4.25875800  | 0.70372800  |
| C  | -7.00953000  | 5.38276700  | -0.24710500 |
| C  | -8.67422200  | -3.21303500 | 0.18892700  |
| C  | -12.33383900 | 0.04181700  | 0.02411900  |
| H  | -6.35488900  | 5.26327900  | -1.12055300 |
| H  | -6.36326800  | 5.36650300  | 0.64055400  |
| C  | -7.76006400  | 6.71831800  | -0.32891900 |
| H  | -8.02748000  | -3.26310100 | -0.69976800 |
| H  | -8.03202000  | -3.18747400 | 1.08209300  |
| C  | -9.61901000  | -4.40439900 | 0.23712900  |
| H  | -13.39514200 | -0.07108300 | 0.02533600  |
| H  | -8.42273300  | 6.82345800  | 0.54338900  |
| H  | -8.41388300  | 6.72064600  | -1.21409700 |
| C  | -6.81964600  | 7.92935100  | -0.39507800 |
| H  | -10.27313200 | -4.29946400 | 1.11251800  |
| H  | -10.26701300 | -4.37516100 | -0.64850800 |
| C  | -8.86378000  | -5.73856900 | 0.29699400  |
| H  | -6.15763600  | 7.82461700  | -1.26683300 |
| H  | -6.16647300  | 7.92745100  | 0.48959000  |
| C  | -7.57059800  | 9.26345200  | -0.47701800 |
| H  | -8.20893400  | -5.75341000 | 1.18152100  |
| H  | -8.20140100  | -5.82808000 | -0.57737000 |
| C  | -9.80018300  | -6.95357500 | 0.34456600  |
| H  | -8.21683400  | 9.40701400  | 0.39856000  |
| H  | -6.87691400  | 10.11129700 | -0.52311400 |
| H  | -8.20763400  | 9.30346500  | -1.36998700 |
| H  | -10.46218600 | -6.86468900 | 1.21801600  |
| H  | -10.45404700 | -6.93954500 | -0.53931800 |
| C  | -9.04451200  | -8.28619400 | 0.40473300  |
| H  | -8.40657600  | -8.33849300 | 1.29650000  |
| H  | -9.73535200  | -9.13704900 | 0.43760000  |
| H  | -8.39821000  | -8.41362800 | -0.47328300 |
| N  | 10.62959300  | 5.05297700  | 0.53072400  |
| N  | 10.33989900  | -4.61668100 | -0.67894900 |
| C  | 9.71258700   | -5.72109700 | -0.78758100 |
| H  | 10.28618100  | -6.64558000 | -0.86001800 |
| H  | 8.61706300   | -5.80105800 | -0.82586500 |
| C  | 11.08548600  | 5.41155800  | 1.66549400  |
| H  | 11.67766500  | 6.32485100  | 1.72908700  |
| H  | 10.90857500  | 4.85840200  | 2.59911200  |
| Cl | 2.81596600   | -3.03451500 | 0.61955600  |
| Cl | 0.81126400   | -1.46861200 | -2.20321600 |
| C  | 1.11029000   | -1.37605500 | 1.90892100  |
| C  | -0.08703800  | -2.94323700 | -0.00889700 |
| O  | -0.68155100  | -3.91089000 | -0.10157400 |
| O  | 1.22124600   | -1.31860700 | 3.04402900  |

---

Total electronic Energy ( $E_{\text{total}}$ ) = -3496.426386 (Hartree/Particle).

DFT-optimized geometry of **(6)**  $[\text{Co}^{\text{II}}(\eta^2\text{-COF-N,N}')(\text{CHO})(\text{CO})\text{Cl}_2]$  (singlet) ( $\text{OC}^*\text{CHO}$ ), computed at the B3LYP-D3/ LANL2DZ (Co)/ 6-31+G\* (HCNOCl) level in absence of any solvent.

---

| Atom | x | y | z |
|------|---|---|---|
|------|---|---|---|

|    |              |             |             |
|----|--------------|-------------|-------------|
| C  | -5.39710400  | 0.82871900  | -0.03163200 |
| C  | -4.19279400  | 1.01126400  | -0.04123300 |
| C  | -2.79852200  | 1.23823900  | -0.05758700 |
| C  | -2.25146200  | 2.53445600  | -0.16240700 |
| C  | -1.90016600  | 0.15125200  | 0.03358500  |
| C  | -0.87243600  | 2.69177600  | -0.16758700 |
| H  | -2.91398500  | 3.39068200  | -0.23603600 |
| N  | -0.58154700  | 0.31136300  | 0.02098300  |
| H  | -2.27614000  | -0.86011800 | 0.11965100  |
| C  | -0.05364300  | 1.56194600  | -0.07126800 |
| H  | -0.42156800  | 3.67630600  | -0.24670300 |
| C  | 1.38979800   | 1.59181900  | -0.08843200 |
| N  | 2.01454000   | 0.46027700  | -0.01296700 |
| H  | 1.92419200   | 2.53236700  | -0.21915600 |
| C  | 3.42651900   | 0.41982600  | -0.03405300 |
| C  | 4.18431400   | 1.25002100  | 0.80596200  |
| C  | 4.07299300   | -0.46352400 | -0.91352800 |
| C  | 5.57347300   | 1.18971400  | 0.78265900  |
| H  | 3.68280400   | 1.89821700  | 1.52044100  |
| C  | 5.45797300   | -0.49232900 | -0.96256400 |
| H  | 3.47202400   | -1.08391600 | -1.56814200 |
| C  | 6.23201600   | 0.31639100  | -0.10458900 |
| H  | 6.15341500   | 1.80132500  | 1.46584800  |
| H  | 5.95398600   | -1.15773800 | -1.66118800 |
| N  | 7.63850600   | 0.23376200  | -0.12146400 |
| C  | 8.43063600   | 1.38269600  | 0.14925300  |
| C  | 8.27966300   | -1.01636100 | -0.35108300 |
| C  | 8.13419500   | 2.61217700  | -0.46418000 |
| C  | 9.53812300   | 1.30009900  | 1.00698100  |
| C  | 7.80791600   | -2.18535100 | 0.26702500  |
| C  | 9.41141000   | -1.09070700 | -1.17963600 |
| C  | 8.91949400   | 3.73246800  | -0.21355100 |
| H  | 7.29261700   | 2.67615300  | -1.14748800 |
| C  | 10.32060500  | 2.42481400  | 1.26158200  |
| H  | 9.79131900   | 0.34700100  | 1.46149000  |
| C  | 8.43186700   | -3.40778400 | 0.03227600  |
| H  | 6.94828800   | -2.13319700 | 0.92850600  |
| C  | 10.05727400  | -2.30644500 | -1.38114800 |
| H  | 9.78796900   | -0.18801200 | -1.65134700 |
| C  | 10.00864100  | 3.66279700  | 0.67180200  |
| H  | 8.70491200   | 4.67816200  | -0.70290000 |
| H  | 11.19193800  | 2.33547700  | 1.90445300  |
| C  | 9.55894300   | -3.48759700 | -0.80604600 |
| H  | 8.06818100   | -4.29905100 | 0.53621400  |
| H  | 10.94121500  | -2.36388700 | -2.00949200 |
| Co | 0.78873000   | -1.09329900 | 0.10868000  |
| C  | -6.79480000  | 0.60637500  | -0.01773500 |
| C  | -7.69342200  | 1.69961100  | -0.10300700 |
| C  | -7.30001200  | -0.70693400 | 0.08087400  |
| C  | -9.06636100  | 1.45261700  | -0.08689800 |
| O  | -7.13058800  | 2.93364500  | -0.19578400 |
| C  | -8.67179300  | -0.95176100 | 0.09664400  |
| H  | -6.58802200  | -1.52018600 | 0.14364400  |
| C  | -9.57051300  | 0.14271300  | 0.01182300  |
| H  | -9.77924800  | 2.26506700  | -0.15016500 |
| C  | -7.97731500  | 4.08362800  | -0.29218800 |
| O  | -9.23469800  | -2.18387400 | 0.18874100  |
| C  | -10.97807900 | -0.07542200 | 0.02564800  |
| H  | -8.61742600  | 3.99792700  | -1.18258000 |

|    |              |             |             |
|----|--------------|-------------|-------------|
| H  | -8.62517900  | 4.14143500  | 0.59487700  |
| C  | -7.08009400  | 5.30871700  | -0.38724000 |
| C  | -8.38706100  | -3.33457800 | 0.27443900  |
| C  | -12.17898600 | -0.23926000 | 0.03583000  |
| H  | -6.42341000  | 5.19647700  | -1.26011800 |
| H  | -6.43150300  | 5.33898000  | 0.49834800  |
| C  | -7.88507700  | 6.61018100  | -0.49638900 |
| H  | -7.74143600  | -3.38484500 | -0.61495600 |
| H  | -7.74424300  | -3.25441700 | 1.16373500  |
| C  | -9.28119300  | -4.56206700 | 0.36305600  |
| H  | -13.23462800 | -0.39625500 | 0.04536900  |
| H  | -8.54951900  | 6.70753800  | 0.37546700  |
| H  | -8.54041000  | 6.56583900  | -1.37933400 |
| C  | -6.99537300  | 7.85698900  | -0.59248700 |
| H  | -9.93639700  | -4.45766300 | 1.23771200  |
| H  | -9.93252500  | -4.58730100 | -0.52029300 |
| C  | -8.47035900  | -5.86095500 | 0.46061600  |
| H  | -6.33153200  | 7.75998500  | -1.46374400 |
| H  | -6.34077900  | 7.90174700  | 0.28999500  |
| C  | -7.80071700  | 9.15696500  | -0.70185600 |
| H  | -7.81240300  | -5.82075600 | 1.34194600  |
| H  | -7.80781800  | -5.94980100 | -0.41364500 |
| C  | -9.35488500  | -7.11191200 | 0.55025000  |
| H  | -8.45025800  | 9.29356700  | 0.17238700  |
| H  | -7.14257900  | 10.03131800 | -0.76920700 |
| H  | -8.44094600  | 9.15066000  | -1.59341900 |
| H  | -10.01691200 | -7.02366500 | 1.42376800  |
| H  | -10.01191400 | -7.15279600 | -0.33048300 |
| C  | -8.54373400  | -8.40923700 | 0.64802900  |
| H  | -7.90078700  | -8.40674600 | 1.53769900  |
| H  | -9.19814000  | -9.28682800 | 0.71084400  |
| H  | -7.89589000  | -8.53684700 | -0.22881600 |
| N  | 10.76850300  | 4.83565000  | 0.87259400  |
| N  | 10.25244600  | -4.69043300 | -1.05853400 |
| C  | 9.60526800   | -5.77431700 | -1.23479900 |
| H  | 10.16177100  | -6.69936100 | -1.38777100 |
| H  | 8.50789900   | -5.83480200 | -1.25523800 |
| C  | 11.24036900  | 5.10535000  | 2.02524100  |
| H  | 11.85686800  | 5.99658200  | 2.14530100  |
| H  | 11.05423900  | 4.49548500  | 2.92097600  |
| Cl | 2.36714900   | -2.71139400 | 0.50385900  |
| Cl | 0.73339800   | -1.23700000 | -2.28205400 |
| C  | -0.30723500  | -2.55976200 | 0.07377800  |
| O  | -0.98435700  | -3.47414500 | 0.02144000  |
| C  | 0.73446400   | -0.94427100 | 2.03973800  |
| H  | 1.73457100   | -0.74551100 | 2.48652200  |
| O  | -0.25681400  | -1.03880600 | 2.71483800  |

---

Total electronic Energy ( $E_{\text{total}}$ ) = -3497.008852 (Hartree/Particle).

DFT-optimized geometry of **(6a)**  $[\text{Co}^{\text{II}}(\eta^2\text{-COF-N,N}')(\text{H}_2\text{O})(\text{CO})\text{Cl}_2]$  (doublet) ( $\text{OC}^*\text{OH}_2$ ), computed at the UB3LYP-D3/ LANL2DZ (Co)/ 6-31+G\* (HCNOCl) level in absence of any solvent.

---

| Atom | x | y | z |
|------|---|---|---|
|------|---|---|---|

|    |              |             |             |
|----|--------------|-------------|-------------|
| C  | -5.43055300  | 0.80849100  | 0.01354500  |
| C  | -4.22552100  | 0.98255000  | 0.04995700  |
| C  | -2.82948200  | 1.20357100  | 0.08899800  |
| C  | -2.27370600  | 2.49855900  | 0.02371000  |
| C  | -1.93406700  | 0.11444400  | 0.19469100  |
| C  | -0.89348500  | 2.64861400  | 0.04714700  |
| H  | -2.92984300  | 3.35934600  | -0.05639100 |
| N  | -0.61567600  | 0.26579300  | 0.23816300  |
| H  | -2.31313800  | -0.90074400 | 0.23436900  |
| C  | -0.08178500  | 1.51268600  | 0.15175100  |
| H  | -0.43834100  | 3.63204800  | -0.02301100 |
| C  | 1.36387200   | 1.54922300  | 0.10065800  |
| N  | 2.01084000   | 0.42877200  | 0.14197500  |
| H  | 1.87768000   | 2.49989000  | -0.04312300 |
| C  | 3.41803200   | 0.39818500  | 0.05573900  |
| C  | 4.21701200   | 1.32618500  | 0.74253500  |
| C  | 4.02345000   | -0.59791400 | -0.72789200 |
| C  | 5.60221300   | 1.26212700  | 0.64872800  |
| H  | 3.75546400   | 2.05283100  | 1.40618200  |
| C  | 5.40346400   | -0.63622000 | -0.84965900 |
| H  | 3.39107600   | -1.30471100 | -1.25365900 |
| C  | 6.21676800   | 0.28065700  | -0.15339000 |
| H  | 6.21631900   | 1.95316400  | 1.21690500  |
| H  | 5.86478000   | -1.39331400 | -1.47490000 |
| N  | 7.62198900   | 0.19643300  | -0.23446400 |
| C  | 8.41592300   | 1.37357900  | -0.18450800 |
| C  | 8.25795100   | -1.07419800 | -0.31184100 |
| C  | 8.06416900   | 2.50187600  | -0.94586200 |
| C  | 9.57828500   | 1.41923500  | 0.60089500  |
| C  | 7.82080800   | -2.14105600 | 0.48970800  |
| C  | 9.34919900   | -1.27070800 | -1.17433900 |
| C  | 8.84987100   | 3.64898500  | -0.91074800 |
| H  | 7.17894900   | 2.46462400  | -1.57365800 |
| C  | 10.36098100  | 2.57146000  | 0.63947900  |
| H  | 9.87323100   | 0.54240900  | 1.16941000  |
| C  | 8.43787800   | -3.38616100 | 0.40371000  |
| H  | 6.99269200   | -1.99234000 | 1.17620300  |
| C  | 9.98964100   | -2.50460500 | -1.22925300 |
| H  | 9.69875500   | -0.44695800 | -1.78942800 |
| C  | 9.99539600   | 3.71110200  | -0.09910300 |
| H  | 8.59130400   | 4.51395500  | -1.51476900 |
| H  | 11.27342800  | 2.57798800  | 1.22935000  |
| C  | 9.52419700   | -3.58925600 | -0.46702200 |
| H  | 8.10151400   | -4.19460700 | 1.04705600  |
| H  | 10.84243200  | -2.65453100 | -1.88483000 |
| Co | 0.84281800   | -1.14286400 | 0.39779200  |
| C  | -6.83021400  | 0.59854500  | -0.03353200 |
| C  | -7.71700000  | 1.70326000  | -0.08686100 |
| C  | -7.34952800  | -0.71274300 | -0.03063600 |
| C  | -9.09152000  | 1.46959100  | -0.13304500 |
| O  | -7.14153600  | 2.93544300  | -0.08835900 |
| C  | -8.72308400  | -0.94449000 | -0.07910600 |
| H  | -6.64685300  | -1.53564200 | 0.00680700  |
| C  | -9.60975600  | 0.16133400  | -0.12981000 |
| H  | -9.79510300  | 2.29159000  | -0.17329300 |
| C  | -7.97498700  | 4.09660600  | -0.15834400 |
| O  | -9.29822500  | -2.17492600 | -0.08222300 |
| C  | -11.01871800 | -0.04297500 | -0.17856300 |
| H  | -8.58265000  | 4.06126800  | -1.07456900 |

|    |              |             |             |
|----|--------------|-------------|-------------|
| H  | -8.65486500  | 4.11711300  | 0.70623600  |
| C  | -7.06536900  | 5.31627600  | -0.15993900 |
| C  | -8.46295000  | -3.33664700 | -0.04677900 |
| C  | -12.22055400 | -0.19480200 | -0.22036700 |
| H  | -6.37877000  | 5.24129700  | -1.01356600 |
| H  | -6.44847600  | 5.29606900  | 0.74829900  |
| C  | -7.85552600  | 6.62933200  | -0.23203400 |
| H  | -7.78781300  | -3.33336000 | -0.91544600 |
| H  | -7.84976200  | -3.32343000 | 0.86682100  |
| C  | -9.36884500  | -4.55854200 | -0.07119700 |
| H  | -13.27709600 | -0.34103600 | -0.25785600 |
| H  | -8.54934100  | 6.69002200  | 0.62006700  |
| H  | -8.47989400  | 6.63503300  | -1.13821900 |
| C  | -6.95303200  | 7.87063400  | -0.23534900 |
| H  | -10.05323000 | -4.50636900 | 0.78562900  |
| H  | -9.98938100  | -4.51804000 | -0.97585900 |
| C  | -8.57202700  | -5.86913900 | -0.03376800 |
| H  | -6.25988400  | 7.81019400  | -1.08685200 |
| H  | -6.32933600  | 7.86547300  | 0.67032600  |
| C  | -7.74355500  | 9.18222800  | -0.30796100 |
| H  | -7.94495500  | -5.89490400 | 0.87042200  |
| H  | -7.88002500  | -5.90573200 | -0.88872200 |
| C  | -9.46871200  | -7.11438600 | -0.05910400 |
| H  | -8.42235400  | 9.28188300  | 0.54888800  |
| H  | -7.07646200  | 10.05238300 | -0.30893700 |
| H  | -8.35206000  | 9.22615100  | -1.22044000 |
| H  | -10.16042100 | -7.07821500 | 0.79491800  |
| H  | -10.09461500 | -7.08953000 | -0.96277300 |
| C  | -8.67156300  | -8.42345700 | -0.02099900 |
| H  | -8.06047500  | -8.48730100 | 0.88865400  |
| H  | -9.33450800  | -9.29665300 | -0.04036500 |
| H  | -7.99413700  | -8.49838700 | -0.88140100 |
| N  | 10.75090600  | 4.90367900  | -0.11893300 |
| N  | 10.20932500  | -4.81815600 | -0.57741100 |
| C  | 9.55869300   | -5.91419700 | -0.56238700 |
| H  | 10.11079000  | -6.85334200 | -0.60789600 |
| H  | 8.46195900   | -5.97370000 | -0.51882900 |
| C  | 11.29851100  | 5.33516600  | 0.94786700  |
| H  | 11.90910600  | 6.23708400  | 0.89736800  |
| H  | 11.18437200  | 4.85706600  | 1.93140600  |
| Cl | 2.48481200   | -2.52806900 | 1.35651400  |
| Cl | 0.74671600   | -1.61480100 | -1.96861400 |
| C  | -0.21861000  | -2.62157800 | 0.55343800  |
| O  | -0.87204700  | -3.55605200 | 0.60950000  |
| O  | 0.86826300   | -0.33398200 | 2.77622900  |
| H  | 1.63197400   | -0.94562300 | 2.84492700  |
| H  | 0.16960700   | -0.75235000 | 3.30245300  |

---

Total electronic Energy ( $E_{\text{total}}$ ) = -3459.541642 (Hartree/Particle).

DFT-optimized geometry of **(6b)** [ $\text{Co}^{\text{II}}(\eta^2\text{-COF-N,N}')(\text{COCHO})\text{Cl}_2$ ] (singlet) (\*COCHO), computed at the B3LYP-D3/ LANL2DZ (Co)/ 6-31+G\* (HCNOCl) level in absence of any solvent.

---

| Atom | x | y | z |
|------|---|---|---|
|------|---|---|---|

|   |              |             |             |
|---|--------------|-------------|-------------|
| C | -5.37432000  | 0.88310100  | -0.01655600 |
| C | -4.17841900  | 1.09374300  | 0.07730600  |
| C | -2.78954200  | 1.33354300  | 0.18484400  |
| C | -2.24649600  | 2.63569300  | 0.20269000  |
| C | -1.88877800  | 0.24977300  | 0.28218100  |
| C | -0.86995200  | 2.80041900  | 0.27765500  |
| H | -2.90929200  | 3.49281700  | 0.13876300  |
| N | -0.57464600  | 0.42205700  | 0.39302100  |
| H | -2.24284800  | -0.77432700 | 0.25826100  |
| C | -0.04163800  | 1.67360500  | 0.35519300  |
| H | -0.42572000  | 3.79113400  | 0.25887100  |
| C | 1.40864900   | 1.74082100  | 0.29953800  |
| N | 2.06902300   | 0.63341900  | 0.22468700  |
| H | 1.88692500   | 2.72139100  | 0.23734500  |
| C | 3.46192600   | 0.58539300  | 0.10801300  |
| C | 4.32023100   | 1.51697000  | 0.72178800  |
| C | 4.01238300   | -0.46233400 | -0.65261800 |
| C | 5.69597400   | 1.40379400  | 0.57847100  |
| H | 3.91256600   | 2.28877700  | 1.36961200  |
| C | 5.38446700   | -0.55207200 | -0.82660300 |
| H | 3.34028900   | -1.17524100 | -1.11696000 |
| C | 6.25145900   | 0.36854900  | -0.20364600 |
| H | 6.35307800   | 2.09754300  | 1.09265400  |
| H | 5.79718900   | -1.35108100 | -1.43320100 |
| N | 7.64741000   | 0.23930500  | -0.33216800 |
| C | 8.48085500   | 1.39083300  | -0.33954400 |
| C | 8.24376900   | -1.05103100 | -0.41661300 |
| C | 8.14209400   | 2.51042800  | -1.11899400 |
| C | 9.67017200   | 1.41461600  | 0.40493800  |
| C | 7.82504400   | -2.08701500 | 0.43318300  |
| C | 9.27876600   | -1.29534200 | -1.33398100 |
| C | 8.96768400   | 3.62959700  | -1.14091200 |
| H | 7.23534700   | 2.48821700  | -1.71605600 |
| C | 10.49302900  | 2.53902000  | 0.38670700  |
| H | 9.95359000   | 0.54235900  | 0.98624600  |
| C | 8.40295800   | -3.35039100 | 0.34167900  |
| H | 7.04190300   | -1.89951700 | 1.16170000  |
| C | 9.88211800   | -2.54754000 | -1.39656600 |
| H | 9.61487300   | -0.49441900 | -1.98566400 |
| C | 10.14164700  | 3.67150100  | -0.36964500 |
| H | 8.71879100   | 4.48738800  | -1.75902100 |
| H | 11.42490400  | 2.52872300  | 0.94526600  |
| C | 9.43192600   | -3.60195500 | -0.58440500 |
| H | 8.08308000   | -4.13535900 | 1.02141900  |
| H | 10.69241100  | -2.73514500 | -2.09490500 |
| C | -6.75953000  | 0.61191400  | -0.12792400 |
| C | -7.69689900  | 1.67287600  | -0.19555200 |
| C | -7.21193900  | -0.72320500 | -0.17358900 |
| C | -9.05492400  | 1.37325200  | -0.30435700 |
| O | -7.18376800  | 2.93177300  | -0.14724500 |
| C | -8.56910400  | -1.02098700 | -0.28392100 |
| H | -6.47067300  | -1.51078700 | -0.12256200 |
| C | -9.50685600  | 0.04122800  | -0.34948100 |
| H | -9.79655800  | 2.16034400  | -0.35733500 |
| C | -8.07135700  | 4.05133400  | -0.22411800 |
| O | -9.08087900  | -2.27761200 | -0.33523600 |
| C | -10.90074300 | -0.23050400 | -0.46132300 |
| H | -8.63961400  | 4.00934400  | -1.16507300 |
| H | -8.78541200  | 4.01610400  | 0.61199600  |

|    |              |             |             |
|----|--------------|-------------|-------------|
| C  | -7.22575100  | 5.31461600  | -0.15972500 |
| C  | -8.18930000  | -3.39717700 | -0.28404100 |
| C  | -12.09083500 | -0.43996200 | -0.55664200 |
| H  | -6.50248900  | 5.29571800  | -0.98572400 |
| H  | -6.64552800  | 5.30229600  | 0.77249100  |
| C  | -8.07838600  | 6.58787300  | -0.23385300 |
| H  | -7.48013600  | -3.34342900 | -1.12322900 |
| H  | -7.61574900  | -3.37018400 | 0.65438500  |
| C  | -9.03014400  | -4.66210700 | -0.36704500 |
| H  | -13.13622900 | -0.63752500 | -0.64114600 |
| H  | -8.80774700  | 6.59229100  | 0.59024900  |
| H  | -8.66573600  | 6.58508900  | -1.16448700 |
| C  | -7.24115900  | 7.87257900  | -0.17147100 |
| H  | -9.75003400  | -4.66137100 | 0.46188000  |
| H  | -9.61529200  | -4.63526700 | -1.29555900 |
| C  | -8.16915400  | -5.93122400 | -0.32000400 |
| H  | -6.51264100  | 7.86852400  | -0.99515000 |
| H  | -6.65434600  | 7.87581900  | 0.75853600  |
| C  | -8.09419900  | 9.14431900  | -0.24577100 |
| H  | -7.57761200  | -5.94259400 | 0.60794200  |
| H  | -7.44279700  | -5.91609400 | -1.14650900 |
| C  | -8.99921000  | -7.21936700 | -0.40321400 |
| H  | -8.81050900  | 9.18812600  | 0.58481100  |
| H  | -7.47299400  | 10.04664000 | -0.19940300 |
| H  | -8.66770900  | 9.18064100  | -1.18097900 |
| H  | -9.72487300  | -7.23501600 | 0.42286900  |
| H  | -9.58972200  | -7.20860900 | -1.33075300 |
| C  | -8.13798400  | -8.48694000 | -0.35604600 |
| H  | -7.56027200  | -8.53719600 | 0.57593700  |
| H  | -8.75394300  | -9.39211300 | -0.41714600 |
| H  | -7.42434200  | -8.51050800 | -1.18965900 |
| N  | 10.93763000  | 4.83493500  | -0.44656000 |
| N  | 10.07675300  | -4.85150700 | -0.70382700 |
| C  | 9.39775300   | -5.92792600 | -0.63308600 |
| H  | 9.92062800   | -6.88318000 | -0.68696700 |
| H  | 8.30346900   | -5.95498500 | -0.53283400 |
| C  | 11.53001600  | 5.27717400  | 0.59145400  |
| H  | 12.17046700  | 6.15452200  | 0.49731100  |
| H  | 11.42666100  | 4.83215500  | 1.59155400  |
| Co | 0.74370000   | -1.00529300 | 0.61553400  |
| Cl | 2.28539400   | -2.57273800 | 1.14134000  |
| Cl | 0.45910600   | -1.61429500 | -1.49491700 |
| C  | -0.42506000  | -2.22166700 | 1.44875600  |
| O  | -1.28975800  | -3.01642100 | 1.18646000  |
| C  | -0.10294400  | -1.73924900 | 2.86858500  |
| H  | -0.41712900  | -2.27613200 | 3.78335100  |
| O  | 0.49470500   | -0.66702500 | 2.89999200  |

---

Total electronic Energy ( $E_{\text{total}}$ ) = -3496.976633 (Hartree/Particle).

DFT-optimized geometry of **(7)**  $[\text{Co}^{\text{II}}(\eta^2\text{-COF-N,N}')(\text{OCH}_2)(\text{CO})\text{Cl}_2]$  (doublet) ( $\text{OC}^*\text{OCH}_2$ ), computed at the UB3LYP-D3/ LANL2DZ (Co)/ 6-31+G\* (HCNOCl) level in absence of any solvent.

---

| Atom | x | y | z |
|------|---|---|---|
|------|---|---|---|



|    |              |             |             |
|----|--------------|-------------|-------------|
| C  | -5.43747800  | 0.81651800  | -0.03052400 |
| C  | -4.23295100  | 0.99414500  | 0.00240700  |
| C  | -2.83675300  | 1.21570400  | 0.03739900  |
| C  | -2.28242700  | 2.51104100  | -0.02415100 |
| C  | -1.94191100  | 0.12552000  | 0.13466700  |
| C  | -0.90229300  | 2.66109900  | 0.00032000  |
| H  | -2.93911900  | 3.37183000  | -0.09940900 |
| N  | -0.62363100  | 0.27651800  | 0.17474900  |
| H  | -2.32199100  | -0.88881900 | 0.17327000  |
| C  | -0.09134800  | 1.52466500  | 0.09867400  |
| H  | -0.44677400  | 3.64477800  | -0.06397400 |
| C  | 1.35451400   | 1.56090300  | 0.05943900  |
| N  | 1.99852200   | 0.43845100  | 0.10289200  |
| H  | 1.87077000   | 2.51127000  | -0.07882300 |
| C  | 3.40643200   | 0.40611300  | 0.01868400  |
| C  | 4.20708600   | 1.32491400  | 0.71520900  |
| C  | 4.01017600   | -0.57891200 | -0.77998400 |
| C  | 5.59280100   | 1.25944800  | 0.62171800  |
| H  | 3.74667100   | 2.04945500  | 1.38236300  |
| C  | 5.39048100   | -0.61699400 | -0.90256300 |
| H  | 3.37606300   | -1.27472500 | -1.31815700 |
| C  | 6.20540200   | 0.28791400  | -0.19325400 |
| H  | 6.20811900   | 1.94428500  | 1.19617600  |
| H  | 5.85043400   | -1.36496100 | -1.53975400 |
| N  | 7.61136600   | 0.20341500  | -0.27649200 |
| C  | 8.40500900   | 1.38020900  | -0.21947300 |
| C  | 8.24614500   | -1.06649800 | -0.36846600 |
| C  | 8.04991200   | 2.51526500  | -0.96923800 |
| C  | 9.57046500   | 1.41974600  | 0.56190100  |
| C  | 7.80508800   | -2.14382000 | 0.41692200  |
| C  | 9.33953500   | -1.25364200 | -1.23053800 |
| C  | 8.83526600   | 3.66239200  | -0.92688500 |
| H  | 7.16237600   | 2.48328500  | -1.59403400 |
| C  | 10.35286200  | 2.57190600  | 0.60765900  |
| H  | 9.86837900   | 0.53788800  | 1.12103400  |
| C  | 8.42031400   | -3.38869900 | 0.31584200  |
| H  | 6.97460600   | -2.00344200 | 1.10228200  |
| C  | 9.97837100   | -2.48763000 | -1.29997100 |
| H  | 9.69210000   | -0.42264300 | -1.83401100 |
| C  | 9.98397800   | 3.71798100  | -0.11928800 |
| H  | 8.57401100   | 4.53250000  | -1.52232300 |
| H  | 11.26779000  | 2.57331600  | 1.19373000  |
| C  | 9.50904100   | -3.58187700 | -0.55407300 |
| H  | 8.08020800   | -4.20553500 | 0.94653300  |
| H  | 10.83267000  | -2.62997000 | -1.95528500 |
| Co | 0.81719500   | -1.13604400 | 0.31313200  |
| C  | -6.83647100  | 0.60063900  | -0.07318000 |
| C  | -7.72886500  | 1.70082400  | -0.12566900 |
| C  | -7.34952200  | -0.71298700 | -0.06652100 |
| C  | -9.10231400  | 1.46049700  | -0.16756300 |
| O  | -7.15941500  | 2.93599500  | -0.13073700 |
| C  | -8.72212600  | -0.95152900 | -0.11049700 |
| H  | -6.64264600  | -1.53228600 | -0.02938700 |
| C  | -9.61432200  | 0.14970200  | -0.16058600 |
| H  | -9.80998500  | 2.27902100  | -0.20721400 |
| C  | -7.99875400  | 4.09258800  | -0.20064900 |
| O  | -9.29103900  | -2.18500500 | -0.10960400 |
| C  | -11.02246400 | -0.06139900 | -0.20499300 |
| H  | -8.60848500  | 4.05282100  | -1.11536800 |

|    |              |             |             |
|----|--------------|-------------|-------------|
| H  | -8.67679900  | 4.11131500  | 0.66546300  |
| C  | -7.09527700  | 5.31684800  | -0.20640900 |
| C  | -8.44947300  | -3.34218000 | -0.07454900 |
| C  | -12.22371400 | -0.21888800 | -0.24325600 |
| H  | -6.40991000  | 5.24352200  | -1.06115500 |
| H  | -6.47652400  | 5.30147500  | 0.70065300  |
| C  | -7.89207600  | 6.62579900  | -0.27965200 |
| H  | -7.77701300  | -3.33699800 | -0.94526200 |
| H  | -7.83353100  | -3.32405700 | 0.83707900  |
| C  | -9.34897800  | -4.56888700 | -0.09394600 |
| H  | -13.27959600 | -0.37038300 | -0.27758200 |
| H  | -8.58474000  | 6.68471300  | 0.57352800  |
| H  | -8.51803800  | 6.62664500  | -1.18476000 |
| C  | -6.99582200  | 7.87159000  | -0.28694600 |
| H  | -10.03092300 | -4.51883800 | 0.76496600  |
| H  | -9.97260000  | -4.53329000 | -0.99670600 |
| C  | -8.54511300  | -5.87517800 | -0.05675300 |
| H  | -6.30381000  | 7.81291300  | -1.13948900 |
| H  | -6.37055700  | 7.87130800  | 0.61767000  |
| C  | -7.79295900  | 9.17911600  | -0.36079400 |
| H  | -7.91499800  | -5.89598000 | 0.84542900  |
| H  | -7.85564400  | -5.90959700 | -0.91382500 |
| C  | -9.43525100  | -7.12519400 | -0.07704200 |
| H  | -8.47082900  | 9.27707800  | 0.49699900  |
| H  | -7.13023200  | 10.05261600 | -0.36464700 |
| H  | -8.40323500  | 9.21818100  | -1.27231600 |
| H  | -10.12442400 | -7.09120000 | 0.77913400  |
| H  | -10.06417900 | -7.10526600 | -0.97874300 |
| C  | -8.63106400  | -8.42997400 | -0.03921100 |
| H  | -8.01668200  | -8.48890500 | 0.86855500  |
| H  | -9.28940700  | -9.30674300 | -0.05490500 |
| H  | -7.95599300  | -8.50278900 | -0.90164100 |
| N  | 10.73867200  | 4.91118800  | -0.13178700 |
| N  | 10.19229500  | -4.81041200 | -0.67919900 |
| C  | 9.53949500   | -5.90528600 | -0.68201500 |
| H  | 10.08993100  | -6.84478900 | -0.73886700 |
| H  | 8.44249200   | -5.96320000 | -0.64345000 |
| C  | 11.29354600  | 5.33221500  | 0.93544500  |
| H  | 11.90315700  | 6.23505600  | 0.88979900  |
| H  | 11.18675600  | 4.84414000  | 1.91493100  |
| Cl | 2.41825500   | -2.55466900 | 1.19619400  |
| Cl | 0.72216500   | -1.52043000 | -2.07644900 |
| C  | -0.25950500  | -2.60396700 | 0.46237300  |
| O  | -0.92273400  | -3.53166500 | 0.51237000  |
| C  | 1.21197000   | -0.64313700 | 3.69271200  |
| H  | 1.13876900   | -0.21672100 | 4.71246800  |
| O  | 0.57047400   | -0.16690700 | 2.77574900  |
| H  | 1.88118100   | -1.50362700 | 3.52905100  |

---

Total electronic Energy ( $E_{\text{total}}$ ) = -3497.623144 (Hartree/Particle).

DFT-optimized geometry of **(8)**  $[\text{Co}^{\text{II}}(\eta^2\text{-COF-N,N}')(\text{OCH}_3)(\text{CO})\text{Cl}_2]$  (singlet) ( $\text{OC}^*\text{OCH}_3$ ), computed at the B3LYP-D3/ LANL2DZ (Co)/ 6-31+G\* (HCNOCl) level in absence of any solvent.

---

| Atom | x            | y           | z           |
|------|--------------|-------------|-------------|
| C    | -5.43255100  | 0.82078000  | -0.06294100 |
| C    | -4.22936900  | 1.00873200  | -0.03816400 |
| C    | -2.83587100  | 1.24317200  | -0.00774200 |
| C    | -2.29227500  | 2.54226200  | -0.07885000 |
| C    | -1.93240700  | 0.16011300  | 0.09524300  |
| C    | -0.91323800  | 2.70654000  | -0.06037200 |
| H    | -2.95709500  | 3.39655000  | -0.15577200 |
| N    | -0.61937900  | 0.33305300  | 0.12543500  |
| H    | -2.29970300  | -0.85751900 | 0.14441500  |
| C    | -0.09162500  | 1.57978600  | 0.04204400  |
| H    | -0.46686700  | 3.69392000  | -0.12908200 |
| C    | 1.35371500   | 1.61613500  | -0.00642800 |
| N    | 1.99071500   | 0.49385600  | 0.04374500  |
| H    | 1.87300900   | 2.56337500  | -0.15399800 |
| C    | 3.39657400   | 0.44647800  | -0.03511200 |
| C    | 4.19692500   | 1.32494200  | 0.71262800  |
| C    | 3.99900100   | -0.50580900 | -0.87291700 |
| C    | 5.58215500   | 1.25047600  | 0.63135800  |
| H    | 3.73202000   | 2.01754900  | 1.40936700  |
| C    | 5.38068700   | -0.55378000 | -0.97905200 |
| H    | 3.36699100   | -1.17342300 | -1.44670800 |
| C    | 6.19567100   | 0.30870500  | -0.21819600 |
| H    | 6.19646200   | 1.90158800  | 1.24454500  |
| H    | 5.84170900   | -1.27695400 | -1.64345600 |
| N    | 7.60018300   | 0.21076500  | -0.28674500 |
| C    | 8.40954100   | 1.37101900  | -0.15157300 |
| C    | 8.22108300   | -1.06126000 | -0.43583800 |
| C    | 8.08609300   | 2.54914100  | -0.84694800 |
| C    | 9.55965900   | 1.35026300  | 0.65242200  |
| C    | 7.76489100   | -2.16834600 | 0.29745300  |
| C    | 9.31673100   | -1.21919800 | -1.30049200 |
| C    | 8.88727100   | 3.67995000  | -0.72913900 |
| H    | 7.21044900   | 2.56414600  | -1.48898900 |
| C    | 10.35803300  | 2.48590700  | 0.77392000  |
| H    | 9.83283000   | 0.43566400  | 1.17003600  |
| C    | 8.36783100   | -3.41369700 | 0.14201400  |
| H    | 6.93393400   | -2.04993100 | 0.98646000  |
| C    | 9.94291600   | -2.45548000 | -1.42429300 |
| H    | 9.68146900   | -0.36421400 | -1.86183400 |
| C    | 10.02049200  | 3.67429400  | 0.10188300  |
| H    | 8.65068100   | 4.58444500  | -1.28210500 |
| H    | 11.26092700  | 2.44234800  | 1.37673400  |
| C    | 9.45855800   | -3.57778400 | -0.73148600 |
| H    | 8.01744400   | -4.25465800 | 0.73414500  |
| H    | 10.79949900  | -2.57653700 | -2.08087900 |
| Co   | 0.76987400   | -1.03169400 | 0.41335400  |
| C    | -6.82963800  | 0.59357100  | -0.09559000 |
| C    | -7.73025200  | 1.68644200  | -0.16042000 |
| C    | -7.33234300  | -0.72386300 | -0.06490800 |
| C    | -9.10210100  | 1.43509000  | -0.19147200 |
| O    | -7.17012800  | 2.92520000  | -0.18765900 |
| C    | -8.70318500  | -0.97321300 | -0.09737900 |
| H    | -6.61917800  | -1.53710100 | -0.01668300 |
| C    | -9.60379400  | 0.12079900  | -0.16088400 |
| H    | -9.81619000  | 2.24749800  | -0.24034000 |
| C    | -8.01892300  | 4.07542300  | -0.25537600 |
| O    | -9.26314000  | -2.21019700 | -0.07273000 |
| C    | -11.01041800 | -0.10168900 | -0.19448600 |

|    |              |             |             |
|----|--------------|-------------|-------------|
| H  | -8.63671700  | 4.02651500  | -1.16418900 |
| H  | -8.68876600  | 4.09289600  | 0.61700400  |
| C  | -7.12480600  | 5.30633000  | -0.27522600 |
| C  | -8.41327900  | -3.36071300 | -0.01653600 |
| C  | -12.21053700 | -0.26911700 | -0.22394500 |
| H  | -6.44706300  | 5.23452700  | -1.13620900 |
| H  | -6.49750300  | 5.29966300  | 0.62601800  |
| C  | -7.93227200  | 6.60886500  | -0.34652100 |
| H  | -7.74398900  | -3.36879600 | -0.88972200 |
| H  | -7.79446700  | -3.31916200 | 0.89228100  |
| C  | -9.30419900  | -4.59374200 | -0.00741700 |
| H  | -13.26542300 | -0.42922200 | -0.24961900 |
| H  | -8.61721400  | 6.66607500  | 0.51294100  |
| H  | -8.56673700  | 6.60113300  | -1.24566400 |
| C  | -7.04561900  | 7.86136300  | -0.36733600 |
| H  | -9.98260900  | -4.53130700 | 0.85344100  |
| H  | -9.93203400  | -4.58056300 | -0.90787700 |
| C  | -8.49089200  | -5.89335700 | 0.05219700  |
| H  | -6.36140700  | 7.80457000  | -1.22631400 |
| H  | -6.41176400  | 7.86941700  | 0.53121400  |
| C  | -7.85342000  | 9.16246700  | -0.43854700 |
| H  | -7.85657300  | -5.89167800 | 0.95160800  |
| H  | -7.80515000  | -5.94012200 | -0.80733600 |
| C  | -9.37227100  | -7.14970600 | 0.06100400  |
| H  | -8.52358200  | 9.25867800  | 0.42544900  |
| H  | -7.19743100  | 10.04092300 | -0.45220300 |
| H  | -8.47282100  | 9.19330000  | -1.34421700 |
| H  | -10.05734200 | -7.10363200 | 0.91986700  |
| H  | -10.00582000 | -7.15195500 | -0.83769500 |
| C  | -8.55865800  | -8.44781000 | 0.12049000  |
| H  | -7.93932200  | -8.48443600 | 1.02602400  |
| H  | -9.21085700  | -9.32926900 | 0.12559000  |
| H  | -7.88748300  | -8.53303500 | -0.74387300 |
| N  | 10.79352900  | 4.85391200  | 0.16725600  |
| N  | 10.13060100  | -4.80592900 | -0.90937300 |
| C  | 9.46783100   | -5.89338100 | -0.96371900 |
| H  | 10.00983200  | -6.83449400 | -1.06049000 |
| H  | 8.37019000   | -5.94277700 | -0.93148200 |
| C  | 11.32682500  | 5.21198100  | 1.26791400  |
| H  | 11.95141600  | 6.10554600  | 1.28298500  |
| H  | 11.18679400  | 4.67759700  | 2.21856400  |
| Cl | 2.35523500   | -2.62450800 | 0.81420500  |
| Cl | 0.59058300   | -1.55126500 | -1.84188900 |
| C  | -0.30132100  | -2.46380800 | 0.86813000  |
| O  | -0.96901600  | -3.32875500 | 1.18534300  |
| O  | 0.59156200   | -0.45102200 | 2.21005700  |
| C  | 1.65301500   | -0.60862300 | 3.11289300  |
| H  | 2.60895700   | -0.22713600 | 2.71873600  |
| H  | 1.39214500   | -0.02345400 | 4.01043300  |
| H  | 1.81371300   | -1.65398000 | 3.41290000  |

---

Total electronic Energy ( $E_{\text{total}}$ ) = -3498.210586 (Hartree/Particle).

DFT-optimized geometry of **(8a)**  $[\text{Co}^{\text{II}}(\eta^2\text{-COF-N,N}')(\text{COCH}_2\text{OH})\text{Cl}_2]$  (singlet) (\* $\text{COCH}_2\text{OH}$ ), computed at the B3LYP-D3/ LANL2DZ (Co)/ 6-31+G\* (HCNOCl) level in absence of any solvent.

| Atom | x            | y           | z           |
|------|--------------|-------------|-------------|
| C    | -5.37851100  | 0.89322100  | -0.02166000 |
| C    | -4.18327800  | 1.10264600  | 0.08173400  |
| C    | -2.79443000  | 1.33711200  | 0.20488200  |
| C    | -2.24455400  | 2.63587600  | 0.21687200  |
| C    | -1.90220200  | 0.24876600  | 0.32599000  |
| C    | -0.86766900  | 2.79074700  | 0.30361400  |
| H    | -2.90060600  | 3.49680800  | 0.13634800  |
| N    | -0.58758400  | 0.41142700  | 0.45216400  |
| H    | -2.26454900  | -0.77243300 | 0.30785800  |
| C    | -0.04735300  | 1.65941100  | 0.40115100  |
| H    | -0.41559000  | 3.77773900  | 0.27471500  |
| C    | 1.40338000   | 1.72648800  | 0.33845800  |
| N    | 2.06623300   | 0.62235300  | 0.26823700  |
| H    | 1.87651200   | 2.70925600  | 0.26006400  |
| C    | 3.45808100   | 0.58113900  | 0.13467600  |
| C    | 4.32132100   | 1.51403500  | 0.73922700  |
| C    | 4.00206400   | -0.46463300 | -0.63342400 |
| C    | 5.69634600   | 1.40438100  | 0.57967800  |
| H    | 3.91859300   | 2.28780700  | 1.38819800  |
| C    | 5.37229700   | -0.54879600 | -0.82568100 |
| H    | 3.32496000   | -1.17886800 | -1.08884500 |
| C    | 6.24442300   | 0.37330200  | -0.21222400 |
| H    | 6.35789600   | 2.10076500  | 1.08467400  |
| H    | 5.77984200   | -1.34504600 | -1.43945200 |
| N    | 7.63989000   | 0.25081400  | -0.36167200 |
| C    | 8.46577000   | 1.40743700  | -0.38539100 |
| C    | 8.24173300   | -1.03585400 | -0.45599200 |
| C    | 8.10714200   | 2.52342400  | -1.16119000 |
| C    | 9.66701100   | 1.44063300  | 0.33945100  |
| C    | 7.83671100   | -2.07721500 | 0.39402800  |
| C    | 9.26882100   | -1.27261000 | -1.38439200 |
| C    | 8.92515700   | 3.64773700  | -1.19889400 |
| H    | 7.19079300   | 2.49436400  | -1.74309100 |
| C    | 10.48236100  | 2.57014600  | 0.30545000  |
| H    | 9.96576900   | 0.57122700  | 0.91737400  |
| C    | 8.41957100   | -3.33753300 | 0.29239200  |
| H    | 7.05943500   | -1.89639000 | 1.13042000  |
| C    | 9.87771200   | -2.52155400 | -1.45701000 |
| H    | 9.59451100   | -0.46828900 | -2.03713800 |
| C    | 10.11142900  | 3.69882300  | -0.44725200 |
| H    | 8.66064100   | 4.50262000  | -1.81455200 |
| H    | 11.42346100  | 2.56670000  | 0.84843200  |
| C    | 9.44077700   | -3.58107200 | -0.64430000 |
| H    | 8.10968900   | -4.12659600 | 0.97205900  |
| H    | 10.68181100  | -2.70274000 | -2.16416100 |
| C    | -6.76186000  | 0.61794500  | -0.14759500 |
| C    | -7.70310300  | 1.67492300  | -0.22073100 |
| C    | -7.20794000  | -0.71884400 | -0.20289900 |
| C    | -9.05863500  | 1.36988100  | -0.34409400 |
| O    | -7.19592600  | 2.93609300  | -0.16267700 |
| C    | -8.56263200  | -1.02219500 | -0.32841700 |
| H    | -6.46360300  | -1.50324600 | -0.14773300 |
| C    | -9.50435500  | 0.03604600  | -0.39897100 |
| H    | -9.80316100  | 2.15393800  | -0.40146400 |
| C    | -8.08747400  | 4.05170900  | -0.24676000 |
| O    | -9.06792300  | -2.28101900 | -0.39043400 |
| C    | -10.89590400 | -0.24124900 | -0.52582800 |

|    |              |             |             |
|----|--------------|-------------|-------------|
| H  | -8.64570400  | 4.00919900  | -1.19370500 |
| H  | -8.81025700  | 4.01186100  | 0.58167300  |
| C  | -7.24824900  | 5.31864600  | -0.17106200 |
| C  | -8.17103400  | -3.39643100 | -0.33876700 |
| C  | -12.08409400 | -0.45542100 | -0.63383200 |
| H  | -6.51669000  | 5.30488500  | -0.98980800 |
| H  | -6.67723100  | 5.30670000  | 0.76683200  |
| C  | -8.10580100  | 6.58824700  | -0.25069800 |
| H  | -7.45438000  | -3.33314800 | -1.17084200 |
| H  | -7.60632600  | -3.37321100 | 0.60508000  |
| C  | -9.00453100  | -4.66499600 | -0.43855700 |
| H  | -13.12767700 | -0.65723800 | -0.72967700 |
| H  | -8.84333400  | 6.58745900  | 0.56612900  |
| H  | -8.68390200  | 6.58503500  | -1.18710700 |
| C  | -7.27508700  | 7.87657000  | -0.17705800 |
| H  | -9.73205600  | -4.67401100 | 0.38365200  |
| H  | -9.58123100  | -4.63444000 | -1.37224100 |
| C  | -8.13734800  | -5.92994300 | -0.39274800 |
| H  | -6.53849900  | 7.87779200  | -0.99352800 |
| H  | -6.69742400  | 7.88021000  | 0.75867100  |
| C  | -8.13309100  | 9.14464900  | -0.25671000 |
| H  | -7.55448000  | -5.94513000 | 0.54059600  |
| H  | -7.40328600  | -5.90482300 | -1.21213300 |
| C  | -8.95977800  | -7.22171300 | -0.49340600 |
| H  | -8.85772800  | 9.18321700  | 0.56689200  |
| H  | -7.51648000  | 10.04967300 | -0.20212800 |
| H  | -8.69757500  | 9.18062900  | -1.19740800 |
| H  | -9.69313200  | -7.24738900 | 0.32563300  |
| H  | -9.54158000  | -7.20707800 | -1.42639400 |
| C  | -8.09234200  | -8.48510700 | -0.44759800 |
| H  | -7.52310700  | -8.53930900 | 0.48936500  |
| H  | -8.70288800  | -9.39303000 | -0.52129000 |
| H  | -7.37075200  | -8.49860000 | -1.27455300 |
| N  | 10.89838500  | 4.86728800  | -0.53976800 |
| N  | 10.09021300  | -4.82715800 | -0.77459600 |
| C  | 9.41694300   | -5.90702400 | -0.70130000 |
| H  | 9.94369500   | -6.85961900 | -0.76385500 |
| H  | 8.32380800   | -5.93959300 | -0.59063500 |
| C  | 11.50717400  | 5.31448100  | 0.48657300  |
| H  | 12.14011700  | 6.19580500  | 0.37962900  |
| H  | 11.42548900  | 4.86991400  | 1.48890000  |
| Co | 0.71929900   | -1.02940000 | 0.69942500  |
| Cl | 2.32679500   | -2.57146300 | 1.22549900  |
| Cl | 0.44428500   | -1.64208100 | -1.42348700 |
| C  | -0.51255300  | -2.17427400 | 1.54346600  |
| O  | -1.36486200  | -2.95869700 | 1.22818200  |
| C  | -0.22479600  | -1.68408600 | 2.96182000  |
| H  | -1.10756300  | -1.21927900 | 3.41031800  |
| H  | 0.15774400   | -2.48036300 | 3.60617900  |
| O  | 0.77302100   | -0.63095400 | 2.76114400  |
| H  | 1.65640900   | -1.02339400 | 2.92298700  |

---

Total electronic Energy ( $E_{\text{total}}$ ) = -3498.210055 (Hartree/Particle).

DFT-optimized geometry of (9)  $[\text{Co}^{\text{II}}(\eta^2\text{-COF-N,N}')(\text{HOCH}_3)(\text{CO})\text{Cl}_2]$  (doublet) ( $\text{OC}^*\text{HOCH}_3$ ), computed at the UB3LYP-D3/ LANL2DZ (Co)/ 6-31+G\* (HCNOCl) level in absence of any solvent.

| Atom | x           | y           | z           |
|------|-------------|-------------|-------------|
| C    | -5.45263500 | 0.81295600  | -0.03846800 |
| C    | -4.24675600 | 0.98521800  | -0.03812300 |
| C    | -2.84946500 | 1.19889400  | -0.04251400 |
| C    | -2.28958900 | 2.49049000  | -0.13444800 |
| C    | -1.95695900 | 0.10482900  | 0.04467400  |
| C    | -0.90844200 | 2.63442300  | -0.14084200 |
| H    | -2.94348900 | 3.35376900  | -0.20557200 |
| N    | -0.63791100 | 0.24903800  | 0.04675400  |
| H    | -2.34021700 | -0.90721800 | 0.11019200  |
| C    | -0.10122100 | 1.49387400  | -0.04814400 |
| H    | -0.45006000 | 3.61557700  | -0.22272200 |
| C    | 1.34505700  | 1.52566100  | -0.08720900 |
| N    | 1.99209300  | 0.40495800  | -0.02174600 |
| H    | 1.86317400  | 2.47444200  | -0.22822500 |
| C    | 3.40235700  | 0.38484300  | -0.07058200 |
| C    | 4.17353200  | 1.31024600  | 0.65094000  |
| C    | 4.04030600  | -0.59297200 | -0.85140900 |
| C    | 5.56170900  | 1.25591100  | 0.60392500  |
| H    | 3.68689300  | 2.03242400  | 1.30196500  |
| C    | 5.42373600  | -0.62022400 | -0.92806800 |
| H    | 3.43111100  | -1.29090800 | -1.41408600 |
| C    | 6.20867900  | 0.28844800  | -0.18968500 |
| H    | 6.15168100  | 1.94449700  | 1.19990900  |
| H    | 5.90969500  | -1.36324200 | -1.55145900 |
| N    | 7.61573100  | 0.21084400  | -0.22303500 |
| C    | 8.40292500  | 1.38933900  | -0.12039600 |
| C    | 8.25986200  | -1.05582800 | -0.30380900 |
| C    | 8.07709100  | 2.53039500  | -0.87412100 |
| C    | 9.53374700  | 1.42347600  | 0.71025000  |
| C    | 7.79958800  | -2.14072000 | 0.45954700  |
| C    | 9.38181500  | -1.22989600 | -1.13088200 |
| C    | 8.85683100  | 3.67886800  | -0.78742100 |
| H    | 7.21731000  | 2.50203900  | -1.53680500 |
| C    | 10.31046600 | 2.57690100  | 0.80030500  |
| H    | 9.80960700  | 0.53682700  | 1.27310400  |
| C    | 8.42509400  | -3.38136800 | 0.36979000  |
| H    | 6.94649400  | -2.01008200 | 1.11857800  |
| C    | 10.02973900 | -2.45978400 | -1.18832000 |
| H    | 9.74899800  | -0.39217000 | -1.71610400 |
| C    | 9.96977900  | 3.72900900  | 0.06916500  |
| H    | 8.61920100  | 4.55402600  | -1.38532700 |
| H    | 11.19955700 | 2.57493300  | 1.42484800  |
| C    | 9.54257600  | -3.56186300 | -0.46570400 |
| H    | 8.06950000  | -4.20460000 | 0.98332700  |
| H    | 10.90594600 | -2.59262900 | -1.81610000 |
| Co   | 0.82586300  | -1.18453100 | 0.12706700  |
| C    | -6.85289600 | 0.60318000  | -0.04258000 |
| C    | -7.74142900 | 1.70689200  | -0.08779700 |
| C    | -7.37110500 | -0.70804300 | -0.00457900 |
| C    | -9.11654500 | 1.47230200  | -0.09207800 |
| O    | -7.16702500 | 2.93905700  | -0.12397500 |

|    |              |             |             |
|----|--------------|-------------|-------------|
| C  | -8.74528100  | -0.94076200 | -0.01086600 |
| H  | -6.66703300  | -1.52997200 | 0.02701900  |
| C  | -9.63363000  | 0.16412500  | -0.05416400 |
| H  | -9.82154400  | 2.29339000  | -0.12542300 |
| C  | -8.00301900  | 4.09882500  | -0.18513500 |
| O  | -9.31951900  | -2.17105900 | 0.02145100  |
| C  | -11.04326100 | -0.04112700 | -0.06062100 |
| H  | -8.63598500  | 4.05182800  | -1.08353900 |
| H  | -8.65852800  | 4.12984300  | 0.69775200  |
| C  | -7.09480300  | 5.31882700  | -0.22717900 |
| C  | -8.48262100  | -3.33199400 | 0.05163900  |
| C  | -12.24570700 | -0.19377400 | -0.06683200 |
| H  | -6.43197800  | 5.23353100  | -1.09844400 |
| H  | -6.45306200  | 5.31021100  | 0.66387400  |
| C  | -7.88773500  | 6.63050000  | -0.29372500 |
| H  | -7.83188700  | -3.34170500 | -0.83539900 |
| H  | -7.84442800  | -3.30448900 | 0.94753800  |
| C  | -9.38796600  | -4.55436000 | 0.07079900  |
| H  | -13.30275700 | -0.34100000 | -0.07264400 |
| H  | -8.55822800  | 6.70116400  | 0.57609200  |
| H  | -8.53646200  | 6.62488200  | -1.18262500 |
| C  | -6.98675300  | 7.87216400  | -0.33653300 |
| H  | -10.04782100 | -4.48995700 | 0.94583900  |
| H  | -10.03390600 | -4.52730600 | -0.81643500 |
| C  | -8.58934000  | -5.86396700 | 0.10470100  |
| H  | -6.31692400  | 7.80183200  | -1.20575900 |
| H  | -6.33870100  | 7.87825400  | 0.55189200  |
| C  | -7.78007200  | 9.18237900  | -0.40341400 |
| H  | -7.93704300  | -5.87644200 | 0.99110200  |
| H  | -7.92165100  | -5.91256700 | -0.76879300 |
| C  | -9.48541500  | -7.10977900 | 0.12241500  |
| H  | -8.43542200  | 9.29199800  | 0.47030800  |
| H  | -7.11401700  | 10.05283600 | -0.43304200 |
| H  | -8.41320100  | 9.21494700  | -1.29946100 |
| H  | -10.15266000 | -7.06178800 | 0.99511800  |
| H  | -10.13671300 | -7.09798600 | -0.76341800 |
| C  | -8.68645800  | -8.41786500 | 0.15644400  |
| H  | -8.04970800  | -8.46849400 | 1.04915000  |
| H  | -9.34899100  | -9.29152100 | 0.16831600  |
| H  | -8.03367500  | -8.50472400 | -0.72170800 |
| N  | 10.72158800  | 4.92365100  | 0.10031500  |
| N  | 10.23675300  | -4.78558900 | -0.57678500 |
| C  | 9.59046000   | -5.88375700 | -0.61087100 |
| H  | 10.14768700  | -6.81987900 | -0.65589200 |
| H  | 8.49312700   | -5.94761600 | -0.61065700 |
| C  | 11.22635100  | 5.33690700  | 1.19507500  |
| H  | 11.83561700  | 6.24105900  | 1.18455100  |
| H  | 11.07610900  | 4.84050400  | 2.16461200  |
| Cl | 2.45397700   | -2.66286200 | 1.00361400  |
| Cl | 0.80036700   | -1.43911600 | -2.27009600 |
| C  | -0.24809600  | -2.66723900 | 0.13598800  |
| O  | -0.91050800  | -3.59509500 | 0.10190600  |
| O  | 0.54117100   | -0.89496800 | 2.54380300  |
| C  | 1.06238600   | 0.27733100  | 3.16834300  |
| H  | 1.06189500   | 0.17745400  | 4.26179700  |
| H  | 2.08154100   | 0.49376400  | 2.82221600  |
| H  | 0.40565700   | 1.10633300  | 2.88952900  |
| H  | 1.20108400   | -1.61523600 | 2.62150300  |

---



Total electronic Energy ( $E_{\text{total}}$ ) = -3498.847366 (Hartree/Particle).

DFT-optimized geometry of **(9a)**  $[\text{Co}^{\text{II}}(\eta^2\text{-COF-N,N'})\text{(O)}\text{(CO)}\text{Cl}_2]$  (doublet) ( $\text{OC}^*\text{O}$ ), computed at the UB3LYP-D3/ LANL2DZ (Co)/ 6-31+G\* (HCNOCl) level in absence of any solvent.

| Atom | x            | y           | z           |
|------|--------------|-------------|-------------|
| C    | 5.40290800   | 0.80825500  | 0.01060200  |
| C    | 4.19888200   | 0.99219800  | -0.00397000 |
| C    | 2.80534300   | 1.22552200  | -0.01992700 |
| C    | 2.26089700   | 2.52495900  | 0.05989700  |
| C    | 1.90192200   | 0.14394800  | -0.11974500 |
| C    | 0.88273400   | 2.68966300  | 0.05087800  |
| H    | 2.92627500   | 3.37907100  | 0.13349000  |
| N    | 0.58544800   | 0.31581600  | -0.13739100 |
| H    | 2.26914300   | -0.87301400 | -0.17898800 |
| C    | 0.05713200   | 1.56430800  | -0.04630900 |
| H    | 0.43723100   | 3.67711700  | 0.12269900  |
| C    | -1.38777000  | 1.60321600  | 0.00123500  |
| N    | -2.02263400  | 0.47975400  | -0.04058100 |
| H    | -1.90714600  | 2.55310600  | 0.12848400  |
| C    | -3.42737900  | 0.42947400  | 0.00830400  |
| C    | -4.21191000  | 1.29860800  | -0.76708000 |
| C    | -4.04731600  | -0.51487200 | 0.84324700  |
| C    | -5.59810700  | 1.22535300  | -0.71214400 |
| H    | -3.73223300  | 1.97779900  | -1.46660900 |
| C    | -5.43021100  | -0.56088400 | 0.92310900  |
| H    | -3.42732500  | -1.17749200 | 1.43577900  |
| C    | -6.22927600  | 0.29438100  | 0.13666300  |
| H    | -6.19972700  | 1.86665700  | -1.34778700 |
| H    | -5.90499600  | -1.27634300 | 1.58612100  |
| N    | -7.63421700  | 0.19801900  | 0.17858800  |
| C    | -8.44089800  | 1.35522500  | 0.00510100  |
| C    | -8.25929500  | -1.07125400 | 0.33536800  |
| C    | -8.13456200  | 2.54487300  | 0.68839400  |
| C    | -9.57191300  | 1.31957300  | -0.82488600 |
| C    | -7.79255600  | -2.18887200 | -0.37486700 |
| C    | -9.36977200  | -1.21501200 | 1.18329800  |
| C    | -8.93372300  | 3.67259700  | 0.53341100  |
| H    | -7.27401800  | 2.57134400  | 1.35017400  |
| C    | -10.36806600 | 2.45214700  | -0.98379200 |
| H    | -9.83181300  | 0.39630900  | -1.33386000 |
| C    | -8.40050000  | -3.43091000 | -0.21247300 |
| H    | -6.95036000  | -2.08093700 | -1.05187500 |
| C    | -10.0006300  | -2.44850100 | 1.31388500  |
| H    | -9.74245200  | -0.35143300 | 1.72598700  |
| C    | -10.04718300 | 3.65178000  | -0.32370300 |
| H    | -8.71084600  | 4.58639500  | 1.07668600  |
| H    | -11.25645800 | 2.39780800  | -1.60691900 |

|    |              |             |             |
|----|--------------|-------------|-------------|
| C  | -9.50602100  | -3.58100200 | 0.64486200  |
| H  | -8.04224600  | -4.28040100 | -0.78745200 |
| H  | -10.86794900 | -2.55913900 | 1.95732600  |
| Co | -0.79569200  | -1.05795000 | -0.36435300 |
| C  | 6.80109900   | 0.58793600  | 0.02893000  |
| C  | 7.69566000   | 1.68540100  | 0.10075300  |
| C  | 7.31084100   | -0.72623300 | -0.02374700 |
| C  | 9.06919200   | 1.44164700  | 0.11705800  |
| O  | 7.12852900   | 2.92005900  | 0.14881400  |
| C  | 8.68324100   | -0.96781300 | -0.00638800 |
| H  | 6.60209100   | -1.54300100 | -0.07706200 |
| C  | 9.57793300   | 0.13088900  | 0.06452100  |
| H  | 9.77900200   | 2.25746500  | 0.17088200  |
| C  | 7.97103600   | 4.07487400  | 0.22349400  |
| O  | 9.25043300   | -2.20056400 | -0.05282100 |
| C  | 10.98597000  | -0.08388900 | 0.08323000  |
| H  | 8.59635100   | 4.01867100  | 1.12665400  |
| H  | 8.63347000   | 4.10667000  | -0.65404600 |
| C  | 7.06967400   | 5.29988400  | 0.26523800  |
| C  | 8.40738800   | -3.35566000 | -0.12074700 |
| C  | 12.18716600  | -0.24491600 | 0.10025400  |
| H  | 6.39943300   | 5.21381300  | 1.13078600  |
| H  | 6.43521600   | 5.30013200  | -0.63102700 |
| C  | 7.86987300   | 6.60640400  | 0.34547700  |
| H  | 7.74494900   | -3.38166400 | 0.75730000  |
| H  | 7.78149000   | -3.30360600 | -1.02414100 |
| C  | 9.30593100   | -4.58263400 | -0.15606600 |
| H  | 13.24314000  | -0.39932900 | 0.11485900  |
| H  | 8.54760100   | 6.67778800  | -0.51860900 |
| H  | 8.51144400   | 6.59201000  | 1.23946300  |
| C  | 6.97587700   | 7.85313100  | 0.38789600  |
| H  | 9.97737900   | -4.50221700 | -1.02086200 |
| H  | 9.94042600   | -4.57973900 | 0.73979400  |
| C  | 8.50028600   | -5.88627800 | -0.23033000 |
| H  | 6.29886800   | 7.78219500  | 1.25152100  |
| H  | 6.33491600   | 7.86779200  | -0.50551700 |
| C  | 7.77643100   | 9.15818500  | 0.46793500  |
| H  | 7.85924200   | -5.87435200 | -1.12487600 |
| H  | 7.82137000   | -5.95108200 | 0.63345000  |
| C  | 9.38942900   | -7.13668400 | -0.26572600 |
| H  | 8.43908000   | 9.26853400  | -0.40014100 |
| H  | 7.11529100   | 10.03237000 | 0.49701700  |
| H  | 8.40279200   | 9.18226200  | 1.36899900  |
| H  | 10.06770700  | -7.07255400 | -1.12879800 |
| H  | 10.02969400  | -7.14920900 | 0.62810900  |
| C  | 8.58348800   | -8.43879900 | -0.33995700 |
| H  | 7.95763800   | -8.46493500 | -1.24135600 |
| H  | 9.24114700   | -9.31585700 | -0.36401300 |
| H  | 7.91939900   | -8.54212600 | 0.52789700  |
| N  | -10.81956600 | 4.82910700  | -0.42682800 |
| N  | -10.18341100 | -4.80539800 | 0.82815700  |
| C  | -9.52390200  | -5.89322500 | 0.90823200  |
| H  | -10.06938300 | -6.83194900 | 1.00857700  |
| H  | -8.42598000  | -5.94508000 | 0.89489500  |
| C  | -11.32485200 | 5.16921200  | -1.54623500 |
| H  | -11.94992300 | 6.06143800  | -1.59121000 |
| H  | -11.15980300 | 4.62029400  | -2.48448600 |
| Cl | -2.38779000  | -2.60527300 | -0.87470900 |
| Cl | -0.66971100  | -1.52927500 | 1.90582700  |
| C  | 0.27094300   | -2.53299500 | -0.70444800 |

|   |             |             |             |
|---|-------------|-------------|-------------|
| O | 0.93404700  | -3.42668100 | -0.93869500 |
| O | -0.74966600 | -0.65030600 | -2.14039700 |

---

Total electronic Energy ( $E_{\text{total}}$ ) = -3458.230496 (Hartree/Particle).

DFT-optimized geometry of **(10)**  $[\text{Co}^{\text{II}}(\eta^2\text{-COF-N,N}')(\text{CH}_3)(\text{CO})\text{Cl}_2]$  (singlet) ( $\text{OC}^*\text{CH}_3$ ), computed at the B3LYP-D3/ LANL2DZ (Co)/ 6-31+G\* (HCNOCl) level in absence of any solvent.

---

| Atom | x           | y           | z           |
|------|-------------|-------------|-------------|
| C    | -5.39692300 | 0.81652800  | 0.01063100  |
| C    | -4.19363100 | 1.00379800  | 0.03496400  |
| C    | -2.79973800 | 1.23772000  | 0.05778600  |
| C    | -2.25570900 | 2.53437300  | -0.06576200 |
| C    | -1.89958700 | 0.16020000  | 0.20737300  |
| C    | -0.87806100 | 2.69628200  | -0.04910400 |
| H    | -2.91975800 | 3.38482000  | -0.18128400 |
| N    | -0.58075200 | 0.32599800  | 0.23837900  |
| H    | -2.27242900 | -0.85269500 | 0.29484600  |
| C    | -0.05600300 | 1.57317300  | 0.10072700  |
| H    | -0.42860700 | 3.67840100  | -0.16043300 |
| C    | 1.38734000  | 1.60569100  | 0.05568300  |
| N    | 2.01281700  | 0.47630200  | 0.13524300  |
| H    | 1.91515400  | 2.54435800  | -0.11207500 |
| C    | 3.42121900  | 0.42889400  | 0.06169600  |
| C    | 4.21747600  | 1.28567100  | 0.83665400  |
| C    | 4.02515300  | -0.49583900 | -0.80518300 |
| C    | 5.60409200  | 1.21171300  | 0.76033700  |
| H    | 3.74911900  | 1.96356400  | 1.54581500  |
| C    | 5.40704200  | -0.53865500 | -0.90890600 |
| H    | 3.39325000  | -1.14086600 | -1.40468600 |
| C    | 6.21946900  | 0.29756700  | -0.11629200 |
| H    | 6.21635700  | 1.84415900  | 1.39475700  |
| H    | 5.87050900  | -1.23803900 | -1.59669500 |
| N    | 7.62494700  | 0.20070000  | -0.18395300 |
| C    | 8.43409000  | 1.35578200  | -0.01170200 |
| C    | 8.24489900  | -1.06698200 | -0.36810400 |
| C    | 8.11243700  | 2.55495500  | -0.67117300 |
| C    | 9.58260500  | 1.31047700  | 0.79379400  |
| C    | 7.78094300  | -2.19622000 | 0.32561500  |
| C    | 9.34668800  | -1.19986200 | -1.22932200 |
| C    | 8.91345700  | 3.68146600  | -0.51685600 |
| H    | 7.23820200  | 2.58985600  | -1.31434400 |
| C    | 10.38074500 | 2.44173400  | 0.95197100  |
| H    | 9.85469500  | 0.38035100  | 1.28354800  |
| C    | 8.38216000  | -3.43737100 | 0.13422900  |
| H    | 6.94454700  | -2.09871800 | 1.01125700  |
| C    | 9.97108200  | -2.43300000 | -1.38831400 |
| H    | 9.71722900  | -0.32835500 | -1.76065200 |
| C    | 10.04485800 | 3.65033400  | 0.31609400  |
| H    | 8.67819500  | 4.60253000  | -1.04239200 |
| H    | 11.28233300 | 2.37929600  | 1.55510300  |
| C    | 9.47902100  | -3.57597000 | -0.73593000 |
| H    | 8.02484700  | -4.29623600 | 0.69572700  |

|    |              |             |             |
|----|--------------|-------------|-------------|
| H  | 10.83203500  | -2.53488900 | -2.04245200 |
| Co | 0.79658600   | -1.06255800 | 0.42127900  |
| C  | -6.79414100  | 0.58988700  | -0.02045300 |
| C  | -7.69352300  | 1.68219000  | -0.10768500 |
| C  | -7.29796600  | -0.72643400 | 0.03294000  |
| C  | -9.06553900  | 1.43146400  | -0.13702800 |
| O  | -7.13219300  | 2.91973800  | -0.15630400 |
| C  | -8.66893600  | -0.97520200 | 0.00143300  |
| H  | -6.58561400  | -1.53935600 | 0.09627200  |
| C  | -9.56840000  | 0.11838100  | -0.08366500 |
| H  | -9.77881800  | 2.24342300  | -0.20234100 |
| C  | -7.97952300  | 4.06885400  | -0.25588300 |
| O  | -9.23005100  | -2.21095100 | 0.04612200  |
| C  | -10.97512200 | -0.10350700 | -0.11646300 |
| H  | -8.59288400  | 3.99845600  | -1.16623600 |
| H  | -8.65356600  | 4.10800200  | 0.61255300  |
| C  | -7.08408600  | 5.29811400  | -0.30109900 |
| C  | -8.38133400  | -3.36148900 | 0.11957500  |
| C  | -12.17529300 | -0.27051600 | -0.14555300 |
| H  | -6.40262800  | 5.20517900  | -1.15709400 |
| H  | -6.46078500  | 5.31244500  | 0.60286800  |
| C  | -7.88990400  | 6.59932400  | -0.40700300 |
| H  | -7.71061200  | -3.38216300 | -0.75223600 |
| H  | -7.76404500  | -3.30790700 | 1.02883600  |
| C  | -9.27343300  | -4.59343000 | 0.14419600  |
| H  | -13.23024800 | -0.43025600 | -0.17113400 |
| H  | -8.57883800  | 6.67750800  | 0.44761100  |
| H  | -8.52011400  | 6.57082100  | -1.30869100 |
| C  | -7.00189800  | 7.85018100  | -0.45334300 |
| H  | -9.95377900  | -4.51822700 | 1.00251600  |
| H  | -9.89915800  | -4.59240000 | -0.75780800 |
| C  | -8.46145400  | -5.89280400 | 0.22399400  |
| H  | -6.31366900  | 7.77237600  | -1.30743500 |
| H  | -6.37232100  | 7.87904300  | 0.44781000  |
| C  | -7.80804500  | 9.14993700  | -0.55933500 |
| H  | -7.82956200  | -5.87923500 | 1.12503500  |
| H  | -7.77342600  | -5.95208000 | -0.63289200 |
| C  | -9.34404500  | -7.14810900 | 0.24783200  |
| H  | -8.48225000  | 9.26728500  | 0.29888800  |
| H  | -7.15110700  | 10.02721600 | -0.59075600 |
| H  | -8.42304300  | 9.15976900  | -1.46845200 |
| H  | -10.03161000 | -7.08941800 | 1.10394700  |
| H  | -9.97493400  | -7.16234300 | -0.65261100 |
| C  | -8.53180700  | -8.44596900 | 0.32779800  |
| H  | -7.91518100  | -8.47055400 | 1.23559600  |
| H  | -9.18485300  | -9.32667400 | 0.34322700  |
| H  | -7.85815700  | -8.54381600 | -0.53327000 |
| N  | 10.81726800  | 4.82770600  | 0.41946200  |
| N  | 10.14907700  | -4.79963100 | -0.94918100 |
| C  | 9.48362000   | -5.88276200 | -1.04330500 |
| H  | 10.02367700  | -6.82184400 | -1.16709700 |
| H  | 8.38567900   | -5.92992000 | -1.01996500 |
| C  | 11.35183000  | 5.14994600  | 1.53056300  |
| H  | 11.97580400  | 6.04302600  | 1.57402400  |
| H  | 11.21360900  | 4.58467900  | 2.46346400  |
| Cl | 2.37781800   | -2.68421000 | 0.76180800  |
| Cl | 0.59145400   | -1.39629900 | -1.92385800 |
| C  | -0.28452500  | -2.49545600 | 0.67655600  |
| O  | -0.97339200  | -3.39227000 | 0.83079300  |
| C  | 0.88694100   | -0.70431000 | 2.39964200  |

|   |            |             |            |
|---|------------|-------------|------------|
| H | 0.58663700 | -1.58216800 | 2.97523300 |
| H | 1.93804700 | -0.48681900 | 2.59704700 |
| H | 0.24694500 | 0.15196600  | 2.63509000 |

---

Total electronic Energy ( $E_{\text{total}}$ ) = -3422.988417 (Hartree/Particle).

DFT-optimized geometry of **(10a)** [ $\text{Co}^{\text{II}}(\eta^2\text{-COF-N,N})(\text{COCH}_3)\text{Cl}_2$ ] (singlet) (\* $\text{COCH}_3$ ), computed at the B3LYP-D3/ LANL2DZ (Co)/ 6-31+G\* (HCNOCl) level in absence of any solvent.

---

| Atom | x            | y           | z           |
|------|--------------|-------------|-------------|
| C    | 5.35407300   | 0.89092800  | -0.01638700 |
| C    | 4.15880100   | 1.09892900  | -0.12315100 |
| C    | 2.76950900   | 1.32817000  | -0.24573100 |
| C    | 2.21507700   | 2.62504500  | -0.27022200 |
| C    | 1.88024000   | 0.23568500  | -0.35106300 |
| C    | 0.83772300   | 2.77506300  | -0.35997600 |
| H    | 2.86831100   | 3.48896200  | -0.19927300 |
| N    | 0.56354300   | 0.39126200  | -0.47920400 |
| H    | 2.24448500   | -0.78442800 | -0.32002500 |
| C    | 0.02044300   | 1.64052400  | -0.44658300 |
| H    | 0.38303800   | 3.76114800  | -0.34378100 |
| C    | -1.43062800  | 1.70318600  | -0.39811300 |
| N    | -2.09150000  | 0.59521600  | -0.33698600 |
| H    | -1.90725400  | 2.68435000  | -0.32073600 |
| C    | -3.48367700  | 0.55639600  | -0.20535800 |
| C    | -4.34545900  | 1.49616300  | -0.80182200 |
| C    | -4.03074000  | -0.48907500 | 0.56110300  |
| C    | -5.71999700  | 1.39160700  | -0.63922700 |
| H    | -3.94247000  | 2.27061400  | -1.44980000 |
| C    | -5.40061600  | -0.56850900 | 0.75751700  |
| H    | -3.35745900  | -1.20849300 | 1.01345700  |
| C    | -6.27080800  | 0.35894600  | 0.14948900  |
| H    | -6.37982400  | 2.09204000  | -1.14075100 |
| H    | -5.80926600  | -1.36502900 | 1.37010700  |
| N    | -7.66560500  | 0.24010300  | 0.30023800  |
| C    | -8.49003800  | 1.39787100  | 0.32262200  |
| C    | -8.27036500  | -1.04558100 | 0.39595100  |
| C    | -8.13017200  | 2.51417000  | 1.09736100  |
| C    | -9.69155300  | 1.43113500  | -0.40168600 |
| C    | -7.87390300  | -2.08563800 | -0.45947400 |
| C    | -9.29156900  | -1.28116200 | 1.33089900  |
| C    | -8.94717200  | 3.63924700  | 1.13424200  |
| H    | -7.21381900  | 2.48471100  | 1.67924900  |
| C    | -10.50588200 | 2.56139100  | -0.36848700 |
| H    | -9.99116400  | 0.56142600  | -0.97869000 |
| C    | -8.45957300  | -3.34458300 | -0.35670800 |
| H    | -7.10143100  | -1.90499500 | -1.20098600 |
| C    | -9.90320700  | -2.52869800 | 1.40512700  |
| H    | -9.61052600  | -0.47714500 | 1.98737200  |
| C    | -10.13365700 | 3.69049800  | 0.38295000  |
| H    | -8.68184200  | 4.49445600  | 1.74908900  |
| H    | -11.44719300 | 2.55827200  | -0.91108300 |
| C    | -9.47468400  | -3.58736900 | 0.58681100  |

|    |              |             |             |
|----|--------------|-------------|-------------|
| H  | -8.15682600  | -4.13286800 | -1.04044200 |
| H  | -10.70294100 | -2.70942800 | 2.11731100  |
| C  | 6.73723500   | 0.61590800  | 0.10901100  |
| C  | 7.67813100   | 1.67285900  | 0.18793300  |
| C  | 7.18343400   | -0.72124600 | 0.15723100  |
| C  | 9.03364700   | 1.36735500  | 0.31053700  |
| O  | 7.17080500   | 2.93411200  | 0.13588800  |
| C  | 8.53807900   | -1.02499500 | 0.28124900  |
| H  | 6.43928000   | -1.50543800 | 0.09700300  |
| C  | 9.47946500   | 0.03332300  | 0.35832200  |
| H  | 9.77804800   | 2.15116200  | 0.37254700  |
| C  | 8.06236400   | 4.04952100  | 0.22484600  |
| O  | 9.04378100   | -2.28373200 | 0.33586500  |
| C  | 10.87094700  | -0.24437600 | 0.48440200  |
| H  | 8.61986400   | 4.00329000  | 1.17202000  |
| H  | 8.78565300   | 4.01274100  | -0.60324200 |
| C  | 7.22324900   | 5.31675300  | 0.15335800  |
| C  | 8.14746700   | -3.39939900 | 0.27420000  |
| C  | 12.05908300  | -0.45900800 | 0.59191600  |
| H  | 6.49063100   | 5.29960800  | 0.97110300  |
| H  | 6.65350500   | 5.30878600  | -0.78536200 |
| C  | 8.08074300   | 6.58598400  | 0.23945400  |
| H  | 7.43015400   | -3.34322700 | 1.10620300  |
| H  | 7.58366300   | -3.36857100 | -0.66991100 |
| C  | 8.98160500   | -4.66822700 | 0.36427600  |
| H  | 13.10259700  | -0.66151600 | 0.68720500  |
| H  | 8.81950400   | 6.58848500  | -0.57624400 |
| H  | 8.65740200   | 6.57891700  | 1.17672000  |
| C  | 7.25018300   | 7.87463200  | 0.16979000  |
| H  | 9.70953100   | -4.67023900 | -0.45761800 |
| H  | 9.55778400   | -4.64493900 | 1.29849700  |
| C  | 8.11502900   | -5.93317700 | 0.30774400  |
| H  | 6.51230100   | 7.87252900  | 0.98509800  |
| H  | 6.67403300   | 7.88214800  | -0.76685400 |
| C  | 8.10811000   | 9.14233000  | 0.25602000  |
| H  | 7.53230400   | -5.94084700 | -0.62575000 |
| H  | 7.38086400   | -5.91528600 | 1.12722700  |
| C  | 8.93815400   | -7.22529800 | 0.39770200  |
| H  | 8.83406000   | 9.18424800  | -0.56625200 |
| H  | 7.49161800   | 10.04758900 | 0.20415900  |
| H  | 8.67107500   | 9.17442900  | 1.19776100  |
| H  | 9.67147600   | -7.24378700 | -0.42155400 |
| H  | 9.51997800   | -7.21810500 | 1.33077500  |
| C  | 8.07134900   | -8.48869900 | 0.34138800  |
| H  | 7.50209200   | -8.53536400 | -0.59594800 |
| H  | 8.68238400   | -9.39687700 | 0.40746500  |
| H  | 7.34981300   | -8.50947500 | 1.16823900  |
| N  | -10.91977200 | 4.85955500  | 0.47464000  |
| N  | -10.12660800 | -4.83198200 | 0.71850000  |
| C  | -9.45639900  | -5.91332600 | 0.63945300  |
| H  | -9.98513000  | -6.86473800 | 0.70315900  |
| H  | -8.36400700  | -5.94830700 | 0.52253800  |
| C  | -11.52764900 | 5.30671000  | -0.55225500 |
| H  | -12.16002300 | 6.18852700  | -0.44606800 |
| H  | -11.44564900 | 4.86161900  | -1.55431000 |
| Co | -0.71472900  | -1.09029900 | -0.67751800 |
| Cl | -2.28949600  | -2.57987400 | -1.22279100 |
| Cl | -0.29919700  | -1.75193500 | 1.38939500  |
| C  | 0.47859200   | -2.12069900 | -1.63395700 |
| O  | 1.35254500   | -2.90037600 | -1.39117400 |

|   |             |             |             |
|---|-------------|-------------|-------------|
| C | 0.15416400  | -1.58449800 | -3.04585000 |
| H | -0.29386300 | -2.41071300 | -3.60513100 |
| H | -0.56974100 | -0.75806400 | -3.05850200 |
| H | 1.08811200  | -1.25303200 | -3.51132100 |

-----

Total electronic Energy ( $E_{\text{total}}$ ) = -3422.979772 (Hartree/Particle).

DFT-optimized geometry of **(11)**  $[\text{Co}^{\text{II}}(\eta^2\text{-COF-N}_2\text{N}')(\text{OCHCH}_3)\text{Cl}_2]$  (doublet) (\***OCHCH<sub>3</sub>**), computed at the UB3LYP-D3/ LANL2DZ (Co)/ 6-31+G\* (HCNOCl) level in absence of any solvent.

| Atom | x           | y           | z           |
|------|-------------|-------------|-------------|
| C    | -5.39003600 | 0.81723500  | -0.02094400 |
| C    | -4.18166000 | 0.96849900  | 0.00135600  |
| C    | -2.78132000 | 1.17262600  | 0.02594900  |
| C    | -2.21403500 | 2.46207900  | -0.04544000 |
| C    | -1.89173100 | 0.07766600  | 0.12524200  |
| C    | -0.83194700 | 2.59713200  | -0.04023500 |
| H    | -2.86220700 | 3.32977600  | -0.11758600 |
| N    | -0.57346600 | 0.21154800  | 0.15641400  |
| H    | -2.27828600 | -0.93550200 | 0.17170100  |
| C    | -0.03183700 | 1.44938600  | 0.05080000  |
| H    | -0.36840500 | 3.57646900  | -0.11845100 |
| C    | 1.41888000  | 1.50037000  | -0.02199400 |
| N    | 2.09230900  | 0.39873700  | -0.05375100 |
| H    | 1.91188800  | 2.47001800  | -0.09770400 |
| C    | 3.49988200  | 0.37547900  | -0.09180100 |
| C    | 4.28219500  | 1.32690000  | 0.58375200  |
| C    | 4.13224700  | -0.66050200 | -0.79824000 |
| C    | 5.66832700  | 1.25165600  | 0.54376500  |
| H    | 3.80571200  | 2.08039200  | 1.20429500  |
| C    | 5.51718200  | -0.72034700 | -0.85848200 |
| H    | 3.52024300  | -1.37935200 | -1.33455900 |
| C    | 6.30870600  | 0.22965800  | -0.18407900 |
| H    | 6.26539800  | 1.96618100  | 1.10115600  |
| H    | 5.99718700  | -1.50968600 | -1.42762500 |
| N    | 7.71653800  | 0.14393900  | -0.21439100 |
| C    | 8.50681100  | 1.32470300  | -0.22316700 |
| C    | 8.35536900  | -1.12659900 | -0.19569400 |
| C    | 8.16967100  | 2.40128800  | -1.06202400 |
| C    | 9.65163900  | 1.42376400  | 0.58278300  |
| C    | 7.90465600  | -2.13862600 | 0.66719500  |
| C    | 9.46389500  | -1.37751000 | -1.02140100 |
| C    | 8.95272900  | 3.55061000  | -1.08296100 |
| H    | 7.29796800  | 2.32255800  | -1.70470700 |
| C    | 10.43156500 | 2.57835900  | 0.56474400  |
| H    | 9.93506500  | 0.58620400  | 1.21303700  |
| C    | 8.52584500  | -3.38468900 | 0.67795000  |
| H    | 7.06610600  | -1.94314900 | 1.32902300  |
| C    | 10.10751600 | -2.61028300 | -0.98047400 |
| H    | 9.82447000  | -0.59538100 | -1.68271500 |
| C    | 10.08037000 | 3.66756300  | -0.25264900 |
| H    | 8.70539800  | 4.37483400  | -1.74578900 |
| H    | 11.33069000 | 2.62534200  | 1.17295200  |

|    |              |             |             |
|----|--------------|-------------|-------------|
| C  | 9.62960400   | -3.64261800 | -0.15586000 |
| H  | 8.18148700   | -4.14776900 | 1.37072100  |
| H  | 10.97375300  | -2.80116700 | -1.60713900 |
| C  | -6.79614900  | 0.64556000  | -0.05184800 |
| C  | -7.65269800  | 1.77523500  | -0.04951200 |
| C  | -7.35368500  | -0.64906600 | -0.08753300 |
| C  | -9.03387700  | 1.58213500  | -0.08007900 |
| O  | -7.04272100  | 2.99043400  | -0.01602800 |
| C  | -8.73412200  | -0.84030400 | -0.12049600 |
| H  | -6.67455900  | -1.49231700 | -0.09283800 |
| C  | -9.58993600  | 0.28981400  | -0.11543500 |
| H  | -9.71396000  | 2.42465400  | -0.07802300 |
| C  | -7.84389600  | 4.17569800  | -0.01905000 |
| O  | -9.34412900  | -2.05458800 | -0.15857800 |
| C  | -11.00493900 | 0.12711000  | -0.14699600 |
| H  | -8.47023400  | 4.19734600  | -0.92315600 |
| H  | -8.50606900  | 4.17759400  | 0.85949600  |
| C  | -6.89998800  | 5.36865900  | 0.01295100  |
| C  | -8.54218600  | -3.23826000 | -0.17848000 |
| C  | -12.21126000 | 0.01118300  | -0.17336600 |
| H  | -6.23360800  | 5.31279100  | -0.85797400 |
| H  | -6.26516600  | 5.29061900  | 0.90550900  |
| C  | -7.65340600  | 6.70504100  | 0.01623500  |
| H  | -7.88020400  | -3.22298300 | -1.05733700 |
| H  | -7.91468100  | -3.27583200 | 0.72498300  |
| C  | -9.48248200  | -4.43317500 | -0.23183300 |
| H  | -13.27211900 | -0.10268600 | -0.19764100 |
| H  | -8.32704400  | 6.74693200  | 0.88550900  |
| H  | -8.29640600  | 6.76855100  | -0.87463500 |
| C  | -6.71591300  | 7.91972200  | 0.04740500  |
| H  | -10.15250300 | -4.39257600 | 0.63683800  |
| H  | -10.11485500 | -4.34297500 | -1.12457700 |
| C  | -8.72316000  | -5.76609100 | -0.25332200 |
| H  | -6.04314400  | 7.87836100  | -0.82139700 |
| H  | -6.07334800  | 7.85657800  | 0.93753000  |
| C  | -7.46975200  | 9.25471600  | 0.05094400  |
| H  | -8.08463200  | -5.84208800 | 0.64016600  |
| H  | -8.04455700  | -5.79112000 | -1.11951800 |
| C  | -9.65486000  | -6.98431500 | -0.30964900 |
| H  | -8.12677500  | 9.33461500  | 0.92665000  |
| H  | -6.77807700  | 10.10519000 | 0.07330200  |
| H  | -8.09631400  | 9.35646800  | -0.84457400 |
| H  | -10.33345900 | -6.95963400 | 0.55515000  |
| H  | -10.29210600 | -6.90956100 | -1.20249100 |
| C  | -8.89484100  | -8.31566400 | -0.32993500 |
| H  | -8.27361300  | -8.42942400 | 0.56800500  |
| H  | -9.58242300  | -9.16880300 | -0.37067000 |
| H  | -8.23175900  | -8.37851500 | -1.20247700 |
| N  | 10.83444700  | 4.85862900  | -0.33172900 |
| N  | 10.32086500  | -4.87290300 | -0.16888700 |
| C  | 9.67583300   | -5.96900800 | -0.08451500 |
| H  | 10.23312300  | -6.90571100 | -0.05514900 |
| H  | 8.57877500   | -6.03202700 | -0.05172700 |
| C  | 11.35548500  | 5.35968400  | 0.71781600  |
| H  | 11.96580800  | 6.25830900  | 0.62387200  |
| H  | 11.21817400  | 4.94571900  | 1.72713400  |
| Co | 1.04236800   | -1.24661000 | 0.11460200  |
| Cl | 1.73089200   | -1.37081900 | 2.30827800  |
| Cl | 0.90435400   | -1.45599800 | -2.17282300 |
| O  | 0.10999900   | -3.01560800 | 0.28878900  |



|   |             |             |            |
|---|-------------|-------------|------------|
| C | -0.67514900 | -3.47247600 | 1.11073900 |
| H | -0.93199100 | -4.54162700 | 1.00988200 |
| C | -1.32038000 | -2.72726100 | 2.23162100 |
| H | -1.05400700 | -1.67123000 | 2.21923300 |
| H | -2.40819300 | -2.87737300 | 2.19009700 |
| H | -0.96868100 | -3.16063300 | 3.17762500 |

-----

Total electronic Energy ( $E_{\text{total}}$ ) = -3423.622222 (Hartree/Particle).

DFT-optimized geometry of **(11a)**  $[\text{Co}^{\text{II}}(\eta^2\text{-COF-N,N}')(\text{CH}_3)(\text{CHO})\text{Cl}_2]$  (doublet) ( $\text{OHC}^*\text{CH}_3$ ), computed at the UB3LYP-D3/ LANL2DZ (Co)/ 6-31+G\* (HCNOCl) level in absence of any solvent.

| Atom | x            | y           | z           |
|------|--------------|-------------|-------------|
| C    | 5.38132600   | 0.89036400  | -0.05278600 |
| C    | 4.17720900   | 1.06073900  | -0.11800300 |
| C    | 2.77890900   | 1.25664100  | -0.19091500 |
| C    | 2.19370400   | 2.53730000  | -0.14088700 |
| C    | 1.91573900   | 0.14470400  | -0.32101700 |
| C    | 0.81149600   | 2.64916500  | -0.19805400 |
| H    | 2.82480100   | 3.41538200  | -0.04741700 |
| N    | 0.59283400   | 0.26022400  | -0.39286300 |
| H    | 2.31279800   | -0.86266900 | -0.35647900 |
| C    | 0.02509600   | 1.49583800  | -0.31395500 |
| H    | 0.32869800   | 3.62029200  | -0.14167100 |
| C    | -1.42503400  | 1.54207200  | -0.27779700 |
| N    | -2.09024800  | 0.43739400  | -0.28738600 |
| H    | -1.91108800  | 2.51454100  | -0.16184800 |
| C    | -3.49108500  | 0.42644300  | -0.18894100 |
| C    | -4.30390500  | 1.36162900  | -0.85327200 |
| C    | -4.08866100  | -0.56618800 | 0.60698400  |
| C    | -5.68680400  | 1.30318200  | -0.73080800 |
| H    | -3.85553200  | 2.09312300  | -1.52107800 |
| C    | -5.46621800  | -0.59674400 | 0.76206500  |
| H    | -3.45104500  | -1.27913100 | 1.11671300  |
| C    | -6.28962000  | 0.32501700  | 0.08495900  |
| H    | -6.30996900  | 1.99926400  | -1.28289500 |
| H    | -5.91788500  | -1.35077500 | 1.39810100  |
| N    | -7.69336200  | 0.25236200  | 0.20013100  |
| C    | -8.47838900  | 1.43624900  | 0.17405300  |
| C    | -8.33800400  | -1.01227100 | 0.29847900  |
| C    | -8.09593200  | 2.56120200  | 0.92547300  |
| C    | -9.66255000  | 1.49178200  | -0.57748300 |
| C    | -7.93566500  | -2.08349900 | -0.51533000 |
| C    | -9.40353300  | -1.19881100 | 1.19474000  |
| C    | -8.87335100  | 3.71445600  | 0.91374800  |
| H    | -7.19318200  | 2.51677700  | 1.52729200  |
| C    | -10.43703500 | 2.65005700  | -0.59270800 |
| H    | -9.98059200  | 0.61780200  | -1.13789000 |
| C    | -8.56079300  | -3.32304300 | -0.40950600 |
| H    | -7.12877500  | -1.94154500 | -1.22803200 |
| C    | -10.05282500 | -2.42698900 | 1.27053000  |
| H    | -9.72677500  | -0.37157700 | 1.81947300  |
| C    | -10.04138400 | 3.78621500  | 0.13571300  |

|    |              |             |             |
|----|--------------|-------------|-------------|
| H  | -8.59062100  | 4.57692500  | 1.51048100  |
| H  | -11.36602400 | 2.66418800  | -1.15601500 |
| C  | -9.62118500  | -3.51612100 | 0.49491400  |
| H  | -8.25263400  | -4.13449200 | -1.06314400 |
| H  | -10.88626300 | -2.56895800 | 1.95224400  |
| Co | -0.72178200  | -1.27240800 | -0.59849100 |
| C  | 6.77704200   | 0.66521800  | 0.02607000  |
| C  | 7.67881100   | 1.75621300  | 0.09985400  |
| C  | 7.27578100   | -0.65398500 | 0.03384600  |
| C  | 9.04815200   | 1.50157900  | 0.17682700  |
| O  | 7.12216000   | 2.99736000  | 0.08897700  |
| C  | 8.64420000   | -0.90681900 | 0.11268700  |
| H  | 6.56072800   | -1.46524100 | -0.02039200 |
| C  | 9.54623300   | 0.18533500  | 0.18425800  |
| H  | 9.76330700   | 2.31257200  | 0.23334800  |
| C  | 7.97210600   | 4.14501900  | 0.17480100  |
| O  | 9.19957600   | -2.14611100 | 0.12735100  |
| C  | 10.95051900  | -0.04031800 | 0.26445400  |
| H  | 8.55935700   | 4.10226500  | 1.10400500  |
| H  | 8.67090300   | 4.15297400  | -0.67482400 |
| C  | 7.08246300   | 5.37921100  | 0.15443100  |
| C  | 8.34592500   | -3.29405600 | 0.06899300  |
| C  | 12.14871300  | -0.21034100 | 0.33324700  |
| H  | 6.37594400   | 5.31680400  | 0.99268200  |
| H  | 6.48552500   | 5.36723300  | -0.76717000 |
| C  | 7.89189000   | 6.67950100  | 0.24216200  |
| H  | 7.65115700   | -3.28194000 | 0.92179700  |
| H  | 7.75411600   | -3.26793900 | -0.85812100 |
| C  | 9.23094900   | -4.53064600 | 0.11020700  |
| H  | 13.20171800  | -0.37306300 | 0.39412100  |
| H  | 8.60526200   | 6.72754700  | -0.59446200 |
| H  | 8.49615100   | 6.67674700  | 1.16191000  |
| C  | 7.00978100   | 7.93523100  | 0.22380500  |
| H  | 9.93522400   | -4.48769500 | -0.73091300 |
| H  | 9.83162400   | -4.50285600 | 1.02870900  |
| C  | 8.41355200   | -5.82771700 | 0.05101400  |
| H  | 6.29708500   | 7.88745500  | 1.05985200  |
| H  | 6.40620900   | 7.93854300  | -0.69541400 |
| C  | 7.81955700   | 9.23407300  | 0.31204800  |
| H  | 7.80628500   | -5.84042000 | -0.86677100 |
| H  | 7.70208400   | -5.85497100 | 0.89012700  |
| C  | 9.28878400   | -7.08767500 | 0.09239300  |
| H  | 8.51863700   | 9.32125800  | -0.52972700 |
| H  | 7.16679000   | 10.11493000 | 0.29708700  |
| H  | 8.40846500   | 9.26974100  | 1.23766400  |
| H  | 9.99969600   | -7.06084400 | -0.74609400 |
| H  | 9.89499100   | -7.07568500 | 1.00969900  |
| C  | 8.47115000   | -8.38327300 | 0.03279700  |
| H  | 7.87919300   | -8.43433900 | -0.89020700 |
| H  | 9.11890000   | -9.26752000 | 0.06406700  |
| H  | 7.77370000   | -8.44906300 | 0.87782500  |
| N  | -10.78666100 | 4.98459600  | 0.17819900  |
| N  | -10.31402700 | -4.73845800 | 0.62716200  |
| C  | -9.67529200  | -5.84093200 | 0.59021200  |
| H  | -10.23493700 | -6.77456000 | 0.65328700  |
| H  | -8.58119600  | -5.91140500 | 0.51058600  |
| C  | -11.36148900 | 5.42131600  | -0.87202400 |
| H  | -11.96330600 | 6.32790400  | -0.80326300 |
| H  | -11.27953300 | 4.94326900  | -1.85878800 |
| Cl | -2.40684700  | -2.67626200 | -1.16242100 |

|    |             |             |             |
|----|-------------|-------------|-------------|
| Cl | -0.61855500 | -1.66927000 | 1.77419200  |
| C  | 0.48575200  | -2.86281500 | -0.17671000 |
| H  | -0.19731600 | -3.71614600 | -0.06707100 |
| O  | 1.67633300  | -2.87093900 | -0.14639200 |
| C  | 0.08515200  | -1.68797700 | -2.37742200 |
| H  | -0.08704000 | -2.70729600 | -2.71970000 |
| H  | -0.54549400 | -0.99041900 | -2.94458600 |
| H  | 1.13807200  | -1.40643000 | -2.40300400 |

-----

Total electronic Energy ( $E_{\text{total}}$ ) = -3423.550377 (Hartree/Particle).

DFT-optimized geometry of **(12)**  $[\text{Co}^{\text{II}}(\eta^2\text{-COF-N,N}')(\text{OCH}_2\text{CH}_3)\text{Cl}_2]$  (singlet) (\* $\text{OCH}_2\text{CH}_3$ ), computed at the B3LYP-D3/ LANL2DZ (Co)/ 6-31+G\* (HCNOCl) level in absence of any solvent.

| Atom | x            | y           | z           |
|------|--------------|-------------|-------------|
| C    | 5.34339700   | 0.96930800  | -0.02771400 |
| C    | 4.14240800   | 1.17101000  | -0.04875600 |
| C    | 2.74547100   | 1.38580700  | -0.07691000 |
| C    | 2.17788200   | 2.67660100  | -0.02476300 |
| C    | 1.86431100   | 0.28260600  | -0.15905700 |
| C    | 0.79544300   | 2.81963000  | -0.05150000 |
| H    | 2.82669600   | 3.54429600  | 0.04097700  |
| N    | 0.54875800   | 0.43821600  | -0.19253100 |
| H    | 2.20474300   | -0.74618200 | -0.21016700 |
| C    | -0.00557800  | 1.67510900  | -0.13207400 |
| H    | 0.33358200   | 3.80123700  | -0.00395700 |
| C    | -1.45321700  | 1.67712300  | -0.10723300 |
| N    | -2.06896400  | 0.53789400  | -0.12844200 |
| H    | -1.99231100  | 2.62032900  | -0.00981400 |
| C    | -3.47858200  | 0.49529100  | -0.07736300 |
| C    | -4.26724300  | 1.36542700  | -0.84756400 |
| C    | -4.10082800  | -0.44144800 | 0.76417700  |
| C    | -5.65418200  | 1.29899100  | -0.78499700 |
| H    | -3.79379100  | 2.04742800  | -1.54935600 |
| C    | -5.48382900  | -0.47988300 | 0.85472100  |
| H    | -3.48331600  | -1.10538000 | 1.35665500  |
| C    | -6.28449600  | 0.37573900  | 0.07162700  |
| H    | -6.25652200  | 1.94309700  | -1.41726900 |
| H    | -5.95712600  | -1.19074500 | 1.52383500  |
| N    | -7.69090400  | 0.28907200  | 0.12513000  |
| C    | -8.48846800  | 1.45455700  | -0.03127800 |
| C    | -8.32339400  | -0.97591000 | 0.28212400  |
| C    | -8.16058700  | 2.63817300  | 0.65273300  |
| C    | -9.63131200  | 1.43475800  | -0.84579200 |
| C    | -7.86403200  | -2.09670000 | -0.42823100 |
| C    | -9.43341500  | -1.11409000 | 1.13192700  |
| C    | -8.95026700  | 3.77465700  | 0.51397100  |
| H    | -7.29073800  | 2.65302000  | 1.30257700  |
| C    | -10.41798800 | 2.57606700  | -0.98833300 |
| H    | -9.90813000  | 0.51658000  | -1.35505200 |
| C    | -8.47870900  | -3.33525700 | -0.26496000 |
| H    | -7.02167500  | -1.99409400 | -1.10580100 |
| C    | -10.07046300 | -2.34399600 | 1.26325800  |

|   |              |             |             |
|---|--------------|-------------|-------------|
| H | -9.80052400  | -0.24887800 | 1.67575700  |
| C | -10.07580000 | 3.76940800  | -0.32745000 |
| H | -8.71047300  | 4.68355500  | 1.05828700  |
| H | -11.31560200 | 2.53337400  | -1.59905200 |
| C | -9.58400500  | -3.47940100 | 0.59366300  |
| H | -8.12555300  | -4.18677300 | -0.84013300 |
| H | -10.93786200 | -2.44964500 | 1.90821500  |
| C | 6.73259800   | 0.69718900  | -0.00243700 |
| C | 7.67506900   | 1.75315900  | 0.07064200  |
| C | 7.18381400   | -0.63831700 | -0.04957500 |
| C | 9.03620000   | 1.44809100  | 0.09411300  |
| O | 7.16375200   | 3.01276100  | 0.11294800  |
| C | 8.54380700   | -0.94165000 | -0.02541500 |
| H | 6.43856000   | -1.42181800 | -0.10428000 |
| C | 9.48655700   | 0.11553700  | 0.04713100  |
| H | 9.78163400   | 2.23142200  | 0.14946700  |
| C | 8.05742100   | 4.12723300  | 0.19387000  |
| O | 9.05342200   | -2.19999200 | -0.06663900 |
| C | 10.88362900  | -0.16161200 | 0.07305000  |
| H | 8.67403200   | 4.04221200  | 1.10088800  |
| H | 8.72660700   | 4.12950800  | -0.67927500 |
| C | 7.21334400   | 5.39260700  | 0.23100900  |
| C | 8.15572600   | -3.31310000 | -0.13656400 |
| C | 12.07648600  | -0.37573300 | 0.09620800  |
| H | 6.53399300   | 5.33680200  | 1.09185900  |
| H | 6.58529600   | 5.42276400  | -0.66923000 |
| C | 8.07254000   | 6.66063500  | 0.31788300  |
| H | 7.48867900   | -3.30551300 | 0.73825400  |
| H | 7.53683400   | -3.23247500 | -1.04259700 |
| C | 8.99292300   | -4.58280600 | -0.16591600 |
| H | 13.12434700  | -0.57722100 | 0.11633300  |
| H | 8.75843800   | 6.70147700  | -0.54178500 |
| H | 8.70712300   | 6.61576000  | 1.21587600  |
| C | 7.23711600   | 7.94745000  | 0.35631000  |
| H | 9.67145900   | -4.53751300 | -1.02775600 |
| H | 9.62276700   | -4.61008800 | 0.73283500  |
| C | 8.12333800   | -5.84467400 | -0.24197000 |
| H | 6.55204200   | 7.90708200  | 1.21551400  |
| H | 6.60310800   | 7.99269800  | -0.54104000 |
| C | 8.09671500   | 9.21397500  | 0.44305500  |
| H | 7.48765500   | -5.80207200 | -1.13934000 |
| H | 7.43775500   | -5.87359500 | 0.61841700  |
| C | 8.94851800   | -7.13829400 | -0.27115800 |
| H | 8.76930400   | 9.29435400  | -0.42069100 |
| H | 7.47668800   | 10.11792300 | 0.46918100  |
| H | 8.71787900   | 9.20804900  | 1.34803300  |
| H | 9.63319700   | -7.11011100 | -1.13112000 |
| H | 9.58323700   | -7.18151200 | 0.62569000  |
| C | 8.07828200   | -8.39828800 | -0.34705800 |
| H | 7.45595200   | -8.39432200 | -1.25127200 |
| H | 8.69086700   | -9.30756000 | -0.36660900 |
| H | 7.40576100   | -8.46617700 | 0.51779400  |
| N | -10.83709600 | 4.95527000  | -0.41409900 |
| N | -10.26807500 | -4.69989600 | 0.77823600  |
| C | -9.61510100  | -5.79194300 | 0.85488100  |
| H | -10.16610500 | -6.72732100 | 0.95634900  |
| H | -8.51757600  | -5.85075000 | 0.83759100  |
| C | -11.35873300 | 5.30412600  | -1.52329200 |
| H | -11.97468400 | 6.20325600  | -1.55454300 |
| H | -11.21673300 | 4.75628100  | -2.46595900 |

|    |             |             |             |
|----|-------------|-------------|-------------|
| Co | -0.76174500 | -1.04705000 | -0.28950700 |
| Cl | -2.33618800 | -2.49450500 | -0.89014600 |
| Cl | -0.73207000 | -1.33635100 | 1.90481600  |
| O  | 0.59463100  | -2.10620600 | -0.76621700 |
| C  | 0.59731300  | -3.51140500 | -0.63222900 |
| H  | 0.04571700  | -3.79457900 | 0.27433900  |
| H  | 0.07190200  | -3.96809700 | -1.48341100 |
| C  | 2.04430200  | -3.99652700 | -0.55510500 |
| H  | 2.07974600  | -5.09168600 | -0.48505800 |
| H  | 2.60181300  | -3.68945400 | -1.44866600 |
| H  | 2.54204100  | -3.57585600 | 0.32709000  |

-----

Total electronic Energy ( $E_{\text{total}}$ ) = -3424.193311 (Hartree/Particle).

DFT-optimized geometry of **(12a)**  $[\text{Co}^{\text{II}}(\eta^2\text{-COF-N,N}')(\text{CH}(\text{OH})\text{CH}_3)\text{Cl}_2]$  (singlet) ( $^*\text{CH}(\text{OH})\text{CH}_3$ ), computed at the B3LYP-D3/ LANL2DZ (Co)/ 6-31+G\* (HCNOCl) level in absence of any solvent.

| Atom | x            | y           | z           |
|------|--------------|-------------|-------------|
| C    | 5.39936900   | 0.90073600  | -0.01765100 |
| C    | 4.19182900   | 1.05785500  | -0.03975500 |
| C    | 2.79114300   | 1.25220000  | -0.06940500 |
| C    | 2.20749500   | 2.53485300  | -0.07705600 |
| C    | 1.92116800   | 0.14128700  | -0.09275800 |
| C    | 0.82537000   | 2.64164400  | -0.10183500 |
| H    | 2.84050100   | 3.41633100  | -0.05909500 |
| N    | 0.59297000   | 0.24098400  | -0.12716700 |
| H    | 2.33596500   | -0.85766300 | -0.08034600 |
| C    | 0.03194400   | 1.48600500  | -0.12356900 |
| H    | 0.34328200   | 3.61470200  | -0.09944400 |
| C    | -1.41749600  | 1.55876300  | -0.10573000 |
| N    | -2.09644900  | 0.46440000  | -0.10010800 |
| H    | -1.88201200  | 2.54667300  | -0.04010800 |
| C    | -3.49596900  | 0.46065600  | -0.05733200 |
| C    | -4.28519700  | 1.43415200  | -0.69818900 |
| C    | -4.12943400  | -0.57894800 | 0.64755600  |
| C    | -5.67079100  | 1.37089200  | -0.63635800 |
| H    | -3.81460500  | 2.20194700  | -1.30699200 |
| C    | -5.51156900  | -0.61862100 | 0.74351900  |
| H    | -3.51421000  | -1.32366500 | 1.13823200  |
| C    | -6.30733800  | 0.34514100  | 0.09236500  |
| H    | -6.27118900  | 2.09860600  | -1.17268100 |
| H    | -5.98795900  | -1.41169300 | 1.31015800  |
| N    | -7.71349300  | 0.26697400  | 0.14173100  |
| C    | -8.50047900  | 1.45000000  | 0.14520100  |
| C    | -8.35973700  | -1.00120700 | 0.14580600  |
| C    | -8.15518100  | 2.53294200  | 0.97244700  |
| C    | -9.65121200  | 1.54408800  | -0.65288900 |
| C    | -7.92674500  | -2.02482700 | -0.71212800 |
| C    | -9.45670300  | -1.23651600 | 0.99095400  |
| C    | -8.93594800  | 3.68386900  | 0.98945900  |
| H    | -7.27923800  | 2.45728300  | 1.60970800  |
| C    | -10.42879800 | 2.70026100  | -0.63904600 |
| H    | -9.94113400  | 0.70119000  | -1.27296800 |

|   |              |             |             |
|---|--------------|-------------|-------------|
| C | -8.55409600  | -3.26767800 | -0.69935000 |
| H | -7.09448400  | -1.84351000 | -1.38566600 |
| C | -10.10689700 | -2.46648900 | 0.97394300  |
| H | -9.80313600  | -0.44520300 | 1.64893600  |
| C | -10.06942100 | 3.79580800  | 0.16636300  |
| H | -8.68272500  | 4.51310100  | 1.64376500  |
| H | -11.33261000 | 2.74359000  | -1.24051900 |
| C | -9.64615900  | -3.51035200 | 0.15407200  |
| H | -8.22157800  | -4.04129500 | -1.38604300 |
| H | -10.96434600 | -2.64601900 | 1.61585300  |
| C | 6.80176400   | 0.70514300  | 0.01112400  |
| C | 7.67966600   | 1.81787200  | 0.02462600  |
| C | 7.33205100   | -0.60158100 | 0.02724600  |
| C | 9.05668100   | 1.59647900  | 0.05321500  |
| O | 7.09364400   | 3.04520800  | 0.00791800  |
| C | 8.70819400   | -0.82113600 | 0.05645300  |
| H | 6.63588700   | -1.43077400 | 0.01766300  |
| C | 9.58605400   | 0.29273200  | 0.06934300  |
| H | 9.75382800   | 2.42484800  | 0.06398300  |
| C | 7.91871800   | 4.21417400  | 0.02861600  |
| O | 9.29346200   | -2.04658100 | 0.07407700  |
| C | 10.99734600  | 0.10112600  | 0.09866400  |
| H | 8.54271800   | 4.21080500  | 0.93451300  |
| H | 8.58311900   | 4.21411900  | -0.84813500 |
| C | 6.99954700   | 5.42653000  | 0.01008000  |
| C | 8.46726500   | -3.21545000 | 0.06581000  |
| C | 12.20096900  | -0.03988000 | 0.12356500  |
| H | 6.32782300   | 5.37148500  | 0.87698200  |
| H | 6.36784400   | 5.37508600  | -0.88666800 |
| C | 7.78028300   | 6.74702400  | 0.03047900  |
| H | 7.80529700   | -3.20655900 | 0.94457100  |
| H | 7.84032300   | -3.21860100 | -0.83840200 |
| C | 9.38320800   | -4.42975200 | 0.09184600  |
| H | 13.25917800  | -0.17683200 | 0.14598000  |
| H | 8.45945100   | 6.78776300  | -0.83449400 |
| H | 8.41944900   | 6.78405500  | 0.92554800  |
| C | 6.86816700   | 7.98114100  | 0.01243000  |
| H | 10.05336400  | -4.38358100 | -0.77647300 |
| H | 10.01777700  | -4.37254300 | 0.98583700  |
| C | 8.59622000   | -5.74681000 | 0.08423000  |
| H | 6.18966500   | 7.94072700  | 0.87683800  |
| H | 6.22966100   | 7.94460700  | -0.88213700 |
| C | 7.64933400   | 9.30017100  | 0.03312900  |
| H | 7.95447400   | -5.78894500 | -0.80890900 |
| H | 7.91873300   | -5.77779600 | 0.95098100  |
| C | 9.50298800   | -6.98471100 | 0.11041900  |
| H | 8.31298500   | 9.37950900  | -0.83758300 |
| H | 6.97546000   | 10.16498500 | 0.01971000  |
| H | 8.27255700   | 9.37557900  | 0.93354000  |
| H | 10.17986700  | -6.95428900 | -0.75561500 |
| H | 10.14386800  | -6.94337000 | 1.00295800  |
| C | 8.71559900   | -8.30020600 | 0.10251300  |
| H | 8.08966600   | -8.38035700 | -0.79563200 |
| H | 9.38564000   | -9.16798200 | 0.12165500  |
| H | 8.05342100   | -8.36927200 | 0.97520100  |
| N | -10.82085100 | 4.98871500  | 0.24124300  |
| N | -10.34187400 | -4.73762700 | 0.19180700  |
| C | -9.70049900  | -5.83665700 | 0.11706800  |
| H | -10.26072100 | -6.77200700 | 0.10680600  |
| H | -8.60412700  | -5.90320200 | 0.07430500  |

|    |              |             |             |
|----|--------------|-------------|-------------|
| C  | -11.34995200 | 5.48156000  | -0.80816200 |
| H  | -11.95814700 | 6.38187700  | -0.71681400 |
| H  | -11.22186000 | 5.05867200  | -1.81498700 |
| Co | -0.73834300  | -1.26535900 | -0.23805000 |
| Cl | -2.28834900  | -2.47048600 | -1.25947800 |
| Cl | -0.78603900  | -1.56870500 | 1.97772100  |
| C  | 0.59676300   | -2.71458500 | -0.39663900 |
| H  | 1.37811900   | -2.36653900 | 0.29339300  |
| C  | 1.04585900   | -2.77599100 | -1.84198500 |
| H  | 1.90389100   | -3.45765300 | -1.94345900 |
| H  | 0.23036500   | -3.14711600 | -2.46723100 |
| H  | 1.35218800   | -1.78957900 | -2.21133200 |
| O  | 0.13604200   | -3.96142900 | 0.00630400  |
| H  | -0.22196600  | -3.86448600 | 0.90669000  |

-----

Total electronic Energy ( $E_{\text{total}}$ ) = -3424.172416 (Hartree/Particle).

DFT-optimized geometry of **(13)**  $[\text{Co}^{\text{II}}(\eta^2\text{-COF-N,N})(\text{HOCH}_2\text{CH}_3)\text{Cl}_2]$  (doublet) (\* $\text{HOCH}_2\text{CH}_3$ ), computed at the UB3LYP-D3/ LANL2DZ (Co)/ 6-31+G\* (HCNOCl) level in absence of any solvent.

| Atom | x           | y           | z           |
|------|-------------|-------------|-------------|
| C    | 5.38464700  | 0.90794800  | -0.03055100 |
| C    | 4.17888800  | 1.07820400  | -0.00555100 |
| C    | 2.78093200  | 1.29499100  | 0.02329100  |
| C    | 2.22937200  | 2.59261200  | 0.08073100  |
| C    | 1.87971400  | 0.20406600  | -0.00446000 |
| C    | 0.84882000  | 2.74941000  | 0.11244000  |
| H    | 2.89012600  | 3.45351100  | 0.10423600  |
| N    | 0.56548000  | 0.36467800  | 0.01790400  |
| H    | 2.23402400  | -0.82157200 | -0.04137700 |
| C    | 0.03508100  | 1.60936900  | 0.08208200  |
| H    | 0.40131300  | 3.73784200  | 0.16525600  |
| C    | -1.41656300 | 1.65501200  | 0.13501700  |
| N    | -2.08076200 | 0.54465800  | 0.16873600  |
| H    | -1.92043200 | 2.62126400  | 0.16957700  |
| C    | -3.48773100 | 0.50440800  | 0.14259500  |
| C    | -4.25079300 | 1.44259000  | -0.57366600 |
| C    | -4.14148400 | -0.53678500 | 0.82192000  |
| C    | -5.63610900 | 1.35000300  | -0.59878600 |
| H    | -3.75701200 | 2.20187000  | -1.17337800 |
| C    | -5.52666600 | -0.61482100 | 0.81667500  |
| H    | -3.54741300 | -1.24451800 | 1.39152400  |
| C    | -6.29788700 | 0.32250400  | 0.10199600  |
| H    | -6.21485500 | 2.05550300  | -1.18616400 |
| H    | -6.02297000 | -1.40814500 | 1.36595100  |
| N    | -7.70379100 | 0.21966600  | 0.06681100  |
| C    | -8.50794000 | 1.39099800  | 0.02964800  |
| C    | -8.32658500 | -1.05846200 | 0.02720200  |
| C    | -8.22559100 | 2.47563300  | 0.87814100  |
| C    | -9.61243400 | 1.47153600  | -0.83243600 |
| C    | -7.82641200 | -2.06973900 | -0.80886900 |
| C    | -9.46876500 | -1.31713000 | 0.80305400  |
| C    | -9.02246500 | 3.61537000  | 0.85391600  |

|   |              |             |             |
|---|--------------|-------------|-------------|
| H | -7.38582800  | 2.41079700  | 1.56351400  |
| C | -10.40622100 | 2.61652900  | -0.85941200 |
| H | -9.85418700  | 0.62732100  | -1.47113200 |
| C | -8.43363500  | -3.32232800 | -0.84159400 |
| H | -6.96121900  | -1.86817300 | -1.43356400 |
| C | -10.09695600 | -2.55687900 | 0.73941800  |
| H | -9.86747600  | -0.53548800 | 1.44269400  |
| C | -10.10898200 | 3.71400000  | -0.03178000 |
| H | -8.81821900  | 4.44591200  | 1.52347300  |
| H | -11.27470200 | 2.64957600  | -1.51146500 |
| C | -9.57156200  | -3.58789800 | -0.05753100 |
| H | -8.05084600  | -4.08462300 | -1.51479600 |
| H | -10.98903400 | -2.75386700 | 1.32668500  |
| C | 6.78579100   | 0.70067900  | -0.05733700 |
| C | 7.67365300   | 1.80579800  | -0.05414400 |
| C | 7.30671300   | -0.60928900 | -0.08640000 |
| C | 9.04890400   | 1.57384400  | -0.08048700 |
| O | 7.09793700   | 3.03786300  | -0.02506700 |
| C | 8.68126300   | -0.83956300 | -0.11201600 |
| H | 6.60366800   | -1.43269100 | -0.08727300 |
| C | 9.56846500   | 0.26613000  | -0.10947900 |
| H | 9.75251900   | 2.39683100  | -0.07902900 |
| C | 7.93245800   | 4.19956400  | -0.01675100 |
| O | 9.25646400   | -2.07094900 | -0.13973800 |
| C | 10.97843600  | 0.06366700  | -0.13556100 |
| H | 8.59080900   | 4.17677700  | 0.86436000  |
| H | 8.56306400   | 4.20952700  | -0.91819000 |
| C | 7.02293200   | 5.41885200  | 0.01981700  |
| C | 8.42021000   | -3.23115500 | -0.13798000 |
| C | 12.18114300  | -0.08612300 | -0.15745900 |
| H | 6.38473200   | 5.35448300  | 0.91102100  |
| H | 6.35652900   | 5.38633200  | -0.85230000 |
| C | 7.81420800   | 6.73311100  | 0.03089600  |
| H | 7.79087200   | -3.23289100 | 0.76469500  |
| H | 7.75994500   | -3.21342300 | -1.01815800 |
| C | 9.32509300   | -4.45387700 | -0.16702000 |
| H | 13.23840900  | -0.23017000 | -0.17667900 |
| H | 8.46001600   | 6.78277900  | -0.85885900 |
| H | 8.48757500   | 6.75131800  | 0.90118300  |
| C | 6.91181000   | 7.97394200  | 0.06720700  |
| H | 9.96280300   | -4.39854300 | -1.05888400 |
| H | 9.99315200   | -4.41766900 | 0.70333400  |
| C | 8.52641700   | -5.76380500 | -0.16741600 |
| H | 6.26666300   | 7.92473000  | 0.95632000  |
| H | 6.23912600   | 7.95615300  | -0.80249500 |
| C | 7.70346600   | 9.28683000  | 0.07829500  |
| H | 7.85170500   | -5.78507500 | -1.03681700 |
| H | 7.88129600   | -5.80356800 | 0.72350700  |
| C | 9.42156000   | -7.01007000 | -0.19550800 |
| H | 8.33382100   | 9.37512800  | -0.81601500 |
| H | 7.03638800   | 10.15665300 | 0.10428200  |
| H | 8.36144000   | 9.34346500  | 0.95509000  |
| H | 10.06603200  | -6.97115400 | -1.08551300 |
| H | 10.09550400  | -6.98953200 | 0.67300700  |
| C | 8.62209500   | -8.31829700 | -0.19574000 |
| H | 7.96257300   | -8.37774400 | -1.07127800 |
| H | 9.28396600   | -9.19229400 | -0.21596600 |
| H | 7.99232900   | -8.39621100 | 0.70001200  |
| N | -10.88091800 | 4.89562300  | 0.00323400  |
| N | -10.25094700 | -4.82469400 | -0.07053600 |



|    |              |             |             |
|----|--------------|-------------|-------------|
| C  | -9.59302300  | -5.91509800 | -0.12205700 |
| H  | -10.13993200 | -6.85696000 | -0.17285700 |
| H  | -8.49502200  | -5.96817900 | -0.10589000 |
| C  | -11.35197900 | 5.38675700  | -1.07420600 |
| H  | -11.97761700 | 6.27782800  | -1.01604100 |
| H  | -11.15626000 | 4.97133100  | -2.07323300 |
| Co | -0.97094100  | -1.07570700 | 0.12349500  |
| Cl | -1.56026800  | -1.48888300 | -2.08035800 |
| Cl | -1.00967700  | -1.27428400 | 2.42168100  |
| O  | 0.28541200   | -2.64973000 | -0.13039400 |
| C  | 0.10097800   | -3.88196200 | 0.61723800  |
| H  | 0.17993900   | -3.58413900 | 1.66203900  |
| H  | -0.91736300  | -4.24949000 | 0.44071800  |
| C  | 1.15193700   | -4.90581900 | 0.21883300  |
| H  | 1.02542700   | -5.81952200 | 0.81224900  |
| H  | 1.06660600   | -5.17768500 | -0.84091800 |
| H  | 2.15931000   | -4.51342000 | 0.39703700  |
| H  | 0.09003600   | -2.81079000 | -1.07910000 |

-----  
Total electronic Energy ( $E_{\text{total}}$ ) = -3424.845277 (Hartree/Particle).

DFT-optimized geometry of **(14)**  $[\text{Co}^{\text{II}}(\eta^2\text{-COF-N,N}')(\text{CH}_2\text{CH}_3)\text{Cl}_2]$  (singlet) (\* $\text{CH}_2\text{CH}_3$ ), computed at the B3LYP-D3/ LANL2DZ (Co)/ 6-31+G\* (HCNOCl) level in absence of any solvent.

| Atom | x           | y           | z           |
|------|-------------|-------------|-------------|
| C    | 5.38709300  | 0.81830900  | -0.02672700 |
| C    | 4.18204700  | 0.98186800  | -0.09279900 |
| C    | 2.78468000  | 1.18689800  | -0.17019300 |
| C    | 2.21362100  | 2.47545600  | -0.18527800 |
| C    | 1.90702900  | 0.08319300  | -0.23791700 |
| C    | 0.83326000  | 2.59903800  | -0.24454100 |
| H    | 2.85514300  | 3.34978000  | -0.13991700 |
| N    | 0.58378400  | 0.20314800  | -0.31819100 |
| H    | 2.30188300  | -0.92309800 | -0.22520100 |
| C    | 0.03219500  | 1.45062400  | -0.29933600 |
| H    | 0.36121700  | 3.57698600  | -0.23720800 |
| C    | -1.41735800 | 1.51794800  | -0.26763300 |
| N    | -2.08694400 | 0.41650700  | -0.24296300 |
| H    | -1.88987200 | 2.50070800  | -0.18859800 |
| C    | -3.48525600 | 0.40317600  | -0.15093300 |
| C    | -4.30340200 | 1.35878600  | -0.78095000 |
| C    | -4.08232000 | -0.62487900 | 0.60060300  |
| C    | -5.68536400 | 1.28845500  | -0.66446900 |
| H    | -3.86040300 | 2.11680300  | -1.42199400 |
| C    | -5.45965800 | -0.66988200 | 0.75089800  |
| H    | -3.44224200 | -1.35596600 | 1.08077500  |
| C    | -6.28601100 | 0.27480900  | 0.11004500  |
| H    | -6.31095500 | 2.00112700  | -1.19209800 |
| H    | -5.90866800 | -1.45307000 | 1.35255800  |
| N    | -7.68902500 | 0.18989200  | 0.21546000  |
| C    | -8.48213800 | 1.36872200  | 0.22602700  |
| C    | -8.32687900 | -1.08125000 | 0.26901900  |
| C    | -8.11190700 | 2.46928600  | 1.01851200  |

|   |              |             |             |
|---|--------------|-------------|-------------|
| C | -9.66266500  | 1.44179500  | -0.52965700 |
| C | -7.91829300  | -2.12063800 | -0.58196800 |
| C | -9.39184000  | -1.30459800 | 1.15734300  |
| C | -8.89778200  | 3.61660200  | 1.04279300  |
| H | -7.21213600  | 2.41019000  | 1.62351200  |
| C | -10.44551200 | 2.59431400  | -0.50880900 |
| H | -9.97110100  | 0.58561100  | -1.12198400 |
| C | -8.53703300  | -3.36633600 | -0.52055000 |
| H | -7.11140900  | -1.94942000 | -1.28821900 |
| C | -10.03464200 | -2.53813700 | 1.18933500  |
| H | -9.71973100  | -0.50150000 | 1.81051400  |
| C | -10.06207900 | 3.70708300  | 0.26112400  |
| H | -8.62463300  | 4.45965900  | 1.67089900  |
| H | -11.37154900 | 2.62158000  | -1.07647600 |
| C | -9.59673500  | -3.59676700 | 0.37594100  |
| H | -8.22408100  | -4.15263600 | -1.20201700 |
| H | -10.86765600 | -2.70856900 | 1.86501600  |
| C | 6.78672600   | 0.61665900  | 0.05209500  |
| C | 7.66813500   | 1.72577900  | 0.09871300  |
| C | 7.31097700   | -0.69211000 | 0.08570400  |
| C | 9.04235000   | 1.49894400  | 0.17604700  |
| O | 7.08802500   | 2.95560000  | 0.06300700  |
| C | 8.68434100   | -0.91711400 | 0.16400700  |
| H | 6.61217800   | -1.51839700 | 0.05058800  |
| C | 9.56567300   | 0.19305100  | 0.20941500  |
| H | 9.74192900   | 2.32452700  | 0.21266800  |
| C | 7.91630200   | 4.12102800  | 0.11793700  |
| O | 9.26379700   | -2.14504500 | 0.20147600  |
| C | 10.97426900  | -0.00423700 | 0.28885400  |
| H | 8.50736000   | 4.11180400  | 1.04563900  |
| H | 8.61182600   | 4.12174500  | -0.73436400 |
| C | 7.00307000   | 5.33713600  | 0.07130200  |
| C | 8.43373200   | -3.31043000 | 0.16457500  |
| C | 12.17568800  | -0.15007500 | 0.35652300  |
| H | 6.30044600   | 5.28127700  | 0.91329900  |
| H | 6.40376500   | 5.29174100  | -0.84773400 |
| C | 7.78757700   | 6.65443700  | 0.12517500  |
| H | 7.74118400   | -3.29849100 | 1.01938900  |
| H | 7.83903800   | -3.31168500 | -0.76119500 |
| C | 9.34350100   | -4.52827500 | 0.22334900  |
| H | 13.23187400  | -0.29115900 | 0.41657400  |
| H | 8.49726800   | 6.69614800  | -0.71489300 |
| H | 8.39460600   | 6.68520000  | 1.04257800  |
| C | 6.88137500   | 7.89221500  | 0.08007600  |
| H | 10.04435400  | -4.48484400 | -0.62054300 |
| H | 9.94603500   | -4.47326700 | 1.13936500  |
| C | 8.55240300   | -5.84238300 | 0.18784100  |
| H | 6.17237600   | 7.85078300  | 0.91960000  |
| H | 6.27499200   | 7.86200900  | -0.83680100 |
| C | 7.66629500   | 9.20806000  | 0.13439800  |
| H | 7.94272000   | -5.88224700 | -0.72762600 |
| H | 7.84441300   | -5.87065200 | 1.02995700  |
| C | 9.45299500   | -7.08368200 | 0.24629400  |
| H | 8.36087200   | 9.28848400  | -0.71175300 |
| H | 6.99662900   | 10.07559800 | 0.10079000  |
| H | 8.25731300   | 9.27715100  | 1.05676600  |
| H | 10.16047200  | -7.05588600 | -0.59501600 |
| H | 10.06173900  | -7.04468700 | 1.16113700  |
| C | 8.66151900   | -8.39625500 | 0.21024700  |
| H | 8.06784500   | -8.47418100 | -0.70976700 |

|    |              |             |             |
|----|--------------|-------------|-------------|
| H  | 9.32716600   | -9.26655300 | 0.25332800  |
| H  | 7.96833200   | -8.46272900 | 1.05873300  |
| N  | -10.81655700 | 4.89774800  | 0.34118300  |
| N  | -10.28288300 | -4.82683000 | 0.46443600  |
| C  | -9.63754700  | -5.92358600 | 0.39028900  |
| H  | -10.19179800 | -6.86208500 | 0.41990400  |
| H  | -8.54296700  | -5.98483600 | 0.31009400  |
| C  | -11.38788100 | 5.36723100  | -0.69674100 |
| H  | -11.99697700 | 6.26637100  | -0.59994700 |
| H  | -11.29594300 | 4.92505800  | -1.69922200 |
| Co | -0.74131500  | -1.28363600 | -0.48076600 |
| Cl | -2.35178600  | -2.55909000 | -1.32584000 |
| Cl | -0.63938600  | -1.73185100 | 1.68295400  |
| C  | 0.56003200   | -2.66570000 | -0.91018800 |
| H  | 1.39835100   | -2.58235700 | -0.21136300 |
| H  | 0.06987000   | -3.62602400 | -0.74640800 |
| C  | 0.94017600   | -2.43842500 | -2.36754300 |
| H  | 1.69520000   | -3.17180200 | -2.69432200 |
| H  | 0.06813200   | -2.55242200 | -3.02004300 |
| H  | 1.36928300   | -1.44216500 | -2.54407900 |

-----

Total electronic Energy ( $E_{\text{total}}$ ) = -3348.950471 (Hartree/Particle).

DFT-optimized geometry of  $\text{H}_2$  (singlet), computed at the B3LYP-D3/ 6-31+G\* (H) level in absence of any solvent.

| Atom | x          | y          | z           |
|------|------------|------------|-------------|
| H    | 0.00000000 | 0.00000000 | 0.37139400  |
| H    | 0.00000000 | 0.00000000 | -0.37139400 |

-----

Total electronic Energy ( $E_{\text{total}}$ ) = -1.175482 (Hartree/Particle).

DFT-optimized geometry of  $\text{CO}_2$  (singlet), computed at the B3LYP-D3/ 6-31+G\* (CO) level in absence of any solvent.

| Atom | x          | y          | z           |
|------|------------|------------|-------------|
| C    | 0.00000000 | 0.00000000 | 0.00000000  |
| O    | 0.00000000 | 0.00000000 | 1.16949100  |
| O    | 0.00000000 | 0.00000000 | -1.16949100 |

-----

Total electronic Energy ( $E_{\text{total}}$ ) = -188.590582 (Hartree/Particle).

DFT-optimized geometry of  $\text{CO}$  (singlet), computed at the B3LYP-D3/ 6-31+G\* (CO) level in absence of any solvent.

| Atom | x          | y          | z           |
|------|------------|------------|-------------|
| C    | 0.00000000 | 0.00000000 | -0.64984200 |
| O    | 0.00000000 | 0.00000000 | 0.48738200  |

Total electronic Energy ( $E_{\text{total}}$ ) = -113.317323 (Hartree/Particle).

DFT-optimized geometry of **H<sub>2</sub>O** (singlet), computed at the B3LYP-D3/ 6-31+G\* (HO) level in absence of any solvent.

| Atom | x          | y           | z           |
|------|------------|-------------|-------------|
| O    | 0.00000000 | 0.00000000  | 0.11732100  |
| H    | 0.00000000 | 0.77131200  | -0.46928400 |
| H    | 0.00000000 | -0.77131200 | -0.46928400 |

Total electronic Energy ( $E_{\text{total}}$ ) = -76.422582 (Hartree/Particle).

DFT-optimized geometry of **CH<sub>3</sub>OH** (singlet), computed at the B3LYP-D3/ 6-31+G\* (HCO) level in absence of any solvent.

| Atom | x           | y           | z           |
|------|-------------|-------------|-------------|
| C    | 0.04669600  | 0.66814000  | 0.00000000  |
| H    | 1.09545200  | 0.97610200  | 0.00000000  |
| H    | -0.43988700 | 1.08085100  | 0.89629700  |
| H    | -0.43988700 | 1.08085100  | -0.89629700 |
| O    | 0.04669600  | -0.75899400 | 0.00000000  |
| H    | -0.86942000 | -1.07469300 | 0.00000000  |

Total electronic Energy ( $E_{\text{total}}$ ) = -115.726317 (Hartree/Particle).

DFT-optimized geometry of **CH<sub>4</sub>** (singlet), computed at the B3LYP-D3/ 6-31+G\* (HC) level in absence of any solvent.

| Atom | x           | y           | z           |
|------|-------------|-------------|-------------|
| C    | 0.00000000  | 0.00000000  | 0.00000000  |
| H    | 0.63189600  | 0.63189600  | 0.63189600  |
| H    | -0.63189600 | -0.63189600 | 0.63189600  |
| H    | -0.63189600 | 0.63189600  | -0.63189600 |
| H    | 0.63189600  | -0.63189600 | -0.63189600 |

---

Total electronic Energy ( $E_{\text{total}}$ ) = -40.520768 (Hartree/Particle).

DFT-optimized geometry of **CH<sub>3</sub>CH<sub>2</sub>OH** (singlet), computed at the B3LYP-D3/ 6-31+G\* (HCO) level in absence of any solvent.

---

| Atom | x           | y           | z           |
|------|-------------|-------------|-------------|
| C    | -1.17761200 | -0.40071500 | 0.00000000  |
| H    | -2.12438900 | 0.15289700  | 0.00000000  |
| H    | -1.14693400 | -1.04194100 | 0.88789900  |
| H    | -1.14693400 | -1.04194100 | -0.88789900 |
| C    | 0.00000000  | 0.55947900  | 0.00000000  |
| H    | -0.03628200 | 1.20685900  | 0.89071500  |
| H    | -0.03628200 | 1.20685900  | -0.89071500 |
| O    | 1.19868000  | -0.22512900 | 0.00000000  |
| H    | 1.96704900  | 0.36571400  | 0.00000000  |

---

Total electronic Energy ( $E_{\text{total}}$ ) = -155.048833 (Hartree/Particle).

DFT-optimized geometry of **CH<sub>3</sub>CH<sub>3</sub>** (singlet), computed at the B3LYP-D3/ 6-31+G\* (HC) level in absence of any solvent.

---

| Atom | x           | y           | z           |
|------|-------------|-------------|-------------|
| C    | 0.00000000  | 0.00000000  | 0.76664200  |
| H    | 0.00000000  | 1.02209500  | 1.16513900  |
| H    | -0.88516000 | -0.51104700 | 1.16513900  |
| H    | 0.88516000  | -0.51104700 | 1.16513900  |
| C    | 0.00000000  | 0.00000000  | -0.76664200 |
| H    | 0.00000000  | -1.02209500 | -1.16513900 |
| H    | -0.88516000 | 0.51104700  | -1.16513900 |
| H    | 0.88516000  | 0.51104700  | -1.16513900 |

---

Total electronic Energy ( $E_{\text{total}}$ ) = -79.835396 (Hartree/Particle).

Calculated total electronic energy ( $E_{\text{total}}$ ), correction of zero-point energy ( $E_{\text{ZPE}}$ ), entropy effect ( $TS$ ), and enthalpy effect ( $\int C_p dT$ ), and Gibbs free energy ( $G$ ) of species in the reaction.

| No. | Species                                   | $E_{\text{total}}$ (eV) | $E_{\text{ZPE}}$ (eV) | TS (eV)  | $\int C_p dT$ (eV) | G (eV)      |
|-----|-------------------------------------------|-------------------------|-----------------------|----------|--------------------|-------------|
| 1   | H <sub>2</sub> O*OH <sub>2</sub>          | -93135.449128           | 23.4041               | 4.719898 | 25.1087            | -93091.6562 |
| 2   | H <sub>2</sub> O*COOH                     | -96202.553126           | 23.4406               | 4.660773 | 25.1369            | -96158.6364 |
| 3   | HOOC*COOH                                 | -99268.057421           | 23.3402               | 4.811217 | 25.0903            | -99224.4381 |
| 4   | OC*COOH                                   | -97206.185396           | 22.9473               | 4.710809 | 24.6540            | -97163.2949 |
| 4a  | *COOH                                     | -94121.544848           | 22.7047               | 4.598066 | 24.3539            | -94079.0843 |
| 5   | OC*CO                                     | -95142.656960           | 22.4685               | 4.736642 | 24.1660            | -95100.7591 |
| 6   | OC*CHO                                    | -95158.506675           | 22.7960               | 4.661433 | 24.4793            | -95115.8928 |
| 6a  | OC*OH <sub>2</sub>                        | -94138.971437           | 22.9272               | 4.737650 | 24.6339            | -94096.1480 |
| 6b  | *COCHO                                    | -95157.629951           | 22.8158               | 4.638974 | 24.4892            | -95114.9639 |
| 7   | OC*OCH <sub>2</sub>                       | -95175.222421           | 23.0431               | 4.847859 | 24.7816            | -95132.2456 |
| 8   | OC*OCH <sub>3</sub>                       | -95191.207540           | 23.4384               | 4.674026 | 25.1353            | -95147.3079 |
| 8a  | *COCH <sub>2</sub> OH                     | -95191.193091           | 23.4819               | 4.642194 | 25.1588            | -95147.1946 |
| 9   | OC*HOCH <sub>3</sub>                      | -95208.535215           | 23.7200               | 4.830650 | 25.4630            | -95164.1829 |
| 9a  | OC*O                                      | -94103.293319           | 22.3511               | 4.593102 | 23.9984            | -94061.5369 |
| 10  | OC*CH <sub>3</sub>                        | -93144.307010           | 23.3046               | 4.611461 | 24.9716            | -93100.6423 |
| 10a | *COCH <sub>3</sub>                        | -93144.071768           | 23.3075               | 4.656248 | 24.9798            | -93100.4407 |
| 11  | *OCHCH <sub>3</sub>                       | -93161.553732           | 23.6234               | 4.701862 | 25.3111            | -93117.3211 |
| 11a | OHC*CH <sub>3</sub>                       | -93159.598729           | 23.5712               | 4.658498 | 25.2512            | -93115.4348 |
| 12  | *OCH <sub>2</sub> CH <sub>3</sub>         | -93177.093863           | 23.9882               | 4.624339 | 25.6552            | -93132.0748 |
| 12a | *CH(OH)CH <sub>3</sub>                    | -93176.525281           | 23.9671               | 4.642957 | 25.6432            | -93131.5579 |
| 13  | *HOCH <sub>2</sub> CH <sub>3</sub>        | -93194.834771           | 24.2880               | 4.757393 | 25.9900            | -93149.3142 |
| 14  | *CH <sub>2</sub> CH <sub>3</sub>          | -91129.630847           | 23.8406               | 4.570644 | 25.4857            | -91084.8752 |
|     | H <sub>2</sub> (g)                        | -31.986511              | 0.2761                | 0.402512 | 0.3660             | -31.7469    |
|     | CO <sub>2</sub> (g)                       | -5131.813763            | 0.3146                | 0.661122 | 0.4120             | -5131.7483  |
|     | CO (g)                                    | -3083.523003            | 0.1366                | 0.610685 | 0.2265             | -3083.7706  |
|     | H <sub>2</sub> O (g)                      | -2079.565448            | 0.5738                | 0.583431 | 0.6766             | -2078.8985  |
|     | CH <sub>3</sub> OH (g)                    | -3149.075102            | 1.3946                | 0.734780 | 1.5104             | -3146.9049  |
|     | CH <sub>4</sub> (g)                       | -1102.626826            | 1.2236                | 0.575143 | 1.3272             | -1100.6512  |
|     | CH <sub>3</sub> CH <sub>2</sub> OH<br>(g) | -4219.095814            | 2.1782                | 0.832163 | 2.3200             | -4215.4298  |

|  |                                     |              |        |          |        |            |
|--|-------------------------------------|--------------|--------|----------|--------|------------|
|  | CH <sub>3</sub> CH <sub>3</sub> (g) | -2172.432895 | 2.0398 | 0.702754 | 2.1598 | -2168.9360 |
|--|-------------------------------------|--------------|--------|----------|--------|------------|

**XYZ Coordinates:**

**Staggard Conformation (AB stacking) of TAPA-OPE:**

Fractional atomic coordinates for the unit cell of **TAPA-OPE COF** with AB stacking.

Space group: *P1*

Lattice parameters:  $a = 55.8364 \text{ \AA}$ ,  $b = 55.822884 \text{ \AA}$ ,  $c = 9.352275 \text{ \AA}$  and  $\alpha = 90.21455^\circ$ ,  $\beta = 90.08816^\circ$ ,  $\gamma = 119.76684^\circ$

| Atom |   | x       | y       | z       |
|------|---|---------|---------|---------|
| C1   | C | 0.30290 | 0.65050 | 0.25248 |
| C2   | C | 0.28961 | 0.62584 | 0.33058 |
| C3   | C | 0.28678 | 0.65875 | 0.17378 |
| C4   | C | 0.26085 | 0.60943 | 0.32782 |
| H5   | H | 0.30158 | 0.61927 | 0.39337 |
| C6   | C | 0.25804 | 0.64266 | 0.17332 |
| H7   | H | 0.29629 | 0.67755 | 0.11193 |
| C8   | C | 0.24475 | 0.61777 | 0.24841 |
| H9   | H | 0.25160 | 0.59052 | 0.38871 |
| H10  | H | 0.24588 | 0.64937 | 0.11284 |
| N11  | N | 0.39742 | 0.61339 | 0.24310 |
| C12  | C | 0.19921 | 0.57736 | 0.28786 |
| H13  | H | 0.20769 | 0.56547 | 0.33401 |
| C14  | C | 0.39597 | 0.83114 | 0.27697 |
| C15  | C | 0.38726 | 0.84905 | 0.33100 |
| N16  | N | 0.42143 | 0.84181 | 0.21586 |
| C17  | C | 0.40483 | 0.87747 | 0.32181 |
| H18  | H | 0.36719 | 0.84107 | 0.38091 |
| C19  | C | 0.43885 | 0.86939 | 0.20544 |
| C20  | C | 0.43091 | 0.88792 | 0.25899 |
| H21  | H | 0.39814 | 0.89129 | 0.36463 |
| H22  | H | 0.45894 | 0.87692 | 0.15629 |
| C23  | C | 0.44933 | 0.91713 | 0.25216 |
| C24  | C | 0.46457 | 0.94185 | 0.24884 |
| C25  | C | 0.48229 | 0.97131 | 0.24794 |
| C26  | C | 0.47115 | 0.98877 | 0.27086 |
| C27  | C | 0.51064 | 0.98240 | 0.22745 |
| H28  | H | 0.51843 | 0.96829 | 0.21058 |
| O29  | O | 0.55733 | 0.02364 | 0.21049 |
| C30  | C | 0.43060 | 0.99339 | 0.31917 |
| H31  | H | 0.43933 | 0.00520 | 0.42019 |
| H32  | H | 0.43465 | 0.00786 | 0.22917 |
| C33  | C | 0.39961 | 0.97478 | 0.33534 |

|     |   |         |         |         |
|-----|---|---------|---------|---------|
| H34 | H | 0.39123 | 0.96285 | 0.23444 |
| H35 | H | 0.39585 | 0.95989 | 0.42276 |
| C36 | C | 0.38483 | 0.99107 | 0.36936 |
| H37 | H | 0.38864 | 0.00617 | 0.28295 |
| H38 | H | 0.39296 | 0.00268 | 0.47142 |
| C39 | C | 0.35377 | 0.97121 | 0.38279 |
| H40 | H | 0.34562 | 0.96005 | 0.27977 |
| H41 | H | 0.35003 | 0.95567 | 0.46654 |
| C42 | C | 0.33809 | 0.98620 | 0.42145 |
| H43 | H | 0.34070 | 0.00125 | 0.33704 |
| H44 | H | 0.31579 | 0.97086 | 0.43084 |
| H45 | H | 0.34560 | 0.00266 | 0.52503 |
| C46 | C | 0.34937 | 0.65356 | 0.25203 |
| C47 | C | 0.37411 | 0.66473 | 0.33094 |
| C48 | C | 0.34109 | 0.62923 | 0.17275 |
| C49 | C | 0.39048 | 0.65215 | 0.32841 |
| H50 | H | 0.38079 | 0.68322 | 0.39436 |
| C51 | C | 0.35710 | 0.61634 | 0.17271 |
| H52 | H | 0.32225 | 0.62011 | 0.11046 |
| C53 | C | 0.38195 | 0.62778 | 0.24847 |
| H54 | H | 0.40935 | 0.66156 | 0.39015 |
| H55 | H | 0.35021 | 0.59744 | 0.11223 |
| N56 | N | 0.38676 | 0.78480 | 0.24238 |
| C57 | C | 0.42237 | 0.62233 | 0.28782 |
| H58 | H | 0.43457 | 0.64279 | 0.33336 |
| C59 | C | 0.16919 | 0.56519 | 0.27648 |
| C60 | C | 0.15177 | 0.53851 | 0.32962 |
| N61 | N | 0.15800 | 0.57955 | 0.21602 |
| C62 | C | 0.12327 | 0.52736 | 0.32044 |
| H63 | H | 0.16022 | 0.52672 | 0.37856 |
| C64 | C | 0.13026 | 0.56912 | 0.20583 |
| C65 | C | 0.11223 | 0.54263 | 0.25867 |
| H66 | H | 0.10986 | 0.50679 | 0.36194 |
| H67 | H | 0.12231 | 0.58138 | 0.15696 |
| C68 | C | 0.08293 | 0.53155 | 0.25185 |
| C69 | C | 0.05810 | 0.52201 | 0.24854 |
| C70 | C | 0.02872 | 0.51064 | 0.24779 |
| C71 | C | 0.01099 | 0.48223 | 0.27109 |
| C72 | C | 0.01774 | 0.52816 | 0.22765 |
| H73 | H | 0.03207 | 0.54991 | 0.21097 |
| O74 | O | 0.97683 | 0.53444 | 0.21030 |
| C75 | C | 0.00583 | 0.43690 | 0.31962 |
| H76 | H | 0.99422 | 0.43419 | 0.42050 |
| H77 | H | 0.99120 | 0.42674 | 0.22934 |
| C78 | C | 0.02401 | 0.42385 | 0.33547 |
| H79 | H | 0.03558 | 0.42691 | 0.23417 |
| H80 | H | 0.03921 | 0.43478 | 0.42259 |
| C81 | C | 0.00741 | 0.39296 | 0.36969 |
| H82 | H | 0.99200 | 0.38179 | 0.28374 |
| H83 | H | 0.99612 | 0.38987 | 0.47208 |
| C84 | C | 0.02702 | 0.38128 | 0.38259 |
| H85 | H | 0.03794 | 0.38392 | 0.27954 |
| H86 | H | 0.04279 | 0.39294 | 0.46618 |
| C87 | C | 0.01189 | 0.35078 | 0.42166 |
| H88 | H | 0.99645 | 0.33840 | 0.33815 |
| H89 | H | 0.02709 | 0.34350 | 0.42996 |
| H90 | H | 1.00124 | 0.34759 | 0.52604 |
| C91 | C | 0.34610 | 0.69687 | 0.25106 |
| C92 | C | 0.33513 | 0.71082 | 0.32895 |
| C93 | C | 0.37044 | 0.71261 | 0.17240 |



|      |   |         |         |         |
|------|---|---------|---------|---------|
| C94  | C | 0.34785 | 0.73961 | 0.32642 |
| H95  | H | 0.31665 | 0.69929 | 0.39215 |
| C96  | C | 0.38346 | 0.74135 | 0.17223 |
| H97  | H | 0.37937 | 0.70255 | 0.11111 |
| C98  | C | 0.37226 | 0.75519 | 0.24733 |
| H99  | H | 0.33865 | 0.74936 | 0.38804 |
| H100 | H | 0.40241 | 0.75305 | 0.11266 |
| N101 | N | 0.21525 | 0.60249 | 0.24274 |
| C102 | C | 0.37806 | 0.80114 | 0.28817 |
| H103 | H | 0.35775 | 0.79309 | 0.33427 |
| C104 | C | 0.43473 | 0.60440 | 0.27661 |
| C105 | C | 0.46126 | 0.61331 | 0.33091 |
| N106 | N | 0.42015 | 0.57893 | 0.21513 |
| C107 | C | 0.47234 | 0.59576 | 0.32181 |
| H108 | H | 0.47320 | 0.63345 | 0.38080 |
| C109 | C | 0.43054 | 0.56145 | 0.20485 |
| C110 | C | 0.45692 | 0.56960 | 0.25887 |
| H111 | H | 0.49284 | 0.60264 | 0.36436 |
| H112 | H | 0.41816 | 0.54135 | 0.15508 |
| C113 | C | 0.46802 | 0.55121 | 0.25193 |
| C114 | C | 0.47759 | 0.53600 | 0.24861 |
| C115 | C | 0.48920 | 0.51798 | 0.24775 |
| C116 | C | 0.51767 | 0.52882 | 0.27114 |
| C117 | C | 0.47180 | 0.48963 | 0.22732 |
| H118 | H | 0.45001 | 0.48212 | 0.21046 |
| O119 | O | 0.46590 | 0.44257 | 0.21005 |
| C120 | C | 0.56294 | 0.56907 | 0.31969 |
| H121 | H | 0.56598 | 0.56041 | 0.42067 |
| H122 | H | 0.57313 | 0.56459 | 0.22968 |
| C123 | C | 0.57569 | 0.60022 | 0.33546 |
| H124 | H | 0.57233 | 0.60857 | 0.23428 |
| H125 | H | 0.56477 | 0.60450 | 0.42249 |
| C126 | C | 0.60664 | 0.61460 | 0.36978 |
| H127 | H | 0.61777 | 0.61037 | 0.28365 |
| H128 | H | 0.60998 | 0.60650 | 0.47197 |
| C129 | C | 0.61815 | 0.64579 | 0.38320 |
| H130 | H | 0.61525 | 0.65395 | 0.28032 |
| H131 | H | 0.60656 | 0.64993 | 0.46700 |
| C132 | C | 0.64873 | 0.66117 | 0.42202 |
| H133 | H | 0.66101 | 0.65803 | 0.33830 |
| H134 | H | 0.65590 | 0.68359 | 0.43027 |
| H135 | H | 0.65223 | 0.65387 | 0.52627 |
| C136 | C | 0.69717 | 0.34945 | 0.24261 |
| C137 | C | 0.71052 | 0.37420 | 0.16541 |
| C138 | C | 0.71320 | 0.34101 | 0.32058 |
| C139 | C | 0.73932 | 0.39057 | 0.16856 |
| H140 | H | 0.69865 | 0.38094 | 0.10310 |
| C141 | C | 0.74197 | 0.35706 | 0.32142 |
| H142 | H | 0.70366 | 0.32215 | 0.38181 |
| C143 | C | 0.75532 | 0.38205 | 0.24743 |
| H144 | H | 0.74863 | 0.40955 | 0.10827 |
| H145 | H | 0.75407 | 0.35023 | 0.38154 |
| N146 | N | 0.60282 | 0.38697 | 0.25324 |
| C147 | C | 0.80089 | 0.42254 | 0.21022 |
| H148 | H | 0.79245 | 0.43455 | 0.16509 |
| C149 | C | 0.60369 | 0.16878 | 0.22137 |
| C150 | C | 0.61247 | 0.15085 | 0.16885 |
| N151 | N | 0.57816 | 0.15817 | 0.28153 |
| C152 | C | 0.59491 | 0.12243 | 0.17861 |
| H153 | H | 0.63260 | 0.15878 | 0.11973 |

|      |   |         |         |          |
|------|---|---------|---------|----------|
| C154 | C | 0.56073 | 0.13059 | 0.29247  |
| C155 | C | 0.56876 | 0.11203 | 0.24046  |
| H156 | H | 0.60167 | 0.10858 | 0.13702  |
| H157 | H | 0.54059 | 0.12310 | 0.34084  |
| C158 | C | 0.55035 | 0.08281 | 0.24781  |
| C159 | C | 0.53514 | 0.05810 | 0.25145  |
| C160 | C | 0.51743 | 0.02863 | 0.25260  |
| C161 | C | 0.52858 | 0.01118 | 0.22971  |
| C162 | C | 0.48907 | 0.01754 | 0.27313  |
| H163 | H | 0.48127 | 0.03164 | 0.28997  |
| O164 | O | 0.44240 | 0.97628 | 0.29003  |
| C165 | C | 0.56906 | 0.00646 | 0.18158  |
| H166 | H | 0.56031 | 0.99463 | 0.08065  |
| H167 | H | 0.56497 | 0.99201 | 0.27172  |
| C168 | C | 0.60008 | 0.02495 | 0.16533  |
| H169 | H | 0.60851 | 0.03690 | 0.26614  |
| H170 | H | 0.60391 | 0.03984 | 0.07778  |
| C171 | C | 0.61469 | 0.00850 | 0.13149  |
| H172 | H | 0.61080 | 0.99339 | 0.21803  |
| H173 | H | 0.60651 | 0.99688 | 0.02951  |
| C174 | C | 0.64578 | 0.02819 | 0.11798  |
| H175 | H | 0.65399 | 0.03936 | 0.22092  |
| H176 | H | 0.64962 | 0.04373 | 0.03411  |
| C177 | C | 0.66128 | 0.01300 | 0.07951  |
| H178 | H | 0.65857 | 0.99794 | 0.16403  |
| H179 | H | 0.68361 | 0.02823 | 0.07009  |
| H180 | H | 0.65372 | 1.00185 | -0.02402 |
| C181 | C | 0.65073 | 0.34659 | 0.24306  |
| C182 | C | 0.62583 | 0.33541 | 0.16521  |
| C183 | C | 0.65918 | 0.37108 | 0.32141  |
| C184 | C | 0.60955 | 0.34807 | 0.16806  |
| H185 | H | 0.61900 | 0.31681 | 0.10235  |
| C186 | C | 0.64325 | 0.38404 | 0.32176  |
| H187 | H | 0.67812 | 0.38023 | 0.38301  |
| C188 | C | 0.61826 | 0.37255 | 0.24725  |
| H189 | H | 0.59058 | 0.33863 | 0.10704  |
| H190 | H | 0.65027 | 0.40302 | 0.38175  |
| N191 | N | 0.61287 | 0.21515 | 0.25393  |
| C192 | C | 0.57778 | 0.37795 | 0.21022  |
| H193 | H | 0.56546 | 0.35740 | 0.16591  |
| C194 | C | 0.83091 | 0.43470 | 0.22218  |
| C195 | C | 0.84834 | 0.46150 | 0.17063  |
| N196 | N | 0.84206 | 0.42023 | 0.28173  |
| C197 | C | 0.87684 | 0.47266 | 0.18046  |
| H198 | H | 0.83992 | 0.47337 | 0.12244  |
| C199 | C | 0.86979 | 0.43068 | 0.29253  |
| C200 | C | 0.88785 | 0.45729 | 0.24129  |
| H201 | H | 0.89026 | 0.49332 | 0.14019  |
| H202 | H | 0.87772 | 0.41833 | 0.34062  |
| C203 | C | 0.91714 | 0.46842 | 0.24868  |
| C204 | C | 0.94198 | 0.47800 | 0.25232  |
| C205 | C | 0.97136 | 0.48940 | 0.25336  |
| C206 | C | 0.98909 | 0.51782 | 0.23010  |
| C207 | C | 0.98234 | 0.47189 | 0.27356  |
| H208 | H | 0.96803 | 0.45013 | 0.29020  |
| O209 | O | 0.02327 | 0.46563 | 0.29081  |
| C210 | C | 0.99434 | 0.56317 | 0.18150  |
| H211 | H | 0.00595 | 0.56585 | 0.08068  |
| H212 | H | 0.00897 | 0.57330 | 0.27184  |
| C213 | C | 0.97628 | 0.57636 | 0.16547  |

|      |   |         |         |          |
|------|---|---------|---------|----------|
| H214 | H | 0.96473 | 0.57338 | 0.26674  |
| H215 | H | 0.96108 | 0.56547 | 0.07834  |
| C216 | C | 0.99305 | 0.60724 | 0.13108  |
| H217 | H | 0.00847 | 0.61837 | 0.21703  |
| H218 | H | 0.00432 | 0.61025 | 0.02872  |
| C219 | C | 0.97360 | 0.61911 | 0.11791  |
| H220 | H | 0.96270 | 0.61656 | 0.22092  |
| H221 | H | 0.95781 | 0.60749 | 0.03435  |
| C222 | C | 0.98891 | 0.64960 | 0.07859  |
| H223 | H | 0.00439 | 0.66193 | 0.16205  |
| H224 | H | 0.97382 | 0.65702 | 0.07017  |
| H225 | H | 0.00046 | 0.65270 | -0.02579 |
| C226 | C | 0.65377 | 0.30313 | 0.24406  |
| C227 | C | 0.66473 | 0.28904 | 0.16710  |
| C228 | C | 0.62930 | 0.28743 | 0.32198  |
| C229 | C | 0.65192 | 0.26025 | 0.16988  |
| H230 | H | 0.68330 | 0.30050 | 0.10440  |
| C231 | C | 0.61619 | 0.25868 | 0.32241  |
| H232 | H | 0.62035 | 0.29754 | 0.38267  |
| C233 | C | 0.62740 | 0.24475 | 0.24838  |
| H234 | H | 0.66111 | 0.25042 | 0.10889  |
| H235 | H | 0.59717 | 0.24704 | 0.38163  |
| N236 | N | 0.78484 | 0.39731 | 0.25375  |
| C237 | C | 0.62162 | 0.19877 | 0.20966  |
| H238 | H | 0.64201 | 0.20677 | 0.16462  |
| C239 | C | 0.56542 | 0.39589 | 0.22198  |
| C240 | C | 0.53877 | 0.38687 | 0.16939  |
| N241 | N | 0.58013 | 0.42144 | 0.28235  |
| C242 | C | 0.52767 | 0.40441 | 0.17908  |
| H243 | H | 0.52673 | 0.36666 | 0.12038  |
| C244 | C | 0.56972 | 0.43891 | 0.29319  |
| C245 | C | 0.54322 | 0.43064 | 0.24090  |
| H246 | H | 0.50708 | 0.39745 | 0.13784  |
| H247 | H | 0.58221 | 0.45908 | 0.34205  |
| C248 | C | 0.53207 | 0.44901 | 0.24834  |
| C249 | C | 0.52248 | 0.46417 | 0.25198  |
| C250 | C | 0.51084 | 0.48218 | 0.25311  |
| C251 | C | 0.48236 | 0.47133 | 0.22977  |
| C252 | C | 0.52824 | 0.51053 | 0.27359  |
| H253 | H | 0.55004 | 0.51807 | 0.29041  |
| O254 | O | 0.53411 | 0.55759 | 0.29080  |
| C255 | C | 0.43706 | 0.43114 | 0.18129  |
| H256 | H | 0.43404 | 0.43984 | 0.08039  |
| H257 | H | 0.42692 | 0.43566 | 0.27141  |
| C258 | C | 0.42418 | 0.39998 | 0.16541  |
| H259 | H | 0.42748 | 0.39158 | 0.26653  |
| H260 | H | 0.43504 | 0.39563 | 0.07831  |
| C261 | C | 0.39323 | 0.38577 | 0.13111  |
| H262 | H | 0.38217 | 0.39008 | 0.21730  |
| H263 | H | 0.38996 | 0.39393 | 0.02897  |
| C264 | C | 0.38153 | 0.35455 | 0.11754  |
| H265 | H | 0.38436 | 0.34633 | 0.22038  |
| H266 | H | 0.39305 | 0.35033 | 0.03371  |
| C267 | C | 0.35095 | 0.33937 | 0.07868  |
| H268 | H | 0.33874 | 0.34260 | 0.16243  |
| H269 | H | 0.34363 | 0.31692 | 0.07038  |
| H270 | H | 0.34752 | 0.34673 | -0.02555 |
| N271 | N | 0.33285 | 0.66707 | 0.25216  |
| N272 | N | 0.66712 | 0.33294 | 0.24287  |
| C273 | C | 0.97284 | 0.98057 | 0.75737  |

|      |   |         |         |         |
|------|---|---------|---------|---------|
| C274 | C | 0.95948 | 0.95579 | 0.83459 |
| C275 | C | 0.95679 | 0.98898 | 0.67942 |
| C276 | C | 0.93068 | 0.93943 | 0.83144 |
| H277 | H | 0.97135 | 0.94906 | 0.89690 |
| C278 | C | 0.92803 | 0.97294 | 0.67857 |
| H279 | H | 0.96634 | 0.00786 | 0.61820 |
| C280 | C | 0.91469 | 0.94795 | 0.75256 |
| H281 | H | 0.92137 | 0.92045 | 0.89173 |
| H282 | H | 0.91593 | 0.97977 | 0.61846 |
| N283 | N | 0.06716 | 0.94304 | 0.74676 |
| C284 | C | 0.86912 | 0.90747 | 0.78980 |
| H285 | H | 0.87755 | 0.89545 | 0.83491 |
| C286 | C | 0.06631 | 0.16120 | 0.77867 |
| C287 | C | 0.05753 | 0.17917 | 0.83110 |
| N288 | N | 0.09185 | 0.17185 | 0.71846 |
| C289 | C | 0.07508 | 0.20756 | 0.82135 |
| H290 | H | 0.03739 | 0.17122 | 0.88027 |
| C291 | C | 0.10926 | 0.19940 | 0.70751 |
| C292 | C | 0.10125 | 0.21799 | 0.75948 |
| H293 | H | 0.06834 | 0.22142 | 0.86301 |
| H294 | H | 0.12941 | 0.20690 | 0.65917 |
| C295 | C | 0.11963 | 0.24717 | 0.75220 |
| C296 | C | 0.13487 | 0.27191 | 0.74858 |
| C297 | C | 0.15256 | 0.30136 | 0.74742 |
| C298 | C | 0.14143 | 0.31883 | 0.77029 |
| C299 | C | 0.18093 | 0.31247 | 0.72686 |
| H300 | H | 0.18873 | 0.29836 | 0.71004 |
| O301 | O | 0.22760 | 0.35372 | 0.70998 |
| C302 | C | 0.10094 | 0.32354 | 0.81843 |
| H303 | H | 0.10969 | 0.33537 | 0.91937 |
| H304 | H | 0.10503 | 0.33800 | 0.72829 |
| C305 | C | 0.06992 | 0.30505 | 0.83466 |
| H306 | H | 0.06149 | 0.29310 | 0.73385 |
| H307 | H | 0.06609 | 0.29017 | 0.92223 |
| C308 | C | 0.05531 | 0.32150 | 0.86849 |
| H309 | H | 0.05920 | 0.33661 | 0.78198 |
| H310 | H | 0.06349 | 0.33312 | 0.97048 |
| C311 | C | 0.02422 | 0.30181 | 0.88202 |
| H312 | H | 0.01601 | 0.29064 | 0.77908 |
| H313 | H | 0.02038 | 0.28627 | 0.96589 |
| C314 | C | 0.00872 | 0.31700 | 0.92049 |
| H315 | H | 0.01143 | 0.33206 | 0.83596 |
| H316 | H | 0.01361 | 0.30177 | 0.92991 |
| H317 | H | 0.01628 | 0.32815 | 1.02402 |
| C318 | C | 0.01926 | 0.98344 | 0.75695 |
| C319 | C | 0.04418 | 0.99458 | 0.83478 |
| C320 | C | 0.01083 | 0.95891 | 0.67857 |
| C321 | C | 0.06044 | 0.98194 | 0.83193 |
| H322 | H | 0.05100 | 0.01319 | 0.89766 |
| C323 | C | 0.02674 | 0.94597 | 0.67823 |
| H324 | H | 0.99188 | 0.94977 | 0.61699 |
| C325 | C | 0.05175 | 0.95743 | 0.75274 |
| H326 | H | 0.07942 | 0.99137 | 0.89296 |
| H327 | H | 0.01973 | 0.92698 | 0.61826 |
| N328 | N | 0.05714 | 0.11485 | 0.74611 |
| C329 | C | 0.09224 | 0.95204 | 0.78980 |
| H330 | H | 0.10454 | 0.97260 | 0.83409 |
| C331 | C | 0.83908 | 0.89529 | 0.77781 |
| C332 | C | 0.82166 | 0.86851 | 0.82936 |
| N333 | N | 0.82795 | 0.90977 | 0.71828 |

|      |   |         |         |         |
|------|---|---------|---------|---------|
| C334 | C | 0.79316 | 0.85733 | 0.81953 |
| H335 | H | 0.83008 | 0.85663 | 0.87757 |
| C336 | C | 0.80020 | 0.89932 | 0.70747 |
| C337 | C | 0.78216 | 0.87271 | 0.75870 |
| H338 | H | 0.77974 | 0.83668 | 0.85982 |
| H339 | H | 0.79228 | 0.91167 | 0.65939 |
| C340 | C | 0.75285 | 0.86158 | 0.75133 |
| C341 | C | 0.72803 | 0.85200 | 0.74769 |
| C342 | C | 0.69864 | 0.84060 | 0.74663 |
| C343 | C | 0.68091 | 0.81218 | 0.76990 |
| C344 | C | 0.68766 | 0.85811 | 0.72643 |
| H345 | H | 0.70197 | 0.87987 | 0.70980 |
| O346 | O | 0.64672 | 0.86437 | 0.70919 |
| C347 | C | 0.67566 | 0.76683 | 0.81850 |
| H348 | H | 0.66404 | 0.76415 | 0.91932 |
| H349 | H | 0.66103 | 0.75670 | 0.72816 |
| C350 | C | 0.69372 | 0.75364 | 0.83453 |
| H351 | H | 0.70527 | 0.75662 | 0.73327 |
| H352 | H | 0.70892 | 0.76453 | 0.92166 |
| C353 | C | 0.67695 | 0.72276 | 0.86892 |
| H354 | H | 0.66153 | 0.71163 | 0.78297 |
| H355 | H | 0.66568 | 0.71975 | 0.97128 |
| C356 | C | 0.69640 | 0.71089 | 0.88209 |
| H357 | H | 0.70730 | 0.71344 | 0.77908 |
| H358 | H | 0.71219 | 0.72251 | 0.96565 |
| C359 | C | 0.68109 | 0.68040 | 0.92141 |
| H360 | H | 0.66561 | 0.66807 | 0.83794 |
| H361 | H | 0.69618 | 0.67299 | 0.92983 |
| H362 | H | 0.67046 | 0.67730 | 1.02579 |
| C363 | C | 0.01624 | 0.02692 | 0.75593 |
| C364 | C | 0.00526 | 0.04094 | 0.83288 |
| C365 | C | 0.04069 | 0.04255 | 0.67800 |
| C366 | C | 0.01809 | 0.06977 | 0.83009 |
| H367 | H | 0.98671 | 0.02951 | 0.89563 |
| C368 | C | 0.05381 | 0.07133 | 0.67756 |
| H369 | H | 0.04965 | 0.03246 | 0.61736 |
| C370 | C | 0.04259 | 0.08524 | 0.75160 |
| H371 | H | 0.00889 | 0.07958 | 0.89112 |
| H372 | H | 0.07283 | 0.08296 | 0.61838 |
| N373 | N | 0.88515 | 0.93268 | 0.74625 |
| C374 | C | 0.04837 | 0.13124 | 0.79034 |
| H375 | H | 0.02799 | 0.12323 | 0.83539 |
| C376 | C | 0.10458 | 0.93411 | 0.77801 |
| C377 | C | 0.13123 | 0.94313 | 0.83061 |
| N378 | N | 0.08987 | 0.90856 | 0.71765 |
| C379 | C | 0.14233 | 0.92559 | 0.82092 |
| H380 | H | 0.14327 | 0.96334 | 0.87962 |
| C381 | C | 0.10028 | 0.89109 | 0.70680 |
| C382 | C | 0.12679 | 0.89936 | 0.75910 |
| H383 | H | 0.16292 | 0.93255 | 0.86216 |
| H384 | H | 0.08779 | 0.87092 | 0.65796 |
| C385 | C | 0.13793 | 0.88099 | 0.75167 |
| C386 | C | 0.14752 | 0.86583 | 0.74803 |
| C387 | C | 0.15916 | 0.84782 | 0.74689 |
| C388 | C | 0.18764 | 0.85867 | 0.77023 |
| C389 | C | 0.14176 | 0.81947 | 0.72640 |
| H390 | H | 0.11996 | 0.81193 | 0.70959 |
| O391 | O | 0.13589 | 0.77241 | 0.70920 |
| C392 | C | 0.23294 | 0.89886 | 0.81871 |
| H393 | H | 0.23596 | 0.89016 | 0.91961 |

|      |   |         |         |         |
|------|---|---------|---------|---------|
| H394 | H | 0.24308 | 0.89434 | 0.72859 |
| C395 | C | 0.24582 | 0.93002 | 0.83459 |
| H396 | H | 0.24252 | 0.93842 | 0.73346 |
| H397 | H | 0.23496 | 0.93437 | 0.92169 |
| C398 | C | 0.27677 | 0.94423 | 0.86889 |
| H399 | H | 0.28783 | 0.93992 | 0.78270 |
| H400 | H | 0.28004 | 0.93607 | 0.97103 |
| C401 | C | 0.28847 | 0.97545 | 0.88246 |
| H402 | H | 0.28564 | 0.98367 | 0.77962 |
| H403 | H | 0.27695 | 0.97967 | 0.96629 |
| C404 | C | 0.31905 | 0.99063 | 0.92132 |
| H405 | H | 0.33126 | 0.98740 | 0.83757 |
| H406 | H | 0.32637 | 1.01308 | 0.92962 |
| H407 | H | 0.32248 | 0.98327 | 1.02555 |
| C408 | C | 0.36711 | 0.67951 | 0.74749 |
| C409 | C | 0.38039 | 0.70415 | 0.66941 |
| C410 | C | 0.38322 | 0.67124 | 0.82622 |
| C411 | C | 0.40914 | 0.72057 | 0.67218 |
| H412 | H | 0.36842 | 0.71073 | 0.60664 |
| C413 | C | 0.41196 | 0.68734 | 0.82667 |
| H414 | H | 0.37371 | 0.65245 | 0.88807 |
| C415 | C | 0.42525 | 0.71223 | 0.75159 |
| H416 | H | 0.41840 | 0.73948 | 0.61130 |
| H417 | H | 0.42412 | 0.68063 | 0.88716 |
| N418 | N | 0.27256 | 0.71661 | 0.75690 |
| C419 | C | 0.47080 | 0.75265 | 0.71216 |
| H420 | H | 0.46231 | 0.76453 | 0.66599 |
| C421 | C | 0.27403 | 0.49885 | 0.72307 |
| C422 | C | 0.28273 | 0.48096 | 0.66896 |
| N423 | N | 0.24857 | 0.48820 | 0.78414 |
| C424 | C | 0.26517 | 0.45253 | 0.67814 |
| H425 | H | 0.30281 | 0.48893 | 0.61908 |
| C426 | C | 0.23114 | 0.46060 | 0.79455 |
| C427 | C | 0.23909 | 0.44210 | 0.74095 |
| H428 | H | 0.27187 | 0.43872 | 0.63539 |
| H429 | H | 0.21106 | 0.45308 | 0.84373 |
| C430 | C | 0.22066 | 0.41285 | 0.74785 |
| C431 | C | 0.20544 | 0.38817 | 0.75120 |
| C432 | C | 0.18771 | 0.35868 | 0.75208 |
| C433 | C | 0.19885 | 0.34124 | 0.72913 |
| C434 | C | 0.15936 | 0.34760 | 0.77255 |
| H435 | H | 0.15157 | 0.36171 | 0.78943 |
| O436 | O | 0.11267 | 0.30636 | 0.78952 |
| C437 | C | 0.23940 | 0.33661 | 0.68085 |
| H438 | H | 0.23067 | 0.32480 | 0.57982 |
| H439 | H | 0.23534 | 0.32214 | 0.77084 |
| C440 | C | 0.27040 | 0.35522 | 0.66467 |
| H441 | H | 0.27878 | 0.36715 | 0.76556 |
| H442 | H | 0.27415 | 0.37011 | 0.57725 |
| C443 | C | 0.28517 | 0.33893 | 0.63063 |
| H444 | H | 0.28137 | 0.32383 | 0.71704 |
| H445 | H | 0.27703 | 0.32732 | 0.52858 |
| C446 | C | 0.31623 | 0.35879 | 0.61720 |
| H447 | H | 0.32438 | 0.36995 | 0.72023 |
| H448 | H | 0.31997 | 0.37433 | 0.53347 |
| C449 | C | 0.33191 | 0.34380 | 0.57854 |
| H450 | H | 0.32930 | 0.32875 | 0.66297 |
| H451 | H | 0.35421 | 0.35914 | 0.56917 |
| H452 | H | 0.32441 | 0.33266 | 0.47496 |
| C453 | C | 0.32061 | 0.67646 | 0.74796 |

|      |   |         |         |         |
|------|---|---------|---------|---------|
| C454 | C | 0.29589 | 0.66526 | 0.66905 |
| C455 | C | 0.32891 | 0.70076 | 0.82723 |
| C456 | C | 0.27952 | 0.67786 | 0.67158 |
| H457 | H | 0.28921 | 0.64678 | 0.60564 |
| C458 | C | 0.31289 | 0.71366 | 0.82728 |
| H459 | H | 0.34775 | 0.70989 | 0.88954 |
| C460 | C | 0.28806 | 0.70221 | 0.75152 |
| H461 | H | 0.26065 | 0.66843 | 0.60984 |
| H462 | H | 0.31978 | 0.73256 | 0.88777 |
| N463 | N | 0.28325 | 0.54520 | 0.75766 |
| C464 | C | 0.24764 | 0.70767 | 0.71220 |
| H465 | H | 0.23543 | 0.68721 | 0.66664 |
| C466 | C | 0.50081 | 0.76480 | 0.72351 |
| C467 | C | 0.51823 | 0.79149 | 0.67038 |
| N468 | N | 0.51201 | 0.75045 | 0.78399 |
| C469 | C | 0.54673 | 0.80263 | 0.67955 |
| H470 | H | 0.50978 | 0.80328 | 0.62144 |
| C471 | C | 0.53974 | 0.76088 | 0.79417 |
| C472 | C | 0.55778 | 0.78737 | 0.74133 |
| H473 | H | 0.56013 | 0.82321 | 0.63807 |
| H474 | H | 0.54770 | 0.74862 | 0.84305 |
| C475 | C | 0.58706 | 0.79845 | 0.74816 |
| C476 | C | 0.61190 | 0.80799 | 0.75146 |
| C477 | C | 0.64127 | 0.81936 | 0.75221 |
| C478 | C | 0.65901 | 0.84777 | 0.72890 |
| C479 | C | 0.65225 | 0.80184 | 0.77235 |
| H480 | H | 0.63793 | 0.78009 | 0.78903 |
| O481 | O | 0.69317 | 0.79556 | 0.78970 |
| C482 | C | 0.66417 | 0.89310 | 0.68038 |
| H483 | H | 0.67577 | 0.89581 | 0.57950 |
| H484 | H | 0.67880 | 0.90326 | 0.77066 |
| C485 | C | 0.64599 | 0.90615 | 0.66453 |
| H486 | H | 0.63442 | 0.90309 | 0.76583 |
| H487 | H | 0.63079 | 0.89522 | 0.57741 |
| C488 | C | 0.66259 | 0.93704 | 0.63031 |
| H489 | H | 0.67800 | 0.94822 | 0.71626 |
| H490 | H | 0.67388 | 0.94013 | 0.52792 |
| C491 | C | 0.64297 | 0.94872 | 0.61741 |
| H492 | H | 0.63206 | 0.94608 | 0.72045 |
| H493 | H | 0.62721 | 0.93706 | 0.53382 |
| C494 | C | 0.65811 | 0.97922 | 0.57834 |
| H495 | H | 0.67355 | 0.99160 | 0.66185 |
| H496 | H | 0.64291 | 0.98650 | 0.57004 |
| H497 | H | 0.66876 | 0.98241 | 0.47396 |
| C498 | C | 0.32391 | 0.63317 | 0.74893 |
| C499 | C | 0.33487 | 0.61916 | 0.67103 |
| C500 | C | 0.29954 | 0.61737 | 0.82758 |
| C501 | C | 0.32216 | 0.59040 | 0.67355 |
| H502 | H | 0.35336 | 0.63071 | 0.60788 |
| C503 | C | 0.28654 | 0.58866 | 0.82775 |
| H504 | H | 0.29063 | 0.62745 | 0.88892 |
| C505 | C | 0.29773 | 0.57480 | 0.75265 |
| H506 | H | 0.33135 | 0.58064 | 0.61198 |
| H507 | H | 0.26759 | 0.57694 | 0.88736 |
| N508 | N | 0.45474 | 0.72750 | 0.75726 |
| C509 | C | 0.29194 | 0.52887 | 0.71185 |
| H510 | H | 0.31226 | 0.53690 | 0.66575 |
| C511 | C | 0.23527 | 0.72561 | 0.72339 |
| C512 | C | 0.20874 | 0.71669 | 0.66909 |
| N513 | N | 0.24985 | 0.75107 | 0.78487 |

|      |   |         |         |         |
|------|---|---------|---------|---------|
| C514 | C | 0.19766 | 0.73425 | 0.67818 |
| H515 | H | 0.19680 | 0.69655 | 0.61920 |
| C516 | C | 0.23946 | 0.76855 | 0.79514 |
| C517 | C | 0.21308 | 0.76040 | 0.74113 |
| H518 | H | 0.17716 | 0.72736 | 0.63565 |
| H519 | H | 0.25184 | 0.78865 | 0.84493 |
| C520 | C | 0.20198 | 0.77879 | 0.74807 |
| C521 | C | 0.19241 | 0.79400 | 0.75140 |
| C522 | C | 0.18080 | 0.81202 | 0.75225 |
| C523 | C | 0.15233 | 0.80118 | 0.72886 |
| C524 | C | 0.19820 | 0.84037 | 0.77268 |
| H525 | H | 0.21999 | 0.84789 | 0.78954 |
| O526 | O | 0.20410 | 0.88743 | 0.78995 |
| C527 | C | 0.10706 | 0.76093 | 0.68031 |
| H528 | H | 0.10402 | 0.76959 | 0.57933 |
| H529 | H | 0.09687 | 0.76541 | 0.77032 |
| C530 | C | 0.09431 | 0.72978 | 0.66454 |
| H531 | H | 0.09767 | 0.72143 | 0.76571 |
| H532 | H | 0.10523 | 0.72550 | 0.57751 |
| C533 | C | 0.06336 | 0.71540 | 0.63022 |
| H534 | H | 0.05223 | 0.71963 | 0.71635 |
| H535 | H | 0.06002 | 0.72350 | 0.52803 |
| C536 | C | 0.05185 | 0.68421 | 0.61680 |
| H537 | H | 0.05475 | 0.67605 | 0.71968 |
| H538 | H | 0.06344 | 0.68007 | 0.53300 |
| C539 | C | 0.02127 | 0.66883 | 0.57798 |
| H540 | H | 0.00899 | 0.67196 | 0.66170 |
| H541 | H | 0.01410 | 0.64641 | 0.56973 |
| H542 | H | 0.01777 | 0.67613 | 0.47373 |
| N543 | N | 0.00287 | 0.99700 | 0.75715 |
| N544 | N | 0.33714 | 0.66288 | 0.74784 |

**Eclipsed Conformation (AA stacking) of TAPA-OPE:**

Space group:  $P\bar{3}$

Lattice parameters:  $a = b = 55.932229 \text{ \AA}$ ,  $c = 4.128009 \text{ \AA}$  and  $\alpha = \beta = 90^\circ$ ,  $\gamma = 120^\circ$

| Atom | x | y       | z        |         |
|------|---|---------|----------|---------|
| C2   | C | 0.30319 | -0.34952 | 3.12770 |
| C3   | C | 0.28906 | -0.37524 | 3.28573 |
| C4   | C | 0.28724 | -0.33997 | 2.97030 |
| C5   | C | 0.26024 | -0.39076 | 3.28715 |
| H6   | H | 0.30022 | -0.38370 | 3.40494 |
| C7   | C | 0.25844 | -0.35537 | 2.97200 |
| H8   | H | 0.29692 | -0.32034 | 2.84958 |
| C9   | C | 0.24461 | -0.38082 | 3.13037 |
| H10  | H | 0.25066 | -0.41038 | 3.41088 |
| H11  | H | 0.24679 | -0.34739 | 2.84884 |
| N32  | N | 0.39568 | -0.38940 | 3.12258 |
| C35  | C | 0.19847 | -0.41891 | 3.26562 |
| H36  | H | 0.20630 | -0.42947 | 3.41255 |
| C41  | C | 0.40017 | -0.16844 | 3.22929 |
| C42  | C | 0.39240 | -0.15056 | 3.37062 |
| N43  | N | 0.42411 | -0.15782 | 3.05691 |



|      |   |         |          |         |
|------|---|---------|----------|---------|
| C44  | C | 0.40930 | -0.12209 | 3.33159 |
| H45  | H | 0.37352 | -0.15853 | 3.50982 |
| C46  | C | 0.44091 | -0.13018 | 3.01678 |
| C47  | C | 0.43376 | -0.11173 | 3.15360 |
| H48  | H | 0.40338 | -0.10820 | 3.44091 |
| H49  | H | 0.45969 | -0.12265 | 2.87685 |
| C68  | C | 0.45129 | -0.08248 | 3.11127 |
| C69  | C | 0.46585 | -0.05792 | 3.07718 |
| C74  | C | 0.48305 | -0.02851 | 3.03922 |
| C75  | C | 0.47480 | -0.01068 | 3.17250 |
| C76  | C | 0.50785 | -0.01805 | 2.86737 |
| H79  | H | 0.51329 | -0.03252 | 2.76552 |
| O98  | O | 0.55062 | 0.02261  | 2.66039 |
| C104 | C | 0.43861 | -0.00527 | 3.43410 |
| H105 | H | 0.45197 | 0.00954  | 3.62326 |
| H106 | H | 0.43758 | 0.00625  | 3.22035 |
| C107 | C | 0.40953 | -0.02326 | 3.56901 |
| H108 | H | 0.39700 | -0.03956 | 3.38910 |
| H109 | H | 0.41069 | -0.03355 | 3.79396 |
| C110 | C | 0.39566 | -0.00613 | 3.64057 |
| H111 | H | 0.39519 | 0.00459  | 3.41628 |
| H112 | H | 0.40787 | 0.00981  | 3.82524 |
| C113 | C | 0.36608 | -0.02450 | 3.76319 |
| H114 | H | 0.35375 | -0.04042 | 3.57863 |
| H115 | H | 0.36633 | -0.03521 | 3.98842 |
| C116 | C | 0.35211 | -0.00758 | 3.83287 |
| H117 | H | 0.35018 | 0.00206  | 3.60664 |
| H118 | H | 0.33114 | -0.02125 | 3.93247 |
| H119 | H | 0.36422 | 0.00887  | 4.01258 |
| N1   | N | 0.33333 | -0.33333 | 3.12719 |

---

## References:

1. F. Auras, L. Ascherl, A. H. Hakimoun, J. T. Margraf, F. C. Hanusch, S. Reuter, D. Bessinger, M. Döblinger, C. Hettstedt and K. Karaghiosoff, *J. Am. Chem. Soc.*, 2016, **138**, 16703-16710.
2. B. J. Smith, A. C. Overholts, N. Hwang and W. R. Dichtel, *Chem. Commun.*, 2016, **52**, 3690-3693.
3. J. Dong, Y. Wang, G. Liu, Y. Cheng and D. Zhao, *CrystEngComm*, 2017, **19**, 4899-4904.
4. H. Xu, J. Gao and D. Jiang, *Nat Chem*, 2015, **7**, 905-912.
5. M. J. T. Frisch, G. W.; Schlegel, H. B.; Scuseria, G. E.; Robb, M. A.; Cheeseman, J. R.; Scalmani, G.; Barone, V.; Mennucci, B.; Petersson, G. A.; Nakatsuji, H.; Caricato,

- M.; Li, X.; Hratchian, H. P.; Izmaylov, A. F.; Bloino, J.; Zheng, G.; Sonnenberg, J. L.; Hada, M.; Ehara, M.; Toyota, K.; Fukuda, R.; Hasegawa, J.; Ishida, M.; Nakajima, T.; Honda, Y.; Kitao, O.; Nakai, H.; Vreven, T.; Montgomery, Jr. J. A.; Peralta, J. E.; Ogliaro, F.; Bearpark, M.; Heyd, J. J.; Brothers, E.; Kudin, K. N.; Staroverov, V. N.; Kobayashi, R.; Normand, J.; Raghavachari, K.; Rendell, A.; Burant, J. C.; Iyengar, S. S.; Tomasi, J.; Cossi, M.; Rega, N.; Millam, J. M.; Klene, M.; Knox, J. E.; Cross, J. B.; Bakken, V.; Adamo, C.; Jaramillo, J.; Gomperts, R.; Stratmann, R. E.; Yazyev, O.; Austin, A. J.; Cammi, R.; Pomelli, C.; Ochterski, J. W.; Martin, R. L.; Morokuma, K.; Zakrzewski, V. G.; Voth, G. A.; Salvador, P.; Dannenberg, J. J.; Dapprich, S.; Daniels, A. D.; Farkas, Ö.; Foresman, J. B.; Ortiz, J. V.; Cioslowski, J.; Fox, D. J. , *Gaussian 09, Revision D.01, Gaussian, Inc., Wallingford CT, 2009.*
6. B. Miehlisch, A. Savin, H. Stoll and H. Preuss, *Chem. Phys. Lett.*, 1989, **157**, 200-206.
  7. S. Grimme, J. Antony, S. Ehrlich and H. Krieg, *J. Chem. Phys.*, 2010, **132**, 154104.
  8. S. Grimme, *J. Comput. Chem.*, 2006, **27**, 1787-1799.
  9. S. Grimme, *J. Comput. Chem.*, 2004, **25**, 1463-1473.
  10. A. D. Becke, *J. Chem. Phys.*, 1993, **98**, 1372-1377.
  11. C. Lee, W. Yang and R. G. Parr, *Phys. Rev. B*, 1988, **37**, 785.
  12. P. J. Hay and W. R. Wadt, *J. Chem. Phys.*, 1985, **82**, 270-283.
  13. W. R. Wadt and P. J. Hay, *J. Chem. Phys.*, 1985, **82**, 284-298.
  14. H. Xu, D. Rebolgar, H. He, L. Chong, Y. Liu, C. Liu, C.-J. Sun, T. Li, J. V. Muntean and R. E. Winans, *Nat Energy*, 2020, **5**, 623-632.
